# Supplementary material for: Collateral sensitivity associated with antibiotic resistance plasmids
Source: eLife. 2021 Jan 20;10:e65130. doi: 10.7554/eLife.65130 (PMC7837676; doi:10.7554/eLife.65130)
Supplement: Figure 1—figure supplement 2—source data 1. [file elife-65130-fig1-figsupp2-data1.xlsx]

## Sheet: Sheet1
Plasmid	Replica	Antibiotic	Concentration	AUC	AUC at 0 antibiotic	Relative_AUC	Assay	Plasmid_Status
Empty	0	AZI	0	1124.67	1124.67	1	pCF12_AZI	Plasmid-free
Empty	0	AZI	2	913.03	1124.67	0.81182	pCF12_AZI	Plasmid-free
Empty	0	AZI	4	733.38	1124.67	0.652085	pCF12_AZI	Plasmid-free
Empty	0	AZI	8	718.6	1124.67	0.638943	pCF12_AZI	Plasmid-free
Empty	0	AZI	0	1124.67	1124.67	1	pOXA_AZI	Plasmid-free
Empty	0	AZI	2	913.03	1124.67	0.81182	pOXA_AZI	Plasmid-free
Empty	0	AZI	4	733.38	1124.67	0.652085	pOXA_AZI	Plasmid-free
Empty	0	AZI	8	718.6	1124.67	0.638943	pOXA_AZI	Plasmid-free
Empty	0	COL	0	1124.67	1124.67	1	pOXA_COL	Plasmid-free
Empty	0	COL	1	1122.66	1124.67	0.998217	pOXA_COL	Plasmid-free
Empty	0	COL	2	1208.7	1124.67	1.07472	pOXA_COL	Plasmid-free
Empty	0	COL	4	149.335	1124.67	0.132781	pOXA_COL	Plasmid-free
Empty	0	GM	0	1124.67	1124.67	1	pKAZ3_GM	Plasmid-free
Empty	0	GM	16	494.575	1124.67	0.439751	pKAZ3_GM	Plasmid-free
Empty	0	GM	4	689.595	1124.67	0.613153	pKAZ3_GM	Plasmid-free
Empty	0	GM	8	562.16	1124.67	0.499844	pKAZ3_GM	Plasmid-free
Empty	0	KM	0	1124.67	1124.67	1	pCF12_KM	Plasmid-free
Empty	0	KM	16	150.24	1124.67	0.133586	pCF12_KM	Plasmid-free
Empty	0	KM	4	520.865	1124.67	0.463127	pCF12_KM	Plasmid-free
Empty	0	KM	8	393.815	1124.67	0.35016	pCF12_KM	Plasmid-free
Empty	0	KM	0	1124.67	1124.67	1	pKAZ3_KM	Plasmid-free
Empty	0	KM	16	150.24	1124.67	0.133586	pKAZ3_KM	Plasmid-free
Empty	0	KM	4	520.865	1124.67	0.463127	pKAZ3_KM	Plasmid-free
Empty	0	KM	8	393.815	1124.67	0.35016	pKAZ3_KM	Plasmid-free
Empty	0	TET	0	1124.67	1124.67	1	pCF12_TET	Plasmid-free
Empty	0	TET	0.25	769.235	1124.67	0.683965	pCF12_TET	Plasmid-free
Empty	0	TET	0.5	442.545	1124.67	0.393489	pCF12_TET	Plasmid-free
Empty	0	TET	1	174.535	1124.67	0.155188	pCF12_TET	Plasmid-free
Empty	0	TET	0	1124.67	1124.67	1	pKA2_TET	Plasmid-free
Empty	0	TET	0.25	769.235	1124.67	0.683965	pKA2_TET	Plasmid-free
Empty	0	TET	0.5	442.545	1124.67	0.393489	pKA2_TET	Plasmid-free
Empty	0	TET	1	174.535	1124.67	0.155188	pKA2_TET	Plasmid-free
Empty	1	AZI	0	1050.91	1050.91	1	pCF12_AZI	Plasmid-free
Empty	1	AZI	2	651.56	1050.91	0.619997	pCF12_AZI	Plasmid-free
Empty	1	AZI	4	670.03	1050.91	0.637573	pCF12_AZI	Plasmid-free
Empty	1	AZI	8	606.61	1050.91	0.577225	pCF12_AZI	Plasmid-free
Empty	1	AZI	0	1050.91	1050.91	1	pOXA_AZI	Plasmid-free
Empty	1	AZI	2	651.56	1050.91	0.619997	pOXA_AZI	Plasmid-free
Empty	1	AZI	4	670.03	1050.91	0.637573	pOXA_AZI	Plasmid-free
Empty	1	AZI	8	606.61	1050.91	0.577225	pOXA_AZI	Plasmid-free
Empty	1	COL	0	1050.91	1050.91	1	pOXA_COL	Plasmid-free
Empty	1	COL	1	1125.25	1050.91	1.07075	pOXA_COL	Plasmid-free
Empty	1	COL	2	1124.59	1050.91	1.07012	pOXA_COL	Plasmid-free
Empty	1	COL	4	471.32	1050.91	0.448488	pOXA_COL	Plasmid-free
Empty	1	GM	0	1050.91	1050.91	1	pKAZ3_GM	Plasmid-free
Empty	1	GM	16	324.8	1050.91	0.309066	pKAZ3_GM	Plasmid-free
Empty	1	GM	4	647.12	1050.91	0.615772	pKAZ3_GM	Plasmid-free
Empty	1	GM	8	485.895	1050.91	0.462357	pKAZ3_GM	Plasmid-free
Empty	1	KM	0	1050.91	1050.91	1	pCF12_KM	Plasmid-free
Empty	1	KM	16	140.025	1050.91	0.133242	pCF12_KM	Plasmid-free
Empty	1	KM	4	641.235	1050.91	0.610172	pCF12_KM	Plasmid-free
Empty	1	KM	8	442.96	1050.91	0.421502	pCF12_KM	Plasmid-free
Empty	1	KM	0	1050.91	1050.91	1	pKAZ3_KM	Plasmid-free
Empty	1	KM	16	140.025	1050.91	0.133242	pKAZ3_KM	Plasmid-free
Empty	1	KM	4	641.235	1050.91	0.610172	pKAZ3_KM	Plasmid-free
Empty	1	KM	8	442.96	1050.91	0.421502	pKAZ3_KM	Plasmid-free
Empty	1	TET	0	1050.91	1050.91	1	pCF12_TET	Plasmid-free
Empty	1	TET	0.25	744.155	1050.91	0.708107	pCF12_TET	Plasmid-free
Empty	1	TET	0.5	446.415	1050.91	0.42479	pCF12_TET	Plasmid-free
Empty	1	TET	1	170.43	1050.91	0.162174	pCF12_TET	Plasmid-free
Empty	1	TET	0	1050.91	1050.91	1	pKA2_TET	Plasmid-free
Empty	1	TET	0.25	744.155	1050.91	0.708107	pKA2_TET	Plasmid-free
Empty	1	TET	0.5	446.415	1050.91	0.42479	pKA2_TET	Plasmid-free
Empty	1	TET	1	170.43	1050.91	0.162174	pKA2_TET	Plasmid-free
Empty	2	AZI	0	1011.24	1011.24	1	pCF12_AZI	Plasmid-free
Empty	2	AZI	2	813.675	1011.24	0.80463	pCF12_AZI	Plasmid-free
Empty	2	AZI	4	724.16	1011.24	0.71611	pCF12_AZI	Plasmid-free
Empty	2	AZI	8	666.645	1011.24	0.659234	pCF12_AZI	Plasmid-free
Empty	2	AZI	0	1011.24	1011.24	1	pOXA_AZI	Plasmid-free
Empty	2	AZI	2	813.675	1011.24	0.80463	pOXA_AZI	Plasmid-free
Empty	2	AZI	4	724.16	1011.24	0.71611	pOXA_AZI	Plasmid-free
Empty	2	AZI	8	666.645	1011.24	0.659234	pOXA_AZI	Plasmid-free
Empty	2	COL	0	1011.24	1011.24	1	pOXA_COL	Plasmid-free
Empty	2	COL	1	1192.13	1011.24	1.17888	pOXA_COL	Plasmid-free
Empty	2	COL	2	848.395	1011.24	0.838964	pOXA_COL	Plasmid-free
Empty	2	COL	4	560.04	1011.24	0.553814	pOXA_COL	Plasmid-free
Empty	2	GM	0	1011.24	1011.24	1	pKAZ3_GM	Plasmid-free
Empty	2	GM	16	452.355	1011.24	0.447326	pKAZ3_GM	Plasmid-free
Empty	2	GM	4	662.19	1011.24	0.654829	pKAZ3_GM	Plasmid-free
Empty	2	GM	8	567.88	1011.24	0.561567	pKAZ3_GM	Plasmid-free
Empty	2	KM	0	1011.24	1011.24	1	pCF12_KM	Plasmid-free
Empty	2	KM	16	254.64	1011.24	0.251809	pCF12_KM	Plasmid-free
Empty	2	KM	4	625.535	1011.24	0.618581	pCF12_KM	Plasmid-free
Empty	2	KM	8	272.11	1011.24	0.269085	pCF12_KM	Plasmid-free
Empty	2	KM	0	1011.24	1011.24	1	pKAZ3_KM	Plasmid-free
Empty	2	KM	16	254.64	1011.24	0.251809	pKAZ3_KM	Plasmid-free
Empty	2	KM	4	625.535	1011.24	0.618581	pKAZ3_KM	Plasmid-free
Empty	2	KM	8	272.11	1011.24	0.269085	pKAZ3_KM	Plasmid-free
Empty	2	TET	0	1011.24	1011.24	1	pCF12_TET	Plasmid-free
Empty	2	TET	0.25	803.695	1011.24	0.794761	pCF12_TET	Plasmid-free
Empty	2	TET	0.5	439.855	1011.24	0.434965	pCF12_TET	Plasmid-free
Empty	2	TET	1	207.395	1011.24	0.20509	pCF12_TET	Plasmid-free
Empty	2	TET	0	1011.24	1011.24	1	pKA2_TET	Plasmid-free
Empty	2	TET	0.25	803.695	1011.24	0.794761	pKA2_TET	Plasmid-free
Empty	2	TET	0.5	439.855	1011.24	0.434965	pKA2_TET	Plasmid-free
Empty	2	TET	1	207.395	1011.24	0.20509	pKA2_TET	Plasmid-free
Empty	3	AZI	0	1025.08	1025.08	1	pCF12_AZI	Plasmid-free
Empty	3	AZI	2	817.005	1025.08	0.797016	pCF12_AZI	Plasmid-free
Empty	3	AZI	4	738.93	1025.08	0.720852	pCF12_AZI	Plasmid-free
Empty	3	AZI	8	616.335	1025.08	0.601256	pCF12_AZI	Plasmid-free
Empty	3	AZI	0	1025.08	1025.08	1	pOXA_AZI	Plasmid-free
Empty	3	AZI	2	817.005	1025.08	0.797016	pOXA_AZI	Plasmid-free
Empty	3	AZI	4	738.93	1025.08	0.720852	pOXA_AZI	Plasmid-free
Empty	3	AZI	8	616.335	1025.08	0.601256	pOXA_AZI	Plasmid-free
Empty	3	COL	0	1025.08	1025.08	1	pOXA_COL	Plasmid-free
Empty	3	COL	1	1237.59	1025.08	1.20731	pOXA_COL	Plasmid-free
Empty	3	COL	2	1253.37	1025.08	1.22271	pOXA_COL	Plasmid-free
Empty	3	COL	4	484.37	1025.08	0.47252	pOXA_COL	Plasmid-free
Empty	3	GM	0	1025.08	1025.08	1	pKAZ3_GM	Plasmid-free
Empty	3	GM	16	460.515	1025.08	0.449248	pKAZ3_GM	Plasmid-free
Empty	3	GM	4	652.365	1025.08	0.636404	pKAZ3_GM	Plasmid-free
Empty	3	GM	8	508.87	1025.08	0.49642	pKAZ3_GM	Plasmid-free
Empty	3	KM	0	1025.08	1025.08	1	pCF12_KM	Plasmid-free
Empty	3	KM	16	140.91	1025.08	0.137463	pCF12_KM	Plasmid-free
Empty	3	KM	4	745.77	1025.08	0.727524	pCF12_KM	Plasmid-free
Empty	3	KM	8	392.79	1025.08	0.38318	pCF12_KM	Plasmid-free
Empty	3	KM	0	1025.08	1025.08	1	pKAZ3_KM	Plasmid-free
Empty	3	KM	16	140.91	1025.08	0.137463	pKAZ3_KM	Plasmid-free
Empty	3	KM	4	745.77	1025.08	0.727524	pKAZ3_KM	Plasmid-free
Empty	3	KM	8	392.79	1025.08	0.38318	pKAZ3_KM	Plasmid-free
Empty	3	TET	0	1025.08	1025.08	1	pCF12_TET	Plasmid-free
Empty	3	TET	0.25	711.275	1025.08	0.693873	pCF12_TET	Plasmid-free
Empty	3	TET	0.5	374.16	1025.08	0.365006	pCF12_TET	Plasmid-free
Empty	3	TET	1	172.665	1025.08	0.168441	pCF12_TET	Plasmid-free
Empty	3	TET	0	1025.08	1025.08	1	pKA2_TET	Plasmid-free
Empty	3	TET	0.25	711.275	1025.08	0.693873	pKA2_TET	Plasmid-free
Empty	3	TET	0.5	374.16	1025.08	0.365006	pKA2_TET	Plasmid-free
Empty	3	TET	1	172.665	1025.08	0.168441	pKA2_TET	Plasmid-free
Empty	4	AZI	0	1016.22	1016.22	1	pCF12_AZI	Plasmid-free
Empty	4	AZI	2	804.125	1016.22	0.791292	pCF12_AZI	Plasmid-free
Empty	4	AZI	4	734.855	1016.22	0.723128	pCF12_AZI	Plasmid-free
Empty	4	AZI	8	670.125	1016.22	0.659431	pCF12_AZI	Plasmid-free
Empty	4	AZI	0	1016.22	1016.22	1	pOXA_AZI	Plasmid-free
Empty	4	AZI	2	804.125	1016.22	0.791292	pOXA_AZI	Plasmid-free
Empty	4	AZI	4	734.855	1016.22	0.723128	pOXA_AZI	Plasmid-free
Empty	4	AZI	8	670.125	1016.22	0.659431	pOXA_AZI	Plasmid-free
Empty	4	COL	0	1016.22	1016.22	1	pOXA_COL	Plasmid-free
Empty	4	COL	1	1166.46	1016.22	1.14785	pOXA_COL	Plasmid-free
Empty	4	COL	2	749.515	1016.22	0.737554	pOXA_COL	Plasmid-free
Empty	4	COL	4	467.645	1016.22	0.460182	pOXA_COL	Plasmid-free
Empty	4	GM	0	1016.22	1016.22	1	pKAZ3_GM	Plasmid-free
Empty	4	GM	16	403.26	1016.22	0.396825	pKAZ3_GM	Plasmid-free
Empty	4	GM	4	704.285	1016.22	0.693046	pKAZ3_GM	Plasmid-free
Empty	4	GM	8	622.305	1016.22	0.612374	pKAZ3_GM	Plasmid-free
Empty	4	KM	0	1016.22	1016.22	1	pCF12_KM	Plasmid-free
Empty	4	KM	16	141.07	1016.22	0.138819	pCF12_KM	Plasmid-free
Empty	4	KM	4	569.395	1016.22	0.560308	pCF12_KM	Plasmid-free
Empty	4	KM	8	311.525	1016.22	0.306554	pCF12_KM	Plasmid-free
Empty	4	KM	0	1016.22	1016.22	1	pKAZ3_KM	Plasmid-free
Empty	4	KM	16	141.07	1016.22	0.138819	pKAZ3_KM	Plasmid-free
Empty	4	KM	4	569.395	1016.22	0.560308	pKAZ3_KM	Plasmid-free
Empty	4	KM	8	311.525	1016.22	0.306554	pKAZ3_KM	Plasmid-free
Empty	4	TET	0	1016.22	1016.22	1	pCF12_TET	Plasmid-free
Empty	4	TET	0.25	803.695	1016.22	0.790869	pCF12_TET	Plasmid-free
Empty	4	TET	0.5	439.855	1016.22	0.432836	pCF12_TET	Plasmid-free
Empty	4	TET	1	207.395	1016.22	0.204085	pCF12_TET	Plasmid-free
Empty	4	TET	0	1016.22	1016.22	1	pKA2_TET	Plasmid-free
Empty	4	TET	0.25	803.695	1016.22	0.790869	pKA2_TET	Plasmid-free
Empty	4	TET	0.5	439.855	1016.22	0.432836	pKA2_TET	Plasmid-free
Empty	4	TET	1	207.395	1016.22	0.204085	pKA2_TET	Plasmid-free
Empty	5	AZI	0	1073.19	1073.19	1	pCF12_AZI	Plasmid-free
Empty	5	AZI	2	746.48	1073.19	0.69557	pCF12_AZI	Plasmid-free
Empty	5	AZI	4	737.91	1073.19	0.687585	pCF12_AZI	Plasmid-free
Empty	5	AZI	8	675.115	1073.19	0.629072	pCF12_AZI	Plasmid-free
Empty	5	AZI	0	1073.19	1073.19	1	pOXA_AZI	Plasmid-free
Empty	5	AZI	2	746.48	1073.19	0.69557	pOXA_AZI	Plasmid-free
Empty	5	AZI	4	737.91	1073.19	0.687585	pOXA_AZI	Plasmid-free
Empty	5	AZI	8	675.115	1073.19	0.629072	pOXA_AZI	Plasmid-free
Empty	5	COL	0	1073.19	1073.19	1	pOXA_COL	Plasmid-free
Empty	5	COL	1	1368.95	1073.19	1.27559	pOXA_COL	Plasmid-free
Empty	5	COL	2	1254.62	1073.19	1.16906	pOXA_COL	Plasmid-free
Empty	5	COL	4	134.205	1073.19	0.125052	pOXA_COL	Plasmid-free
Empty	5	GM	0	1073.19	1073.19	1	pKAZ3_GM	Plasmid-free
Empty	5	GM	16	330.955	1073.19	0.308384	pKAZ3_GM	Plasmid-free
Empty	5	GM	4	685.025	1073.19	0.638306	pKAZ3_GM	Plasmid-free
Empty	5	GM	8	572.845	1073.19	0.533777	pKAZ3_GM	Plasmid-free
Empty	5	KM	0	1073.19	1073.19	1	pCF12_KM	Plasmid-free
Empty	5	KM	16	277.455	1073.19	0.258533	pCF12_KM	Plasmid-free
Empty	5	KM	4	617.1	1073.19	0.575014	pCF12_KM	Plasmid-free
Empty	5	KM	8	317.13	1073.19	0.295502	pCF12_KM	Plasmid-free
Empty	5	KM	0	1073.19	1073.19	1	pKAZ3_KM	Plasmid-free
Empty	5	KM	16	277.455	1073.19	0.258533	pKAZ3_KM	Plasmid-free
Empty	5	KM	4	617.1	1073.19	0.575014	pKAZ3_KM	Plasmid-free
Empty	5	KM	8	317.13	1073.19	0.295502	pKAZ3_KM	Plasmid-free
Empty	5	TET	0	1073.19	1073.19	1	pCF12_TET	Plasmid-free
Empty	5	TET	0.25	711.275	1073.19	0.662766	pCF12_TET	Plasmid-free
Empty	5	TET	0.5	374.16	1073.19	0.348642	pCF12_TET	Plasmid-free
Empty	5	TET	1	172.665	1073.19	0.160889	pCF12_TET	Plasmid-free
Empty	5	TET	0	1073.19	1073.19	1	pKA2_TET	Plasmid-free
Empty	5	TET	0.25	711.275	1073.19	0.662766	pKA2_TET	Plasmid-free
Empty	5	TET	0.5	374.16	1073.19	0.348642	pKA2_TET	Plasmid-free
Empty	5	TET	1	172.665	1073.19	0.160889	pKA2_TET	Plasmid-free
pCF12	10	AZI	0	1076.83	1076.83	1	pCF12_AZI	Plasmid carrier
pCF12	10	AZI	2	494.86	1076.83	0.459553	pCF12_AZI	Plasmid carrier
pCF12	10	AZI	4	341.025	1076.83	0.316693	pCF12_AZI	Plasmid carrier
pCF12	10	AZI	8	265.645	1076.83	0.246692	pCF12_AZI	Plasmid carrier
pCF12	10	AZI	0	1076.83	1076.83	1	pCF12_KM	Plasmid carrier
pCF12	10	AZI	0	1076.83	1076.83	1	pCF12_TET	Plasmid carrier
pCF12	10	KM	0	1076.83	1076.83	1	pCF12_AZI	Plasmid carrier
pCF12	10	KM	0	1076.83	1076.83	1	pCF12_KM	Plasmid carrier
pCF12	10	KM	16	138.205	1076.83	0.128344	pCF12_KM	Plasmid carrier
pCF12	10	KM	4	313.18	1076.83	0.290835	pCF12_KM	Plasmid carrier
pCF12	10	KM	8	271.625	1076.83	0.252245	pCF12_KM	Plasmid carrier
pCF12	10	KM	0	1076.83	1076.83	1	pCF12_TET	Plasmid carrier
pCF12	10	TET	0	1076.83	1076.83	1	pCF12_AZI	Plasmid carrier
pCF12	10	TET	0	1076.83	1076.83	1	pCF12_KM	Plasmid carrier
pCF12	10	TET	0	1076.83	1076.83	1	pCF12_TET	Plasmid carrier
pCF12	10	TET	0.25	617.985	1076.83	0.573893	pCF12_TET	Plasmid carrier
pCF12	10	TET	0.5	262.755	1076.83	0.244008	pCF12_TET	Plasmid carrier
pCF12	10	TET	1	171.375	1076.83	0.159148	pCF12_TET	Plasmid carrier
pCF12	11	AZI	0	1021.66	1021.66	1	pCF12_AZI	Plasmid carrier
pCF12	11	AZI	2	362.925	1021.66	0.355231	pCF12_AZI	Plasmid carrier
pCF12	11	AZI	4	344.865	1021.66	0.337554	pCF12_AZI	Plasmid carrier
pCF12	11	AZI	8	270.93	1021.66	0.265186	pCF12_AZI	Plasmid carrier
pCF12	11	AZI	0	1021.66	1021.66	1	pCF12_KM	Plasmid carrier
pCF12	11	AZI	0	1021.66	1021.66	1	pCF12_TET	Plasmid carrier
pCF12	11	KM	0	1021.66	1021.66	1	pCF12_AZI	Plasmid carrier
pCF12	11	KM	0	1021.66	1021.66	1	pCF12_KM	Plasmid carrier
pCF12	11	KM	16	132.56	1021.66	0.12975	pCF12_KM	Plasmid carrier
pCF12	11	KM	4	465.765	1021.66	0.455891	pCF12_KM	Plasmid carrier
pCF12	11	KM	8	148.105	1021.66	0.144965	pCF12_KM	Plasmid carrier
pCF12	11	KM	0	1021.66	1021.66	1	pCF12_TET	Plasmid carrier
pCF12	11	TET	0	1021.66	1021.66	1	pCF12_AZI	Plasmid carrier
pCF12	11	TET	0	1021.66	1021.66	1	pCF12_KM	Plasmid carrier
pCF12	11	TET	0	1021.66	1021.66	1	pCF12_TET	Plasmid carrier
pCF12	11	TET	0.25	605.355	1021.66	0.592522	pCF12_TET	Plasmid carrier
pCF12	11	TET	0.5	344.805	1021.66	0.337495	pCF12_TET	Plasmid carrier
pCF12	11	TET	1	164.49	1021.66	0.161003	pCF12_TET	Plasmid carrier
pCF12	12	AZI	0	871.314	871.314	1	pCF12_AZI	Plasmid carrier
pCF12	12	AZI	2	456.615	871.314	0.524053	pCF12_AZI	Plasmid carrier
pCF12	12	AZI	4	382.495	871.314	0.438987	pCF12_AZI	Plasmid carrier
pCF12	12	AZI	8	279.29	871.314	0.320539	pCF12_AZI	Plasmid carrier
pCF12	12	AZI	0	871.314	871.314	1	pCF12_KM	Plasmid carrier
pCF12	12	AZI	0	871.314	871.314	1	pCF12_TET	Plasmid carrier
pCF12	12	KM	0	871.314	871.314	1	pCF12_AZI	Plasmid carrier
pCF12	12	KM	0	871.314	871.314	1	pCF12_KM	Plasmid carrier
pCF12	12	KM	16	133.755	871.314	0.15351	pCF12_KM	Plasmid carrier
pCF12	12	KM	4	370.68	871.314	0.425427	pCF12_KM	Plasmid carrier
pCF12	12	KM	8	195.74	871.314	0.224649	pCF12_KM	Plasmid carrier
pCF12	12	KM	0	871.314	871.314	1	pCF12_TET	Plasmid carrier
pCF12	12	TET	0	871.314	871.314	1	pCF12_AZI	Plasmid carrier
pCF12	12	TET	0	871.314	871.314	1	pCF12_KM	Plasmid carrier
pCF12	12	TET	0	871.314	871.314	1	pCF12_TET	Plasmid carrier
pCF12	12	TET	0.25	562.94	871.314	0.646082	pCF12_TET	Plasmid carrier
pCF12	12	TET	0.5	217.135	871.314	0.249204	pCF12_TET	Plasmid carrier
pCF12	12	TET	1	155.73	871.314	0.17873	pCF12_TET	Plasmid carrier
pCF12	7	AZI	0	989.609	989.609	1	pCF12_AZI	Plasmid carrier
pCF12	7	AZI	2	211.785	989.609	0.214009	pCF12_AZI	Plasmid carrier
pCF12	7	AZI	4	217.06	989.609	0.219339	pCF12_AZI	Plasmid carrier
pCF12	7	AZI	8	225.915	989.609	0.228287	pCF12_AZI	Plasmid carrier
pCF12	7	AZI	0	987.488	987.488	1	pCF12_KM	Plasmid carrier
pCF12	7	AZI	0	989.609	989.609	1	pCF12_TET	Plasmid carrier
pCF12	7	KM	0	989.609	989.609	1	pCF12_AZI	Plasmid carrier
pCF12	7	KM	0	987.488	987.488	1	pCF12_KM	Plasmid carrier
pCF12	7	KM	16	159.515	987.488	0.161536	pCF12_KM	Plasmid carrier
pCF12	7	KM	4	229.135	987.488	0.232038	pCF12_KM	Plasmid carrier
pCF12	7	KM	8	197.54	987.488	0.200043	pCF12_KM	Plasmid carrier
pCF12	7	KM	0	989.609	989.609	1	pCF12_TET	Plasmid carrier
pCF12	7	TET	0	989.609	989.609	1	pCF12_AZI	Plasmid carrier
pCF12	7	TET	0	987.488	987.488	1	pCF12_KM	Plasmid carrier
pCF12	7	TET	0	989.609	989.609	1	pCF12_TET	Plasmid carrier
pCF12	7	TET	0.25	553.515	989.609	0.559327	pCF12_TET	Plasmid carrier
pCF12	7	TET	0.5	329.595	989.609	0.333056	pCF12_TET	Plasmid carrier
pCF12	7	TET	1	166.87	989.609	0.168622	pCF12_TET	Plasmid carrier
pCF12	8	AZI	0	872.411	872.411	1	pCF12_AZI	Plasmid carrier
pCF12	8	AZI	2	268.32	872.411	0.307561	pCF12_AZI	Plasmid carrier
pCF12	8	AZI	4	325.02	872.411	0.372554	pCF12_AZI	Plasmid carrier
pCF12	8	AZI	8	245.425	872.411	0.281318	pCF12_AZI	Plasmid carrier
pCF12	8	AZI	0	872.411	872.411	1	pCF12_KM	Plasmid carrier
pCF12	8	AZI	0	872.411	872.411	1	pCF12_TET	Plasmid carrier
pCF12	8	KM	0	872.411	872.411	1	pCF12_AZI	Plasmid carrier
pCF12	8	KM	0	872.411	872.411	1	pCF12_KM	Plasmid carrier
pCF12	8	KM	16	143.715	872.411	0.164733	pCF12_KM	Plasmid carrier
pCF12	8	KM	4	524.11	872.411	0.60076	pCF12_KM	Plasmid carrier
pCF12	8	KM	8	160.96	872.411	0.1845	pCF12_KM	Plasmid carrier
pCF12	8	KM	0	872.411	872.411	1	pCF12_TET	Plasmid carrier
pCF12	8	TET	0	872.411	872.411	1	pCF12_AZI	Plasmid carrier
pCF12	8	TET	0	872.411	872.411	1	pCF12_KM	Plasmid carrier
pCF12	8	TET	0	872.411	872.411	1	pCF12_TET	Plasmid carrier
pCF12	8	TET	0.25	617.985	872.411	0.708364	pCF12_TET	Plasmid carrier
pCF12	8	TET	0.5	262.755	872.411	0.301182	pCF12_TET	Plasmid carrier
pCF12	8	TET	1	171.375	872.411	0.196438	pCF12_TET	Plasmid carrier
pCF12	9	AZI	0	977.817	977.817	1	pCF12_AZI	Plasmid carrier
pCF12	9	AZI	2	434.09	977.817	0.443938	pCF12_AZI	Plasmid carrier
pCF12	9	AZI	4	394.075	977.817	0.403015	pCF12_AZI	Plasmid carrier
pCF12	9	AZI	8	279.94	977.817	0.286291	pCF12_AZI	Plasmid carrier
pCF12	9	AZI	0	978.102	978.102	1	pCF12_KM	Plasmid carrier
pCF12	9	AZI	0	977.817	977.817	1	pCF12_TET	Plasmid carrier
pCF12	9	KM	0	977.817	977.817	1	pCF12_AZI	Plasmid carrier
pCF12	9	KM	0	978.102	978.102	1	pCF12_KM	Plasmid carrier
pCF12	9	KM	16	134.755	978.102	0.137772	pCF12_KM	Plasmid carrier
pCF12	9	KM	4	390.305	978.102	0.399043	pCF12_KM	Plasmid carrier
pCF12	9	KM	8	177.655	978.102	0.181632	pCF12_KM	Plasmid carrier
pCF12	9	KM	0	977.817	977.817	1	pCF12_TET	Plasmid carrier
pCF12	9	TET	0	977.817	977.817	1	pCF12_AZI	Plasmid carrier
pCF12	9	TET	0	978.102	978.102	1	pCF12_KM	Plasmid carrier
pCF12	9	TET	0	977.817	977.817	1	pCF12_TET	Plasmid carrier
pCF12	9	TET	0.25	553.515	977.817	0.566072	pCF12_TET	Plasmid carrier
pCF12	9	TET	0.5	329.595	977.817	0.337072	pCF12_TET	Plasmid carrier
pCF12	9	TET	1	166.87	977.817	0.170656	pCF12_TET	Plasmid carrier
pKA2	0	TET	0	841.657	841.657	1	pKA2_TET	Plasmid carrier
pKA2	0	TET	0.25	645.97	841.657	0.767497	pKA2_TET	Plasmid carrier
pKA2	0	TET	0.5	378.825	841.657	0.450094	pKA2_TET	Plasmid carrier
pKA2	0	TET	1	137.82	841.657	0.163748	pKA2_TET	Plasmid carrier
pKA2	1	TET	0	885.27	885.27	1	pKA2_TET	Plasmid carrier
pKA2	1	TET	0.25	623.32	885.27	0.704102	pKA2_TET	Plasmid carrier
pKA2	1	TET	0.5	362.025	885.27	0.408943	pKA2_TET	Plasmid carrier
pKA2	1	TET	1	139.175	885.27	0.157212	pKA2_TET	Plasmid carrier
pKA2	2	TET	0	933.523	933.523	1	pKA2_TET	Plasmid carrier
pKA2	2	TET	0.25	613.325	933.523	0.657001	pKA2_TET	Plasmid carrier
pKA2	2	TET	0.5	273.235	933.523	0.292692	pKA2_TET	Plasmid carrier
pKA2	2	TET	1	129.88	933.523	0.139129	pKA2_TET	Plasmid carrier
pKA2	3	TET	0	926.313	926.313	1	pKA2_TET	Plasmid carrier
pKA2	3	TET	0.25	471.24	926.313	0.508727	pKA2_TET	Plasmid carrier
pKA2	3	TET	0.5	316.56	926.313	0.341742	pKA2_TET	Plasmid carrier
pKA2	3	TET	1	127.7	926.313	0.137858	pKA2_TET	Plasmid carrier
pKA2	4	TET	0	831.82	831.82	1	pKA2_TET	Plasmid carrier
pKA2	4	TET	0.25	613.325	831.82	0.737329	pKA2_TET	Plasmid carrier
pKA2	4	TET	0.5	273.235	831.82	0.328479	pKA2_TET	Plasmid carrier
pKA2	4	TET	1	129.88	831.82	0.15614	pKA2_TET	Plasmid carrier
pKA2	5	TET	0	806.388	806.388	1	pKA2_TET	Plasmid carrier
pKA2	5	TET	0.25	471.24	806.388	0.584384	pKA2_TET	Plasmid carrier
pKA2	5	TET	0.5	316.56	806.388	0.392566	pKA2_TET	Plasmid carrier
pKA2	5	TET	1	127.7	806.388	0.158361	pKA2_TET	Plasmid carrier
pKAZ3	0	GM	0	682.343	682.343	1	pKAZ3_GM	Plasmid carrier
pKAZ3	0	GM	16	379.96	682.343	0.556846	pKAZ3_GM	Plasmid carrier
pKAZ3	0	GM	4	638.39	682.343	0.935585	pKAZ3_GM	Plasmid carrier
pKAZ3	0	GM	8	545.52	682.343	0.79948	pKAZ3_GM	Plasmid carrier
pKAZ3	0	GM	0	682.343	682.343	1	pKAZ3_KM	Plasmid carrier
pKAZ3	0	KM	0	682.343	682.343	1	pKAZ3_GM	Plasmid carrier
pKAZ3	0	KM	0	682.343	682.343	1	pKAZ3_KM	Plasmid carrier
pKAZ3	0	KM	16	136.36	682.343	0.199841	pKAZ3_KM	Plasmid carrier
pKAZ3	0	KM	4	341.59	682.343	0.500613	pKAZ3_KM	Plasmid carrier
pKAZ3	0	KM	8	135.47	682.343	0.198536	pKAZ3_KM	Plasmid carrier
pKAZ3	1	GM	0	855.14	855.14	1	pKAZ3_GM	Plasmid carrier
pKAZ3	1	GM	16	368.845	855.14	0.431327	pKAZ3_GM	Plasmid carrier
pKAZ3	1	GM	4	706.55	855.14	0.826239	pKAZ3_GM	Plasmid carrier
pKAZ3	1	GM	8	134.1	855.14	0.156816	pKAZ3_GM	Plasmid carrier
pKAZ3	1	GM	0	855.14	855.14	1	pKAZ3_KM	Plasmid carrier
pKAZ3	1	KM	0	855.14	855.14	1	pKAZ3_GM	Plasmid carrier
pKAZ3	1	KM	0	855.14	855.14	1	pKAZ3_KM	Plasmid carrier
pKAZ3	1	KM	16	159.48	855.14	0.186496	pKAZ3_KM	Plasmid carrier
pKAZ3	1	KM	4	327.685	855.14	0.383195	pKAZ3_KM	Plasmid carrier
pKAZ3	1	KM	8	370.245	855.14	0.432964	pKAZ3_KM	Plasmid carrier
pKAZ3	2	GM	0	945.103	945.103	1	pKAZ3_GM	Plasmid carrier
pKAZ3	2	GM	16	457.23	945.103	0.483788	pKAZ3_GM	Plasmid carrier
pKAZ3	2	GM	4	662.7	945.103	0.701193	pKAZ3_GM	Plasmid carrier
pKAZ3	2	GM	8	500.385	945.103	0.52945	pKAZ3_GM	Plasmid carrier
pKAZ3	2	GM	0	945.103	945.103	1	pKAZ3_KM	Plasmid carrier
pKAZ3	2	KM	0	945.103	945.103	1	pKAZ3_GM	Plasmid carrier
pKAZ3	2	KM	0	945.103	945.103	1	pKAZ3_KM	Plasmid carrier
pKAZ3	2	KM	16	136.91	945.103	0.144862	pKAZ3_KM	Plasmid carrier
pKAZ3	2	KM	4	566.92	945.103	0.59985	pKAZ3_KM	Plasmid carrier
pKAZ3	2	KM	8	147.075	945.103	0.155618	pKAZ3_KM	Plasmid carrier
pKAZ3	3	GM	0	1011.95	1011.95	1	pKAZ3_GM	Plasmid carrier
pKAZ3	3	GM	16	169.765	1011.95	0.16776	pKAZ3_GM	Plasmid carrier
pKAZ3	3	GM	4	668.745	1011.95	0.660848	pKAZ3_GM	Plasmid carrier
pKAZ3	3	GM	8	525.23	1011.95	0.519028	pKAZ3_GM	Plasmid carrier
pKAZ3	3	GM	0	1011.95	1011.95	1	pKAZ3_KM	Plasmid carrier
pKAZ3	3	KM	0	1011.95	1011.95	1	pKAZ3_GM	Plasmid carrier
pKAZ3	3	KM	0	1011.95	1011.95	1	pKAZ3_KM	Plasmid carrier
pKAZ3	3	KM	16	134.255	1011.95	0.13267	pKAZ3_KM	Plasmid carrier
pKAZ3	3	KM	4	370	1011.95	0.365631	pKAZ3_KM	Plasmid carrier
pKAZ3	3	KM	8	260.935	1011.95	0.257854	pKAZ3_KM	Plasmid carrier
pKAZ3	4	GM	0	856.338	856.338	1	pKAZ3_GM	Plasmid carrier
pKAZ3	4	GM	16	445.05	856.338	0.519713	pKAZ3_GM	Plasmid carrier
pKAZ3	4	GM	4	672.775	856.338	0.785642	pKAZ3_GM	Plasmid carrier
pKAZ3	4	GM	8	538.625	856.338	0.628986	pKAZ3_GM	Plasmid carrier
pKAZ3	4	GM	0	856.338	856.338	1	pKAZ3_KM	Plasmid carrier
pKAZ3	4	KM	0	856.338	856.338	1	pKAZ3_GM	Plasmid carrier
pKAZ3	4	KM	0	856.338	856.338	1	pKAZ3_KM	Plasmid carrier
pKAZ3	4	KM	16	142.83	856.338	0.166792	pKAZ3_KM	Plasmid carrier
pKAZ3	4	KM	4	217.99	856.338	0.254561	pKAZ3_KM	Plasmid carrier
pKAZ3	4	KM	8	137.105	856.338	0.160106	pKAZ3_KM	Plasmid carrier
pKAZ3	5	GM	0	875.178	875.178	1	pKAZ3_GM	Plasmid carrier
pKAZ3	5	GM	16	454.6	875.178	0.519437	pKAZ3_GM	Plasmid carrier
pKAZ3	5	GM	4	650.035	875.178	0.742746	pKAZ3_GM	Plasmid carrier
pKAZ3	5	GM	8	486.24	875.178	0.55559	pKAZ3_GM	Plasmid carrier
pKAZ3	5	GM	0	875.178	875.178	1	pKAZ3_KM	Plasmid carrier
pKAZ3	5	KM	0	875.178	875.178	1	pKAZ3_GM	Plasmid carrier
pKAZ3	5	KM	0	875.178	875.178	1	pKAZ3_KM	Plasmid carrier
pKAZ3	5	KM	16	138.515	875.178	0.158271	pKAZ3_KM	Plasmid carrier
pKAZ3	5	KM	4	468.865	875.178	0.535737	pKAZ3_KM	Plasmid carrier
pKAZ3	5	KM	8	299.385	875.178	0.342085	pKAZ3_KM	Plasmid carrier
pOXA	0	AZI	0	798.192	798.192	1	pOXA_AZI	Plasmid carrier
pOXA	0	AZI	2	504.95	798.192	0.632617	pOXA_AZI	Plasmid carrier
pOXA	0	AZI	4	361.83	798.192	0.453312	pOXA_AZI	Plasmid carrier
pOXA	0	AZI	8	443.455	798.192	0.555575	pOXA_AZI	Plasmid carrier
pOXA	0	AZI	0	798.192	798.192	1	pOXA_COL	Plasmid carrier
pOXA	0	COL	0	798.192	798.192	1	pOXA_AZI	Plasmid carrier
pOXA	0	COL	0	798.192	798.192	1	pOXA_COL	Plasmid carrier
pOXA	0	COL	1	947.8	798.192	1.18743	pOXA_COL	Plasmid carrier
pOXA	0	COL	2	133.85	798.192	0.167692	pOXA_COL	Plasmid carrier
pOXA	0	COL	4	129.11	798.192	0.161753	pOXA_COL	Plasmid carrier
pOXA	1	AZI	0	849.882	849.882	1	pOXA_AZI	Plasmid carrier
pOXA	1	AZI	2	513.6	849.882	0.604319	pOXA_AZI	Plasmid carrier
pOXA	1	AZI	4	365.26	849.882	0.429777	pOXA_AZI	Plasmid carrier
pOXA	1	AZI	8	136.705	849.882	0.160852	pOXA_AZI	Plasmid carrier
pOXA	1	AZI	0	849.882	849.882	1	pOXA_COL	Plasmid carrier
pOXA	1	COL	0	849.882	849.882	1	pOXA_AZI	Plasmid carrier
pOXA	1	COL	0	849.882	849.882	1	pOXA_COL	Plasmid carrier
pOXA	1	COL	1	436.425	849.882	0.513513	pOXA_COL	Plasmid carrier
pOXA	1	COL	2	220.23	849.882	0.25913	pOXA_COL	Plasmid carrier
pOXA	1	COL	4	129.745	849.882	0.152662	pOXA_COL	Plasmid carrier
pOXA	2	AZI	0	1104.08	1104.08	1	pOXA_AZI	Plasmid carrier
pOXA	2	AZI	2	563.01	1104.08	0.509936	pOXA_AZI	Plasmid carrier
pOXA	2	AZI	4	435.96	1104.08	0.394863	pOXA_AZI	Plasmid carrier
pOXA	2	AZI	8	396.27	1104.08	0.358914	pOXA_AZI	Plasmid carrier
pOXA	2	AZI	0	1104.08	1104.08	1	pOXA_COL	Plasmid carrier
pOXA	2	COL	0	1104.08	1104.08	1	pOXA_AZI	Plasmid carrier
pOXA	2	COL	0	1104.08	1104.08	1	pOXA_COL	Plasmid carrier
pOXA	2	COL	1	666.435	1104.08	0.603611	pOXA_COL	Plasmid carrier
pOXA	2	COL	2	174.145	1104.08	0.157729	pOXA_COL	Plasmid carrier
pOXA	2	COL	4	138.135	1104.08	0.125113	pOXA_COL	Plasmid carrier
pOXA	3	AZI	0	935.702	935.702	1	pOXA_AZI	Plasmid carrier
pOXA	3	AZI	2	602.005	935.702	0.643373	pOXA_AZI	Plasmid carrier
pOXA	3	AZI	4	504.805	935.702	0.539494	pOXA_AZI	Plasmid carrier
pOXA	3	AZI	8	414.385	935.702	0.44286	pOXA_AZI	Plasmid carrier
pOXA	3	AZI	0	935.702	935.702	1	pOXA_COL	Plasmid carrier
pOXA	3	COL	0	935.702	935.702	1	pOXA_AZI	Plasmid carrier
pOXA	3	COL	0	935.702	935.702	1	pOXA_COL	Plasmid carrier
pOXA	3	COL	1	913.15	935.702	0.975899	pOXA_COL	Plasmid carrier
pOXA	3	COL	2	163.49	935.702	0.174724	pOXA_COL	Plasmid carrier
pOXA	3	COL	4	135.32	935.702	0.144619	pOXA_COL	Plasmid carrier
pOXA	4	AZI	0	1023.51	1023.51	1	pOXA_AZI	Plasmid carrier
pOXA	4	AZI	2	525.425	1023.51	0.513357	pOXA_AZI	Plasmid carrier
pOXA	4	AZI	4	435.95	1023.51	0.425937	pOXA_AZI	Plasmid carrier
pOXA	4	AZI	8	373.09	1023.51	0.364521	pOXA_AZI	Plasmid carrier
pOXA	4	AZI	0	1023.51	1023.51	1	pOXA_COL	Plasmid carrier
pOXA	4	COL	0	1023.51	1023.51	1	pOXA_AZI	Plasmid carrier
pOXA	4	COL	0	1023.51	1023.51	1	pOXA_COL	Plasmid carrier
pOXA	4	COL	1	1095.2	1023.51	1.07005	pOXA_COL	Plasmid carrier
pOXA	4	COL	2	128.15	1023.51	0.125207	pOXA_COL	Plasmid carrier
pOXA	4	COL	4	255.29	1023.51	0.249426	pOXA_COL	Plasmid carrier
pOXA	5	AZI	0	989.59	989.59	1	pOXA_AZI	Plasmid carrier
pOXA	5	AZI	2	508.535	989.59	0.513885	pOXA_AZI	Plasmid carrier
pOXA	5	AZI	4	423.14	989.59	0.427591	pOXA_AZI	Plasmid carrier
pOXA	5	AZI	8	485.03	989.59	0.490132	pOXA_AZI	Plasmid carrier
pOXA	5	AZI	0	989.59	989.59	1	pOXA_COL	Plasmid carrier
pOXA	5	COL	0	989.59	989.59	1	pOXA_AZI	Plasmid carrier
pOXA	5	COL	0	989.59	989.59	1	pOXA_COL	Plasmid carrier
pOXA	5	COL	1	783.705	989.59	0.791949	pOXA_COL	Plasmid carrier
pOXA	5	COL	2	706.415	989.59	0.713846	pOXA_COL	Plasmid carrier
pOXA	5	COL	4	131.295	989.59	0.132676	pOXA_COL	Plasmid carrier
