# Supplementary material for: Collateral sensitivity associated with antibiotic resistance plasmids
Source: eLife. 2021 Jan 20;10:e65130. doi: 10.7554/eLife.65130 (PMC7837676; doi:10.7554/eLife.65130)
Supplement: Figure 1—source data 1. [file elife-65130-fig1-data1.xlsx]

## Sheet: Figure 1A
Relative Fitness
pKP-M1144	pCEMR	pCF12	pKA2Q	pKAZ3	pOXA-48
0.732321795	0.761883816	0.898908273	0.828657944	0.723335102	0.76688574
0.729724079	0.767055295	0.918516381	0.807807008	0.735769139	0.789245143
0.726878083	0.756324757	0.930670833	0.781381611	0.741547596	0.768647519
0.724942086	0.754587909	0.923985782	0.806249599	0.735038367	0.760429523
0.740224405	0.746548001	0.883319573	0.799911306	0.734586238	0.770701518
0.714876211	0.756005247	0.874203332	0.787054282	0.729084545	0.802512523

## Sheet: Figure 1B and Supplementary Fil
For each strain the concentration of antibiotic that produced OD<.2 was recorded. 4-5 independent biological replicates were included for each strain.
AB	MG1655										MG/pOXA-48										MG/pCF12										MG/pKP-M1144					MG/pCEMR					MG/pKA2Q
KM	16	32	8	8	16	16	16	8	16	8	32	32	16	8							8	4	4	2	4	8	8	2	4	2	32	64	16	8		512	512	64	8		32	16	4	8
GM	8	8	4	4	16	16	4	8	2	4	8	8	4	4							4	4	4	4							4	8	8	8		16	8	8	8		8	4	4	4
ERT	0.0625	0.0625	0.0625	0.03125							0.125	0.5	0.25	0.125							0.0625	0.125	0.125	0.125							1	1	0.25	0.5		0.25	0.25	0.25	1		1	0.125	0.125	0.125
AMC	16	64	16	8							512	512	512	512							256	128	128	128							512	256	256	512		512	512	512	512		256	256	128	256
CAZ	0.5	0.25	0.5	0.25							1	0.5	0.5	0.5							32	32	32	32							32	32	32	32		32	32	32	32		32	32	32	32
CTX	0.25	0.25	0.5	0.5							8	8	8	8							8	8	8	8							8	8	8	8		8	8	8	8		8	8	8	8
TET	4	2	8	4	1	4	1	2	2	1	4	4	8	16	2						2	2	2	8	0.5	1	1	2	1	1	4	2	8	8	2	4	4	16	4	1	2	2	4	2	1	1	0.5	1	1
TGC	1	1	1	2							0.5	1	1	1							0.5	1	1	1							0.5	1	1	1		0.5	1	1	1		0.5	1	1	1
COL	8	8	8	8	4	8	8	8	8	8	4	8	4	4	2	2	4	4	4	4	8	4	4	8							4	4	8	8		8	4	8	8		8	8	8	8
CIP	0.5	8	0.5	0.5							2	1	0.5	0.25							1	8	16	8							0.5	4	2	8		1	2	2	128		0.5	2	2	0.5
AZY	16	4	16	32	16	32	16	16	16	32	8	8	8	8	8	8	8	8	8	16	8	4	16	8	4	8	8	8	2	4	16	8	16	8		16	8	16	8		16	8	16	8
RIF	8	4	16	8	16						64	2	8	16	8						32	8	2	16	4						256	16	128	1024	512	128	8	16	8	512	32	32	16		8
CM	8	8	16	4	16						4	8	16	16	32						8	4	8	16	32						2	4	16	32	8	2	2	8	32	8	2	2	16	8	16
[truncated: 6 more columns]

## Sheet: Figure 1C
Growth curves (raw data)
Time (min)	Assay	Antibiotic	Concentration	Plasmid	Plasmid_Status	Replica	DO_600
0	pCF12_AZI	AZI	2	pCF12	Plasmid_Carrier	7	0.114
10	pCF12_AZI	AZI	2	pCF12	Plasmid_Carrier	7	0.099
20	pCF12_AZI	AZI	2	pCF12	Plasmid_Carrier	7	0.098
30	pCF12_AZI	AZI	2	pCF12	Plasmid_Carrier	7	0.099
40	pCF12_AZI	AZI	2	pCF12	Plasmid_Carrier	7	0.099
50	pCF12_AZI	AZI	2	pCF12	Plasmid_Carrier	7	0.098
60	pCF12_AZI	AZI	2	pCF12	Plasmid_Carrier	7	0.099
70	pCF12_AZI	AZI	2	pCF12	Plasmid_Carrier	7	0.101
80	pCF12_AZI	AZI	2	pCF12	Plasmid_Carrier	7	0.104
90	pCF12_AZI	AZI	2	pCF12	Plasmid_Carrier	7	0.107
100	pCF12_AZI	AZI	2	pCF12	Plasmid_Carrier	7	0.112
110	pCF12_AZI	AZI	2	pCF12	Plasmid_Carrier	7	0.119
120	pCF12_AZI	AZI	2	pCF12	Plasmid_Carrier	7	0.126
130	pCF12_AZI	AZI	2	pCF12	Plasmid_Carrier	7	0.136
140	pCF12_AZI	AZI	2	pCF12	Plasmid_Carrier	7	0.149
150	pCF12_AZI	AZI	2	pCF12	Plasmid_Carrier	7	0.16
160	pCF12_AZI	AZI	2	pCF12	Plasmid_Carrier	7	0.17
170	pCF12_AZI	AZI	2	pCF12	Plasmid_Carrier	7	0.178
180	pCF12_AZI	AZI	2	pCF12	Plasmid_Carrier	7	0.187
190	pCF12_AZI	AZI	2	pCF12	Plasmid_Carrier	7	0.198
200	pCF12_AZI	AZI	2	pCF12	Plasmid_Carrier	7	0.207
210	pCF12_AZI	AZI	2	pCF12	Plasmid_Carrier	7	0.217
220	pCF12_AZI	AZI	2	pCF12	Plasmid_Carrier	7	0.226
230	pCF12_AZI	AZI	2	pCF12	Plasmid_Carrier	7	0.233
240	pCF12_AZI	AZI	2	pCF12	Plasmid_Carrier	7	0.24
250	pCF12_AZI	AZI	2	pCF12	Plasmid_Carrier	7	0.245
260	pCF12_AZI	AZI	2	pCF12	Plasmid_Carrier	7	0.25
270	pCF12_AZI	AZI	2	pCF12	Plasmid_Carrier	7	0.252
280	pCF12_AZI	AZI	2	pCF12	Plasmid_Carrier	7	0.254
290	pCF12_AZI	AZI	2	pCF12	Plasmid_Carrier	7	0.253
300	pCF12_AZI	AZI	2	pCF12	Plasmid_Carrier	7	0.252
310	pCF12_AZI	AZI	2	pCF12	Plasmid_Carrier	7	0.247
320	pCF12_AZI	AZI	2	pCF12	Plasmid_Carrier	7	0.241
330	pCF12_AZI	AZI	2	pCF12	Plasmid_Carrier	7	0.234
340	pCF12_AZI	AZI	2	pCF12	Plasmid_Carrier	7	0.227
350	pCF12_AZI	AZI	2	pCF12	Plasmid_Carrier	7	0.217
360	pCF12_AZI	AZI	2	pCF12	Plasmid_Carrier	7	0.206
370	pCF12_AZI	AZI	2	pCF12	Plasmid_Carrier	7	0.198
380	pCF12_AZI	AZI	2	pCF12	Plasmid_Carrier	7	0.187
390	pCF12_AZI	AZI	2	pCF12	Plasmid_Carrier	7	0.176
400	pCF12_AZI	AZI	2	pCF12	Plasmid_Carrier	7	0.167
410	pCF12_AZI	AZI	2	pCF12	Plasmid_Carrier	7	0.16
420	pCF12_AZI	AZI	2	pCF12	Plasmid_Carrier	7	0.154
430	pCF12_AZI	AZI	2	pCF12	Plasmid_Carrier	7	0.149
440	pCF12_AZI	AZI	2	pCF12	Plasmid_Carrier	7	0.145
450	pCF12_AZI	AZI	2	pCF12	Plasmid_Carrier	7	0.142
460	pCF12_AZI	AZI	2	pCF12	Plasmid_Carrier	7	0.139
470	pCF12_AZI	AZI	2	pCF12	Plasmid_Carrier	7	0.137
480	pCF12_AZI	AZI	2	pCF12	Plasmid_Carrier	7	0.135
490	pCF12_AZI	AZI	2	pCF12	Plasmid_Carrier	7	0.133
500	pCF12_AZI	AZI	2	pCF12	Plasmid_Carrier	7	0.133
510	pCF12_AZI	AZI	2	pCF12	Plasmid_Carrier	7	0.132
520	pCF12_AZI	AZI	2	pCF12	Plasmid_Carrier	7	0.132
530	pCF12_AZI	AZI	2	pCF12	Plasmid_Carrier	7	0.132
540	pCF12_AZI	AZI	2	pCF12	Plasmid_Carrier	7	0.132
550	pCF12_AZI	AZI	2	pCF12	Plasmid_Carrier	7	0.132
560	pCF12_AZI	AZI	2	pCF12	Plasmid_Carrier	7	0.133
570	pCF12_AZI	AZI	2	pCF12	Plasmid_Carrier	7	0.134
580	pCF12_AZI	AZI	2	pCF12	Plasmid_Carrier	7	0.134
590	pCF12_AZI	AZI	2	pCF12	Plasmid_Carrier	7	0.134
600	pCF12_AZI	AZI	2	pCF12	Plasmid_Carrier	7	0.135
610	pCF12_AZI	AZI	2	pCF12	Plasmid_Carrier	7	0.135
620	pCF12_AZI	AZI	2	pCF12	Plasmid_Carrier	7	0.135
630	pCF12_AZI	AZI	2	pCF12	Plasmid_Carrier	7	0.135
640	pCF12_AZI	AZI	2	pCF12	Plasmid_Carrier	7	0.135
650	pCF12_AZI	AZI	2	pCF12	Plasmid_Carrier	7	0.135
660	pCF12_AZI	AZI	2	pCF12	Plasmid_Carrier	7	0.135
670	pCF12_AZI	AZI	2	pCF12	Plasmid_Carrier	7	0.135
680	pCF12_AZI	AZI	2	pCF12	Plasmid_Carrier	7	0.135
690	pCF12_AZI	AZI	2	pCF12	Plasmid_Carrier	7	0.135
700	pCF12_AZI	AZI	2	pCF12	Plasmid_Carrier	7	0.135
710	pCF12_AZI	AZI	2	pCF12	Plasmid_Carrier	7	0.135
720	pCF12_AZI	AZI	2	pCF12	Plasmid_Carrier	7	0.135
730	pCF12_AZI	AZI	2	pCF12	Plasmid_Carrier	7	0.135
740	pCF12_AZI	AZI	2	pCF12	Plasmid_Carrier	7	0.135
750	pCF12_AZI	AZI	2	pCF12	Plasmid_Carrier	7	0.135
760	pCF12_AZI	AZI	2	pCF12	Plasmid_Carrier	7	0.135
770	pCF12_AZI	AZI	2	pCF12	Plasmid_Carrier	7	0.135
780	pCF12_AZI	AZI	2	pCF12	Plasmid_Carrier	7	0.135
790	pCF12_AZI	AZI	2	pCF12	Plasmid_Carrier	7	0.135
800	pCF12_AZI	AZI	2	pCF12	Plasmid_Carrier	7	0.135
810	pCF12_AZI	AZI	2	pCF12	Plasmid_Carrier	7	0.135
820	pCF12_AZI	AZI	2	pCF12	Plasmid_Carrier	7	0.135
830	pCF12_AZI	AZI	2	pCF12	Plasmid_Carrier	7	0.134
840	pCF12_AZI	AZI	2	pCF12	Plasmid_Carrier	7	0.135
850	pCF12_AZI	AZI	2	pCF12	Plasmid_Carrier	7	0.134
860	pCF12_AZI	AZI	2	pCF12	Plasmid_Carrier	7	0.134
870	pCF12_AZI	AZI	2	pCF12	Plasmid_Carrier	7	0.134
880	pCF12_AZI	AZI	2	pCF12	Plasmid_Carrier	7	0.134
890	pCF12_AZI	AZI	2	pCF12	Plasmid_Carrier	7	0.134
900	pCF12_AZI	AZI	2	pCF12	Plasmid_Carrier	7	0.134
910	pCF12_AZI	AZI	2	pCF12	Plasmid_Carrier	7	0.134
920	pCF12_AZI	AZI	2	pCF12	Plasmid_Carrier	7	0.134
930	pCF12_AZI	AZI	2	pCF12	Plasmid_Carrier	7	0.134
940	pCF12_AZI	AZI	2	pCF12	Plasmid_Carrier	7	0.134
950	pCF12_AZI	AZI	2	pCF12	Plasmid_Carrier	7	0.134
960	pCF12_AZI	AZI	2	pCF12	Plasmid_Carrier	7	0.134
970	pCF12_AZI	AZI	2	pCF12	Plasmid_Carrier	7	0.134
980	pCF12_AZI	AZI	2	pCF12	Plasmid_Carrier	7	0.134
990	pCF12_AZI	AZI	2	pCF12	Plasmid_Carrier	7	0.134
1000	pCF12_AZI	AZI	2	pCF12	Plasmid_Carrier	7	0.134
1010	pCF12_AZI	AZI	2	pCF12	Plasmid_Carrier	7	0.134
1020	pCF12_AZI	AZI	2	pCF12	Plasmid_Carrier	7	0.134
1030	pCF12_AZI	AZI	2	pCF12	Plasmid_Carrier	7	0.134
1040	pCF12_AZI	AZI	2	pCF12	Plasmid_Carrier	7	0.134
1050	pCF12_AZI	AZI	2	pCF12	Plasmid_Carrier	7	0.134
1060	pCF12_AZI	AZI	2	pCF12	Plasmid_Carrier	7	0.134
1070	pCF12_AZI	AZI	2	pCF12	Plasmid_Carrier	7	0.134
1080	pCF12_AZI	AZI	2	pCF12	Plasmid_Carrier	7	0.134
1090	pCF12_AZI	AZI	2	pCF12	Plasmid_Carrier	7	0.134
1100	pCF12_AZI	AZI	2	pCF12	Plasmid_Carrier	7	0.134
1110	pCF12_AZI	AZI	2	pCF12	Plasmid_Carrier	7	0.134
1120	pCF12_AZI	AZI	2	pCF12	Plasmid_Carrier	7	0.134
1130	pCF12_AZI	AZI	2	pCF12	Plasmid_Carrier	7	0.134
1140	pCF12_AZI	AZI	2	pCF12	Plasmid_Carrier	7	0.134
1150	pCF12_AZI	AZI	2	pCF12	Plasmid_Carrier	7	0.134
1160	pCF12_AZI	AZI	2	pCF12	Plasmid_Carrier	7	0.134
1170	pCF12_AZI	AZI	2	pCF12	Plasmid_Carrier	7	0.134
1180	pCF12_AZI	AZI	2	pCF12	Plasmid_Carrier	7	0.134
1190	pCF12_AZI	AZI	2	pCF12	Plasmid_Carrier	7	0.133
1200	pCF12_AZI	AZI	2	pCF12	Plasmid_Carrier	7	0.134
1210	pCF12_AZI	AZI	2	pCF12	Plasmid_Carrier	7	0.134
1220	pCF12_AZI	AZI	2	pCF12	Plasmid_Carrier	7	0.134
1230	pCF12_AZI	AZI	2	pCF12	Plasmid_Carrier	7	0.134
1240	pCF12_AZI	AZI	2	pCF12	Plasmid_Carrier	7	0.134
1250	pCF12_AZI	AZI	2	pCF12	Plasmid_Carrier	7	0.134
1260	pCF12_AZI	AZI	2	pCF12	Plasmid_Carrier	7	0.133
1270	pCF12_AZI	AZI	2	pCF12	Plasmid_Carrier	7	0.134
1280	pCF12_AZI	AZI	2	pCF12	Plasmid_Carrier	7	0.134
1290	pCF12_AZI	AZI	2	pCF12	Plasmid_Carrier	7	0.133
1300	pCF12_AZI	AZI	2	pCF12	Plasmid_Carrier	7	0.134
1310	pCF12_AZI	AZI	2	pCF12	Plasmid_Carrier	7	0.133
1320	pCF12_AZI	AZI	2	pCF12	Plasmid_Carrier	7	0.134
1330	pCF12_AZI	AZI	2	pCF12	Plasmid_Carrier	7	0.133
1340	pCF12_AZI	AZI	2	pCF12	Plasmid_Carrier	7	0.133
1350	pCF12_AZI	AZI	2	pCF12	Plasmid_Carrier	7	0.133
1360	pCF12_AZI	AZI	2	pCF12	Plasmid_Carrier	7	0.133
1370	pCF12_AZI	AZI	2	pCF12	Plasmid_Carrier	7	0.133
1380	pCF12_AZI	AZI	2	pCF12	Plasmid_Carrier	7	0.133
1390	pCF12_AZI	AZI	2	pCF12	Plasmid_Carrier	7	0.133
1400	pCF12_AZI	AZI	2	pCF12	Plasmid_Carrier	7	0.133
1410	pCF12_AZI	AZI	2	pCF12	Plasmid_Carrier	7	0.133
1420	pCF12_AZI	AZI	2	pCF12	Plasmid_Carrier	7	0.133
1430	pCF12_AZI	AZI	2	pCF12	Plasmid_Carrier	7	0.133
1440	pCF12_AZI	AZI	2	pCF12	Plasmid_Carrier	7	0.133
0	pCF12_AZI	AZI	2	pCF12	Plasmid_Carrier	8	0.119
10	pCF12_AZI	AZI	2	pCF12	Plasmid_Carrier	8	0.098
20	pCF12_AZI	AZI	2	pCF12	Plasmid_Carrier	8	0.096
30	pCF12_AZI	AZI	2	pCF12	Plasmid_Carrier	8	0.097
40	pCF12_AZI	AZI	2	pCF12	Plasmid_Carrier	8	0.098
50	pCF12_AZI	AZI	2	pCF12	Plasmid_Carrier	8	0.1
60	pCF12_AZI	AZI	2	pCF12	Plasmid_Carrier	8	0.102
70	pCF12_AZI	AZI	2	pCF12	Plasmid_Carrier	8	0.105
80	pCF12_AZI	AZI	2	pCF12	Plasmid_Carrier	8	0.11
90	pCF12_AZI	AZI	2	pCF12	Plasmid_Carrier	8	0.117
100	pCF12_AZI	AZI	2	pCF12	Plasmid_Carrier	8	0.126
110	pCF12_AZI	AZI	2	pCF12	Plasmid_Carrier	8	0.136
120	pCF12_AZI	AZI	2	pCF12	Plasmid_Carrier	8	0.149
130	pCF12_AZI	AZI	2	pCF12	Plasmid_Carrier	8	0.16
140	pCF12_AZI	AZI	2	pCF12	Plasmid_Carrier	8	0.17
150	pCF12_AZI	AZI	2	pCF12	Plasmid_Carrier	8	0.179
160	pCF12_AZI	AZI	2	pCF12	Plasmid_Carrier	8	0.19
170	pCF12_AZI	AZI	2	pCF12	Plasmid_Carrier	8	0.2
180	pCF12_AZI	AZI	2	pCF12	Plasmid_Carrier	8	0.214
190	pCF12_AZI	AZI	2	pCF12	Plasmid_Carrier	8	0.226
200	pCF12_AZI	AZI	2	pCF12	Plasmid_Carrier	8	0.235
210	pCF12_AZI	AZI	2	pCF12	Plasmid_Carrier	8	0.246
220	pCF12_AZI	AZI	2	pCF12	Plasmid_Carrier	8	0.255
230	pCF12_AZI	AZI	2	pCF12	Plasmid_Carrier	8	0.264
240	pCF12_AZI	AZI	2	pCF12	Plasmid_Carrier	8	0.271
250	pCF12_AZI	AZI	2	pCF12	Plasmid_Carrier	8	0.279
260	pCF12_AZI	AZI	2	pCF12	Plasmid_Carrier	8	0.284
270	pCF12_AZI	AZI	2	pCF12	Plasmid_Carrier	8	0.288
280	pCF12_AZI	AZI	2	pCF12	Plasmid_Carrier	8	0.293
290	pCF12_AZI	AZI	2	pCF12	Plasmid_Carrier	8	0.297
300	pCF12_AZI	AZI	2	pCF12	Plasmid_Carrier	8	0.301
310	pCF12_AZI	AZI	2	pCF12	Plasmid_Carrier	8	0.303
320	pCF12_AZI	AZI	2	pCF12	Plasmid_Carrier	8	0.305
330	pCF12_AZI	AZI	2	pCF12	Plasmid_Carrier	8	0.305
340	pCF12_AZI	AZI	2	pCF12	Plasmid_Carrier	8	0.304
350	pCF12_AZI	AZI	2	pCF12	Plasmid_Carrier	8	0.303
360	pCF12_AZI	AZI	2	pCF12	Plasmid_Carrier	8	0.3
370	pCF12_AZI	AZI	2	pCF12	Plasmid_Carrier	8	0.296
380	pCF12_AZI	AZI	2	pCF12	Plasmid_Carrier	8	0.29
390	pCF12_AZI	AZI	2	pCF12	Plasmid_Carrier	8	0.285
400	pCF12_AZI	AZI	2	pCF12	Plasmid_Carrier	8	0.28
410	pCF12_AZI	AZI	2	pCF12	Plasmid_Carrier	8	0.272
420	pCF12_AZI	AZI	2	pCF12	Plasmid_Carrier	8	0.264
430	pCF12_AZI	AZI	2	pCF12	Plasmid_Carrier	8	0.257
440	pCF12_AZI	AZI	2	pCF12	Plasmid_Carrier	8	0.249
450	pCF12_AZI	AZI	2	pCF12	Plasmid_Carrier	8	0.241
460	pCF12_AZI	AZI	2	pCF12	Plasmid_Carrier	8	0.233
470	pCF12_AZI	AZI	2	pCF12	Plasmid_Carrier	8	0.228
480	pCF12_AZI	AZI	2	pCF12	Plasmid_Carrier	8	0.223
490	pCF12_AZI	AZI	2	pCF12	Plasmid_Carrier	8	0.219
500	pCF12_AZI	AZI	2	pCF12	Plasmid_Carrier	8	0.214
510	pCF12_AZI	AZI	2	pCF12	Plasmid_Carrier	8	0.208
520	pCF12_AZI	AZI	2	pCF12	Plasmid_Carrier	8	0.203
530	pCF12_AZI	AZI	2	pCF12	Plasmid_Carrier	8	0.199
540	pCF12_AZI	AZI	2	pCF12	Plasmid_Carrier	8	0.194
550	pCF12_AZI	AZI	2	pCF12	Plasmid_Carrier	8	0.19
560	pCF12_AZI	AZI	2	pCF12	Plasmid_Carrier	8	0.186
570	pCF12_AZI	AZI	2	pCF12	Plasmid_Carrier	8	0.182
580	pCF12_AZI	AZI	2	pCF12	Plasmid_Carrier	8	0.18
590	pCF12_AZI	AZI	2	pCF12	Plasmid_Carrier	8	0.177
600	pCF12_AZI	AZI	2	pCF12	Plasmid_Carrier	8	0.175
610	pCF12_AZI	AZI	2	pCF12	Plasmid_Carrier	8	0.172
620	pCF12_AZI	AZI	2	pCF12	Plasmid_Carrier	8	0.17
630	pCF12_AZI	AZI	2	pCF12	Plasmid_Carrier	8	0.168
640	pCF12_AZI	AZI	2	pCF12	Plasmid_Carrier	8	0.167
650	pCF12_AZI	AZI	2	pCF12	Plasmid_Carrier	8	0.165
660	pCF12_AZI	AZI	2	pCF12	Plasmid_Carrier	8	0.165
670	pCF12_AZI	AZI	2	pCF12	Plasmid_Carrier	8	0.164
680	pCF12_AZI	AZI	2	pCF12	Plasmid_Carrier	8	0.163
690	pCF12_AZI	AZI	2	pCF12	Plasmid_Carrier	8	0.163
700	pCF12_AZI	AZI	2	pCF12	Plasmid_Carrier	8	0.163
710	pCF12_AZI	AZI	2	pCF12	Plasmid_Carrier	8	0.163
720	pCF12_AZI	AZI	2	pCF12	Plasmid_Carrier	8	0.163
730	pCF12_AZI	AZI	2	pCF12	Plasmid_Carrier	8	0.163
740	pCF12_AZI	AZI	2	pCF12	Plasmid_Carrier	8	0.163
750	pCF12_AZI	AZI	2	pCF12	Plasmid_Carrier	8	0.164
760	pCF12_AZI	AZI	2	pCF12	Plasmid_Carrier	8	0.164
770	pCF12_AZI	AZI	2	pCF12	Plasmid_Carrier	8	0.164
780	pCF12_AZI	AZI	2	pCF12	Plasmid_Carrier	8	0.165
790	pCF12_AZI	AZI	2	pCF12	Plasmid_Carrier	8	0.165
800	pCF12_AZI	AZI	2	pCF12	Plasmid_Carrier	8	0.166
810	pCF12_AZI	AZI	2	pCF12	Plasmid_Carrier	8	0.167
820	pCF12_AZI	AZI	2	pCF12	Plasmid_Carrier	8	0.167
830	pCF12_AZI	AZI	2	pCF12	Plasmid_Carrier	8	0.167
840	pCF12_AZI	AZI	2	pCF12	Plasmid_Carrier	8	0.168
850	pCF12_AZI	AZI	2	pCF12	Plasmid_Carrier	8	0.167
860	pCF12_AZI	AZI	2	pCF12	Plasmid_Carrier	8	0.167
870	pCF12_AZI	AZI	2	pCF12	Plasmid_Carrier	8	0.167
880	pCF12_AZI	AZI	2	pCF12	Plasmid_Carrier	8	0.167
890	pCF12_AZI	AZI	2	pCF12	Plasmid_Carrier	8	0.167
900	pCF12_AZI	AZI	2	pCF12	Plasmid_Carrier	8	0.167
910	pCF12_AZI	AZI	2	pCF12	Plasmid_Carrier	8	0.167
920	pCF12_AZI	AZI	2	pCF12	Plasmid_Carrier	8	0.167
930	pCF12_AZI	AZI	2	pCF12	Plasmid_Carrier	8	0.167
940	pCF12_AZI	AZI	2	pCF12	Plasmid_Carrier	8	0.167
950	pCF12_AZI	AZI	2	pCF12	Plasmid_Carrier	8	0.167
960	pCF12_AZI	AZI	2	pCF12	Plasmid_Carrier	8	0.166
970	pCF12_AZI	AZI	2	pCF12	Plasmid_Carrier	8	0.166
980	pCF12_AZI	AZI	2	pCF12	Plasmid_Carrier	8	0.167
990	pCF12_AZI	AZI	2	pCF12	Plasmid_Carrier	8	0.166
1000	pCF12_AZI	AZI	2	pCF12	Plasmid_Carrier	8	0.166
1010	pCF12_AZI	AZI	2	pCF12	Plasmid_Carrier	8	0.166
1020	pCF12_AZI	AZI	2	pCF12	Plasmid_Carrier	8	0.166
1030	pCF12_AZI	AZI	2	pCF12	Plasmid_Carrier	8	0.166
1040	pCF12_AZI	AZI	2	pCF12	Plasmid_Carrier	8	0.166
1050	pCF12_AZI	AZI	2	pCF12	Plasmid_Carrier	8	0.165
1060	pCF12_AZI	AZI	2	pCF12	Plasmid_Carrier	8	0.166
1070	pCF12_AZI	AZI	2	pCF12	Plasmid_Carrier	8	0.166
1080	pCF12_AZI	AZI	2	pCF12	Plasmid_Carrier	8	0.166
1090	pCF12_AZI	AZI	2	pCF12	Plasmid_Carrier	8	0.165
1100	pCF12_AZI	AZI	2	pCF12	Plasmid_Carrier	8	0.165
1110	pCF12_AZI	AZI	2	pCF12	Plasmid_Carrier	8	0.165
1120	pCF12_AZI	AZI	2	pCF12	Plasmid_Carrier	8	0.165
1130	pCF12_AZI	AZI	2	pCF12	Plasmid_Carrier	8	0.165
1140	pCF12_AZI	AZI	2	pCF12	Plasmid_Carrier	8	0.165
1150	pCF12_AZI	AZI	2	pCF12	Plasmid_Carrier	8	0.165
1160	pCF12_AZI	AZI	2	pCF12	Plasmid_Carrier	8	0.165
1170	pCF12_AZI	AZI	2	pCF12	Plasmid_Carrier	8	0.165
1180	pCF12_AZI	AZI	2	pCF12	Plasmid_Carrier	8	0.165
1190	pCF12_AZI	AZI	2	pCF12	Plasmid_Carrier	8	0.165
1200	pCF12_AZI	AZI	2	pCF12	Plasmid_Carrier	8	0.165
1210	pCF12_AZI	AZI	2	pCF12	Plasmid_Carrier	8	0.165
1220	pCF12_AZI	AZI	2	pCF12	Plasmid_Carrier	8	0.165
1230	pCF12_AZI	AZI	2	pCF12	Plasmid_Carrier	8	0.165
1240	pCF12_AZI	AZI	2	pCF12	Plasmid_Carrier	8	0.165
1250	pCF12_AZI	AZI	2	pCF12	Plasmid_Carrier	8	0.165
1260	pCF12_AZI	AZI	2	pCF12	Plasmid_Carrier	8	0.165
1270	pCF12_AZI	AZI	2	pCF12	Plasmid_Carrier	8	0.165
1280	pCF12_AZI	AZI	2	pCF12	Plasmid_Carrier	8	0.165
1290	pCF12_AZI	AZI	2	pCF12	Plasmid_Carrier	8	0.165
1300	pCF12_AZI	AZI	2	pCF12	Plasmid_Carrier	8	0.165
1310	pCF12_AZI	AZI	2	pCF12	Plasmid_Carrier	8	0.165
1320	pCF12_AZI	AZI	2	pCF12	Plasmid_Carrier	8	0.165
1330	pCF12_AZI	AZI	2	pCF12	Plasmid_Carrier	8	0.165
1340	pCF12_AZI	AZI	2	pCF12	Plasmid_Carrier	8	0.165
1350	pCF12_AZI	AZI	2	pCF12	Plasmid_Carrier	8	0.165
1360	pCF12_AZI	AZI	2	pCF12	Plasmid_Carrier	8	0.165
1370	pCF12_AZI	AZI	2	pCF12	Plasmid_Carrier	8	0.165
1380	pCF12_AZI	AZI	2	pCF12	Plasmid_Carrier	8	0.165
1390	pCF12_AZI	AZI	2	pCF12	Plasmid_Carrier	8	0.165
1400	pCF12_AZI	AZI	2	pCF12	Plasmid_Carrier	8	0.165
1410	pCF12_AZI	AZI	2	pCF12	Plasmid_Carrier	8	0.165
1420	pCF12_AZI	AZI	2	pCF12	Plasmid_Carrier	8	0.165
1430	pCF12_AZI	AZI	2	pCF12	Plasmid_Carrier	8	0.165
1440	pCF12_AZI	AZI	2	pCF12	Plasmid_Carrier	8	0.165
0	pCF12_AZI	AZI	2	pCF12	Plasmid_Carrier	9	0.114
10	pCF12_AZI	AZI	2	pCF12	Plasmid_Carrier	9	0.098
20	pCF12_AZI	AZI	2	pCF12	Plasmid_Carrier	9	0.097
30	pCF12_AZI	AZI	2	pCF12	Plasmid_Carrier	9	0.098
40	pCF12_AZI	AZI	2	pCF12	Plasmid_Carrier	9	0.099
50	pCF12_AZI	AZI	2	pCF12	Plasmid_Carrier	9	0.1
60	pCF12_AZI	AZI	2	pCF12	Plasmid_Carrier	9	0.102
70	pCF12_AZI	AZI	2	pCF12	Plasmid_Carrier	9	0.105
80	pCF12_AZI	AZI	2	pCF12	Plasmid_Carrier	9	0.108
90	pCF12_AZI	AZI	2	pCF12	Plasmid_Carrier	9	0.113
100	pCF12_AZI	AZI	2	pCF12	Plasmid_Carrier	9	0.121
110	pCF12_AZI	AZI	2	pCF12	Plasmid_Carrier	9	0.129
120	pCF12_AZI	AZI	2	pCF12	Plasmid_Carrier	9	0.14
130	pCF12_AZI	AZI	2	pCF12	Plasmid_Carrier	9	0.153
140	pCF12_AZI	AZI	2	pCF12	Plasmid_Carrier	9	0.166
150	pCF12_AZI	AZI	2	pCF12	Plasmid_Carrier	9	0.178
160	pCF12_AZI	AZI	2	pCF12	Plasmid_Carrier	9	0.191
170	pCF12_AZI	AZI	2	pCF12	Plasmid_Carrier	9	0.203
180	pCF12_AZI	AZI	2	pCF12	Plasmid_Carrier	9	0.215
190	pCF12_AZI	AZI	2	pCF12	Plasmid_Carrier	9	0.226
200	pCF12_AZI	AZI	2	pCF12	Plasmid_Carrier	9	0.238
210	pCF12_AZI	AZI	2	pCF12	Plasmid_Carrier	9	0.252
220	pCF12_AZI	AZI	2	pCF12	Plasmid_Carrier	9	0.264
230	pCF12_AZI	AZI	2	pCF12	Plasmid_Carrier	9	0.275
240	pCF12_AZI	AZI	2	pCF12	Plasmid_Carrier	9	0.284
250	pCF12_AZI	AZI	2	pCF12	Plasmid_Carrier	9	0.295
260	pCF12_AZI	AZI	2	pCF12	Plasmid_Carrier	9	0.303
270	pCF12_AZI	AZI	2	pCF12	Plasmid_Carrier	9	0.312
280	pCF12_AZI	AZI	2	pCF12	Plasmid_Carrier	9	0.319
290	pCF12_AZI	AZI	2	pCF12	Plasmid_Carrier	9	0.326
300	pCF12_AZI	AZI	2	pCF12	Plasmid_Carrier	9	0.333
310	pCF12_AZI	AZI	2	pCF12	Plasmid_Carrier	9	0.339
320	pCF12_AZI	AZI	2	pCF12	Plasmid_Carrier	9	0.346
330	pCF12_AZI	AZI	2	pCF12	Plasmid_Carrier	9	0.351
340	pCF12_AZI	AZI	2	pCF12	Plasmid_Carrier	9	0.358
350	pCF12_AZI	AZI	2	pCF12	Plasmid_Carrier	9	0.361
360	pCF12_AZI	AZI	2	pCF12	Plasmid_Carrier	9	0.364
370	pCF12_AZI	AZI	2	pCF12	Plasmid_Carrier	9	0.367
380	pCF12_AZI	AZI	2	pCF12	Plasmid_Carrier	9	0.372
390	pCF12_AZI	AZI	2	pCF12	Plasmid_Carrier	9	0.376
400	pCF12_AZI	AZI	2	pCF12	Plasmid_Carrier	9	0.378
410	pCF12_AZI	AZI	2	pCF12	Plasmid_Carrier	9	0.381
420	pCF12_AZI	AZI	2	pCF12	Plasmid_Carrier	9	0.383
430	pCF12_AZI	AZI	2	pCF12	Plasmid_Carrier	9	0.387
440	pCF12_AZI	AZI	2	pCF12	Plasmid_Carrier	9	0.388
450	pCF12_AZI	AZI	2	pCF12	Plasmid_Carrier	9	0.39
460	pCF12_AZI	AZI	2	pCF12	Plasmid_Carrier	9	0.392
470	pCF12_AZI	AZI	2	pCF12	Plasmid_Carrier	9	0.392
480	pCF12_AZI	AZI	2	pCF12	Plasmid_Carrier	9	0.393
490	pCF12_AZI	AZI	2	pCF12	Plasmid_Carrier	9	0.393
500	pCF12_AZI	AZI	2	pCF12	Plasmid_Carrier	9	0.394
510	pCF12_AZI	AZI	2	pCF12	Plasmid_Carrier	9	0.394
520	pCF12_AZI	AZI	2	pCF12	Plasmid_Carrier	9	0.393
530	pCF12_AZI	AZI	2	pCF12	Plasmid_Carrier	9	0.392
540	pCF12_AZI	AZI	2	pCF12	Plasmid_Carrier	9	0.39
550	pCF12_AZI	AZI	2	pCF12	Plasmid_Carrier	9	0.388
560	pCF12_AZI	AZI	2	pCF12	Plasmid_Carrier	9	0.383
570	pCF12_AZI	AZI	2	pCF12	Plasmid_Carrier	9	0.378
580	pCF12_AZI	AZI	2	pCF12	Plasmid_Carrier	9	0.375
590	pCF12_AZI	AZI	2	pCF12	Plasmid_Carrier	9	0.372
600	pCF12_AZI	AZI	2	pCF12	Plasmid_Carrier	9	0.369
610	pCF12_AZI	AZI	2	pCF12	Plasmid_Carrier	9	0.365
620	pCF12_AZI	AZI	2	pCF12	Plasmid_Carrier	9	0.359
630	pCF12_AZI	AZI	2	pCF12	Plasmid_Carrier	9	0.357
640	pCF12_AZI	AZI	2	pCF12	Plasmid_Carrier	9	0.353
650	pCF12_AZI	AZI	2	pCF12	Plasmid_Carrier	9	0.351
660	pCF12_AZI	AZI	2	pCF12	Plasmid_Carrier	9	0.348
670	pCF12_AZI	AZI	2	pCF12	Plasmid_Carrier	9	0.346
680	pCF12_AZI	AZI	2	pCF12	Plasmid_Carrier	9	0.343
690	pCF12_AZI	AZI	2	pCF12	Plasmid_Carrier	9	0.34
700	pCF12_AZI	AZI	2	pCF12	Plasmid_Carrier	9	0.339
710	pCF12_AZI	AZI	2	pCF12	Plasmid_Carrier	9	0.337
720	pCF12_AZI	AZI	2	pCF12	Plasmid_Carrier	9	0.335
730	pCF12_AZI	AZI	2	pCF12	Plasmid_Carrier	9	0.334
740	pCF12_AZI	AZI	2	pCF12	Plasmid_Carrier	9	0.332
750	pCF12_AZI	AZI	2	pCF12	Plasmid_Carrier	9	0.331
760	pCF12_AZI	AZI	2	pCF12	Plasmid_Carrier	9	0.329
770	pCF12_AZI	AZI	2	pCF12	Plasmid_Carrier	9	0.328
780	pCF12_AZI	AZI	2	pCF12	Plasmid_Carrier	9	0.327
790	pCF12_AZI	AZI	2	pCF12	Plasmid_Carrier	9	0.326
800	pCF12_AZI	AZI	2	pCF12	Plasmid_Carrier	9	0.325
810	pCF12_AZI	AZI	2	pCF12	Plasmid_Carrier	9	0.323
820	pCF12_AZI	AZI	2	pCF12	Plasmid_Carrier	9	0.323
830	pCF12_AZI	AZI	2	pCF12	Plasmid_Carrier	9	0.322
840	pCF12_AZI	AZI	2	pCF12	Plasmid_Carrier	9	0.321
850	pCF12_AZI	AZI	2	pCF12	Plasmid_Carrier	9	0.32
860	pCF12_AZI	AZI	2	pCF12	Plasmid_Carrier	9	0.319
870	pCF12_AZI	AZI	2	pCF12	Plasmid_Carrier	9	0.318
880	pCF12_AZI	AZI	2	pCF12	Plasmid_Carrier	9	0.318
890	pCF12_AZI	AZI	2	pCF12	Plasmid_Carrier	9	0.317
900	pCF12_AZI	AZI	2	pCF12	Plasmid_Carrier	9	0.317
910	pCF12_AZI	AZI	2	pCF12	Plasmid_Carrier	9	0.316
920	pCF12_AZI	AZI	2	pCF12	Plasmid_Carrier	9	0.316
930	pCF12_AZI	AZI	2	pCF12	Plasmid_Carrier	9	0.315
940	pCF12_AZI	AZI	2	pCF12	Plasmid_Carrier	9	0.314
950	pCF12_AZI	AZI	2	pCF12	Plasmid_Carrier	9	0.314
960	pCF12_AZI	AZI	2	pCF12	Plasmid_Carrier	9	0.313
970	pCF12_AZI	AZI	2	pCF12	Plasmid_Carrier	9	0.313
980	pCF12_AZI	AZI	2	pCF12	Plasmid_Carrier	9	0.312
990	pCF12_AZI	AZI	2	pCF12	Plasmid_Carrier	9	0.312
1000	pCF12_AZI	AZI	2	pCF12	Plasmid_Carrier	9	0.311
1010	pCF12_AZI	AZI	2	pCF12	Plasmid_Carrier	9	0.31
1020	pCF12_AZI	AZI	2	pCF12	Plasmid_Carrier	9	0.309
1030	pCF12_AZI	AZI	2	pCF12	Plasmid_Carrier	9	0.309
1040	pCF12_AZI	AZI	2	pCF12	Plasmid_Carrier	9	0.309
1050	pCF12_AZI	AZI	2	pCF12	Plasmid_Carrier	9	0.308
1060	pCF12_AZI	AZI	2	pCF12	Plasmid_Carrier	9	0.307
1070	pCF12_AZI	AZI	2	pCF12	Plasmid_Carrier	9	0.307
1080	pCF12_AZI	AZI	2	pCF12	Plasmid_Carrier	9	0.306
1090	pCF12_AZI	AZI	2	pCF12	Plasmid_Carrier	9	0.306
1100	pCF12_AZI	AZI	2	pCF12	Plasmid_Carrier	9	0.305
1110	pCF12_AZI	AZI	2	pCF12	Plasmid_Carrier	9	0.305
1120	pCF12_AZI	AZI	2	pCF12	Plasmid_Carrier	9	0.304
1130	pCF12_AZI	AZI	2	pCF12	Plasmid_Carrier	9	0.303
1140	pCF12_AZI	AZI	2	pCF12	Plasmid_Carrier	9	0.303
1150	pCF12_AZI	AZI	2	pCF12	Plasmid_Carrier	9	0.302
1160	pCF12_AZI	AZI	2	pCF12	Plasmid_Carrier	9	0.301
1170	pCF12_AZI	AZI	2	pCF12	Plasmid_Carrier	9	0.301
1180	pCF12_AZI	AZI	2	pCF12	Plasmid_Carrier	9	0.3
1190	pCF12_AZI	AZI	2	pCF12	Plasmid_Carrier	9	0.3
1200	pCF12_AZI	AZI	2	pCF12	Plasmid_Carrier	9	0.3
1210	pCF12_AZI	AZI	2	pCF12	Plasmid_Carrier	9	0.299
1220	pCF12_AZI	AZI	2	pCF12	Plasmid_Carrier	9	0.299
1230	pCF12_AZI	AZI	2	pCF12	Plasmid_Carrier	9	0.298
1240	pCF12_AZI	AZI	2	pCF12	Plasmid_Carrier	9	0.298
1250	pCF12_AZI	AZI	2	pCF12	Plasmid_Carrier	9	0.297
1260	pCF12_AZI	AZI	2	pCF12	Plasmid_Carrier	9	0.297
1270	pCF12_AZI	AZI	2	pCF12	Plasmid_Carrier	9	0.296
1280	pCF12_AZI	AZI	2	pCF12	Plasmid_Carrier	9	0.296
1290	pCF12_AZI	AZI	2	pCF12	Plasmid_Carrier	9	0.296
1300	pCF12_AZI	AZI	2	pCF12	Plasmid_Carrier	9	0.296
1310	pCF12_AZI	AZI	2	pCF12	Plasmid_Carrier	9	0.295
1320	pCF12_AZI	AZI	2	pCF12	Plasmid_Carrier	9	0.295
1330	pCF12_AZI	AZI	2	pCF12	Plasmid_Carrier	9	0.295
1340	pCF12_AZI	AZI	2	pCF12	Plasmid_Carrier	9	0.294
1350	pCF12_AZI	AZI	2	pCF12	Plasmid_Carrier	9	0.294
1360	pCF12_AZI	AZI	2	pCF12	Plasmid_Carrier	9	0.294
1370	pCF12_AZI	AZI	2	pCF12	Plasmid_Carrier	9	0.294
1380	pCF12_AZI	AZI	2	pCF12	Plasmid_Carrier	9	0.293
1390	pCF12_AZI	AZI	2	pCF12	Plasmid_Carrier	9	0.293
1400	pCF12_AZI	AZI	2	pCF12	Plasmid_Carrier	9	0.293
1410	pCF12_AZI	AZI	2	pCF12	Plasmid_Carrier	9	0.293
1420	pCF12_AZI	AZI	2	pCF12	Plasmid_Carrier	9	0.293
1430	pCF12_AZI	AZI	2	pCF12	Plasmid_Carrier	9	0.292
1440	pCF12_AZI	AZI	2	pCF12	Plasmid_Carrier	9	0.292
0	pCF12_AZI	AZI	2	pCF12	Plasmid_Carrier	10	0.116
10	pCF12_AZI	AZI	2	pCF12	Plasmid_Carrier	10	0.102
20	pCF12_AZI	AZI	2	pCF12	Plasmid_Carrier	10	0.1
30	pCF12_AZI	AZI	2	pCF12	Plasmid_Carrier	10	0.101
40	pCF12_AZI	AZI	2	pCF12	Plasmid_Carrier	10	0.102
50	pCF12_AZI	AZI	2	pCF12	Plasmid_Carrier	10	0.104
60	pCF12_AZI	AZI	2	pCF12	Plasmid_Carrier	10	0.107
70	pCF12_AZI	AZI	2	pCF12	Plasmid_Carrier	10	0.111
80	pCF12_AZI	AZI	2	pCF12	Plasmid_Carrier	10	0.118
90	pCF12_AZI	AZI	2	pCF12	Plasmid_Carrier	10	0.127
100	pCF12_AZI	AZI	2	pCF12	Plasmid_Carrier	10	0.139
110	pCF12_AZI	AZI	2	pCF12	Plasmid_Carrier	10	0.151
120	pCF12_AZI	AZI	2	pCF12	Plasmid_Carrier	10	0.164
130	pCF12_AZI	AZI	2	pCF12	Plasmid_Carrier	10	0.177
140	pCF12_AZI	AZI	2	pCF12	Plasmid_Carrier	10	0.19
150	pCF12_AZI	AZI	2	pCF12	Plasmid_Carrier	10	0.202
160	pCF12_AZI	AZI	2	pCF12	Plasmid_Carrier	10	0.216
170	pCF12_AZI	AZI	2	pCF12	Plasmid_Carrier	10	0.226
180	pCF12_AZI	AZI	2	pCF12	Plasmid_Carrier	10	0.239
190	pCF12_AZI	AZI	2	pCF12	Plasmid_Carrier	10	0.251
200	pCF12_AZI	AZI	2	pCF12	Plasmid_Carrier	10	0.26
210	pCF12_AZI	AZI	2	pCF12	Plasmid_Carrier	10	0.266
220	pCF12_AZI	AZI	2	pCF12	Plasmid_Carrier	10	0.276
230	pCF12_AZI	AZI	2	pCF12	Plasmid_Carrier	10	0.284
240	pCF12_AZI	AZI	2	pCF12	Plasmid_Carrier	10	0.295
250	pCF12_AZI	AZI	2	pCF12	Plasmid_Carrier	10	0.302
260	pCF12_AZI	AZI	2	pCF12	Plasmid_Carrier	10	0.308
270	pCF12_AZI	AZI	2	pCF12	Plasmid_Carrier	10	0.316
280	pCF12_AZI	AZI	2	pCF12	Plasmid_Carrier	10	0.325
290	pCF12_AZI	AZI	2	pCF12	Plasmid_Carrier	10	0.333
300	pCF12_AZI	AZI	2	pCF12	Plasmid_Carrier	10	0.338
310	pCF12_AZI	AZI	2	pCF12	Plasmid_Carrier	10	0.343
320	pCF12_AZI	AZI	2	pCF12	Plasmid_Carrier	10	0.348
330	pCF12_AZI	AZI	2	pCF12	Plasmid_Carrier	10	0.351
340	pCF12_AZI	AZI	2	pCF12	Plasmid_Carrier	10	0.356
350	pCF12_AZI	AZI	2	pCF12	Plasmid_Carrier	10	0.36
360	pCF12_AZI	AZI	2	pCF12	Plasmid_Carrier	10	0.364
370	pCF12_AZI	AZI	2	pCF12	Plasmid_Carrier	10	0.368
380	pCF12_AZI	AZI	2	pCF12	Plasmid_Carrier	10	0.373
390	pCF12_AZI	AZI	2	pCF12	Plasmid_Carrier	10	0.378
400	pCF12_AZI	AZI	2	pCF12	Plasmid_Carrier	10	0.381
410	pCF12_AZI	AZI	2	pCF12	Plasmid_Carrier	10	0.384
420	pCF12_AZI	AZI	2	pCF12	Plasmid_Carrier	10	0.386
430	pCF12_AZI	AZI	2	pCF12	Plasmid_Carrier	10	0.389
440	pCF12_AZI	AZI	2	pCF12	Plasmid_Carrier	10	0.393
450	pCF12_AZI	AZI	2	pCF12	Plasmid_Carrier	10	0.394
460	pCF12_AZI	AZI	2	pCF12	Plasmid_Carrier	10	0.398
470	pCF12_AZI	AZI	2	pCF12	Plasmid_Carrier	10	0.4
480	pCF12_AZI	AZI	2	pCF12	Plasmid_Carrier	10	0.4
490	pCF12_AZI	AZI	2	pCF12	Plasmid_Carrier	10	0.401
500	pCF12_AZI	AZI	2	pCF12	Plasmid_Carrier	10	0.401
510	pCF12_AZI	AZI	2	pCF12	Plasmid_Carrier	10	0.402
520	pCF12_AZI	AZI	2	pCF12	Plasmid_Carrier	10	0.403
530	pCF12_AZI	AZI	2	pCF12	Plasmid_Carrier	10	0.406
540	pCF12_AZI	AZI	2	pCF12	Plasmid_Carrier	10	0.405
550	pCF12_AZI	AZI	2	pCF12	Plasmid_Carrier	10	0.407
560	pCF12_AZI	AZI	2	pCF12	Plasmid_Carrier	10	0.407
570	pCF12_AZI	AZI	2	pCF12	Plasmid_Carrier	10	0.407
580	pCF12_AZI	AZI	2	pCF12	Plasmid_Carrier	10	0.408
590	pCF12_AZI	AZI	2	pCF12	Plasmid_Carrier	10	0.408
600	pCF12_AZI	AZI	2	pCF12	Plasmid_Carrier	10	0.409
610	pCF12_AZI	AZI	2	pCF12	Plasmid_Carrier	10	0.409
620	pCF12_AZI	AZI	2	pCF12	Plasmid_Carrier	10	0.409
630	pCF12_AZI	AZI	2	pCF12	Plasmid_Carrier	10	0.41
640	pCF12_AZI	AZI	2	pCF12	Plasmid_Carrier	10	0.41
650	pCF12_AZI	AZI	2	pCF12	Plasmid_Carrier	10	0.411
660	pCF12_AZI	AZI	2	pCF12	Plasmid_Carrier	10	0.411
670	pCF12_AZI	AZI	2	pCF12	Plasmid_Carrier	10	0.411
680	pCF12_AZI	AZI	2	pCF12	Plasmid_Carrier	10	0.41
690	pCF12_AZI	AZI	2	pCF12	Plasmid_Carrier	10	0.41
700	pCF12_AZI	AZI	2	pCF12	Plasmid_Carrier	10	0.41
710	pCF12_AZI	AZI	2	pCF12	Plasmid_Carrier	10	0.41
720	pCF12_AZI	AZI	2	pCF12	Plasmid_Carrier	10	0.41
730	pCF12_AZI	AZI	2	pCF12	Plasmid_Carrier	10	0.409
740	pCF12_AZI	AZI	2	pCF12	Plasmid_Carrier	10	0.411
750	pCF12_AZI	AZI	2	pCF12	Plasmid_Carrier	10	0.41
760	pCF12_AZI	AZI	2	pCF12	Plasmid_Carrier	10	0.409
770	pCF12_AZI	AZI	2	pCF12	Plasmid_Carrier	10	0.409
780	pCF12_AZI	AZI	2	pCF12	Plasmid_Carrier	10	0.41
790	pCF12_AZI	AZI	2	pCF12	Plasmid_Carrier	10	0.408
800	pCF12_AZI	AZI	2	pCF12	Plasmid_Carrier	10	0.407
810	pCF12_AZI	AZI	2	pCF12	Plasmid_Carrier	10	0.408
820	pCF12_AZI	AZI	2	pCF12	Plasmid_Carrier	10	0.407
830	pCF12_AZI	AZI	2	pCF12	Plasmid_Carrier	10	0.406
840	pCF12_AZI	AZI	2	pCF12	Plasmid_Carrier	10	0.405
850	pCF12_AZI	AZI	2	pCF12	Plasmid_Carrier	10	0.405
860	pCF12_AZI	AZI	2	pCF12	Plasmid_Carrier	10	0.403
870	pCF12_AZI	AZI	2	pCF12	Plasmid_Carrier	10	0.403
880	pCF12_AZI	AZI	2	pCF12	Plasmid_Carrier	10	0.402
890	pCF12_AZI	AZI	2	pCF12	Plasmid_Carrier	10	0.401
900	pCF12_AZI	AZI	2	pCF12	Plasmid_Carrier	10	0.4
910	pCF12_AZI	AZI	2	pCF12	Plasmid_Carrier	10	0.4
920	pCF12_AZI	AZI	2	pCF12	Plasmid_Carrier	10	0.398
930	pCF12_AZI	AZI	2	pCF12	Plasmid_Carrier	10	0.396
940	pCF12_AZI	AZI	2	pCF12	Plasmid_Carrier	10	0.395
950	pCF12_AZI	AZI	2	pCF12	Plasmid_Carrier	10	0.394
960	pCF12_AZI	AZI	2	pCF12	Plasmid_Carrier	10	0.392
970	pCF12_AZI	AZI	2	pCF12	Plasmid_Carrier	10	0.391
980	pCF12_AZI	AZI	2	pCF12	Plasmid_Carrier	10	0.39
990	pCF12_AZI	AZI	2	pCF12	Plasmid_Carrier	10	0.388
1000	pCF12_AZI	AZI	2	pCF12	Plasmid_Carrier	10	0.386
1010	pCF12_AZI	AZI	2	pCF12	Plasmid_Carrier	10	0.385
1020	pCF12_AZI	AZI	2	pCF12	Plasmid_Carrier	10	0.384
1030	pCF12_AZI	AZI	2	pCF12	Plasmid_Carrier	10	0.382
1040	pCF12_AZI	AZI	2	pCF12	Plasmid_Carrier	10	0.38
1050	pCF12_AZI	AZI	2	pCF12	Plasmid_Carrier	10	0.379
1060	pCF12_AZI	AZI	2	pCF12	Plasmid_Carrier	10	0.378
1070	pCF12_AZI	AZI	2	pCF12	Plasmid_Carrier	10	0.377
1080	pCF12_AZI	AZI	2	pCF12	Plasmid_Carrier	10	0.375
1090	pCF12_AZI	AZI	2	pCF12	Plasmid_Carrier	10	0.373
1100	pCF12_AZI	AZI	2	pCF12	Plasmid_Carrier	10	0.373
1110	pCF12_AZI	AZI	2	pCF12	Plasmid_Carrier	10	0.371
1120	pCF12_AZI	AZI	2	pCF12	Plasmid_Carrier	10	0.37
1130	pCF12_AZI	AZI	2	pCF12	Plasmid_Carrier	10	0.368
1140	pCF12_AZI	AZI	2	pCF12	Plasmid_Carrier	10	0.367
1150	pCF12_AZI	AZI	2	pCF12	Plasmid_Carrier	10	0.365
1160	pCF12_AZI	AZI	2	pCF12	Plasmid_Carrier	10	0.363
1170	pCF12_AZI	AZI	2	pCF12	Plasmid_Carrier	10	0.363
1180	pCF12_AZI	AZI	2	pCF12	Plasmid_Carrier	10	0.361
1190	pCF12_AZI	AZI	2	pCF12	Plasmid_Carrier	10	0.36
1200	pCF12_AZI	AZI	2	pCF12	Plasmid_Carrier	10	0.358
1210	pCF12_AZI	AZI	2	pCF12	Plasmid_Carrier	10	0.357
1220	pCF12_AZI	AZI	2	pCF12	Plasmid_Carrier	10	0.355
1230	pCF12_AZI	AZI	2	pCF12	Plasmid_Carrier	10	0.354
1240	pCF12_AZI	AZI	2	pCF12	Plasmid_Carrier	10	0.351
1250	pCF12_AZI	AZI	2	pCF12	Plasmid_Carrier	10	0.351
1260	pCF12_AZI	AZI	2	pCF12	Plasmid_Carrier	10	0.349
1270	pCF12_AZI	AZI	2	pCF12	Plasmid_Carrier	10	0.347
1280	pCF12_AZI	AZI	2	pCF12	Plasmid_Carrier	10	0.346
1290	pCF12_AZI	AZI	2	pCF12	Plasmid_Carrier	10	0.344
1300	pCF12_AZI	AZI	2	pCF12	Plasmid_Carrier	10	0.343
1310	pCF12_AZI	AZI	2	pCF12	Plasmid_Carrier	10	0.341
1320	pCF12_AZI	AZI	2	pCF12	Plasmid_Carrier	10	0.34
1330	pCF12_AZI	AZI	2	pCF12	Plasmid_Carrier	10	0.338
1340	pCF12_AZI	AZI	2	pCF12	Plasmid_Carrier	10	0.336
1350	pCF12_AZI	AZI	2	pCF12	Plasmid_Carrier	10	0.335
1360	pCF12_AZI	AZI	2	pCF12	Plasmid_Carrier	10	0.333
1370	pCF12_AZI	AZI	2	pCF12	Plasmid_Carrier	10	0.332
1380	pCF12_AZI	AZI	2	pCF12	Plasmid_Carrier	10	0.33
1390	pCF12_AZI	AZI	2	pCF12	Plasmid_Carrier	10	0.328
1400	pCF12_AZI	AZI	2	pCF12	Plasmid_Carrier	10	0.328
1410	pCF12_AZI	AZI	2	pCF12	Plasmid_Carrier	10	0.326
1420	pCF12_AZI	AZI	2	pCF12	Plasmid_Carrier	10	0.324
1430	pCF12_AZI	AZI	2	pCF12	Plasmid_Carrier	10	0.323
1440	pCF12_AZI	AZI	2	pCF12	Plasmid_Carrier	10	0.322
0	pCF12_AZI	AZI	2	pCF12	Plasmid_Carrier	11	0.11
10	pCF12_AZI	AZI	2	pCF12	Plasmid_Carrier	11	0.094
20	pCF12_AZI	AZI	2	pCF12	Plasmid_Carrier	11	0.094
30	pCF12_AZI	AZI	2	pCF12	Plasmid_Carrier	11	0.094
40	pCF12_AZI	AZI	2	pCF12	Plasmid_Carrier	11	0.094
50	pCF12_AZI	AZI	2	pCF12	Plasmid_Carrier	11	0.095
60	pCF12_AZI	AZI	2	pCF12	Plasmid_Carrier	11	0.096
70	pCF12_AZI	AZI	2	pCF12	Plasmid_Carrier	11	0.098
80	pCF12_AZI	AZI	2	pCF12	Plasmid_Carrier	11	0.1
90	pCF12_AZI	AZI	2	pCF12	Plasmid_Carrier	11	0.103
100	pCF12_AZI	AZI	2	pCF12	Plasmid_Carrier	11	0.107
110	pCF12_AZI	AZI	2	pCF12	Plasmid_Carrier	11	0.113
120	pCF12_AZI	AZI	2	pCF12	Plasmid_Carrier	11	0.121
130	pCF12_AZI	AZI	2	pCF12	Plasmid_Carrier	11	0.131
140	pCF12_AZI	AZI	2	pCF12	Plasmid_Carrier	11	0.142
150	pCF12_AZI	AZI	2	pCF12	Plasmid_Carrier	11	0.153
160	pCF12_AZI	AZI	2	pCF12	Plasmid_Carrier	11	0.163
170	pCF12_AZI	AZI	2	pCF12	Plasmid_Carrier	11	0.173
180	pCF12_AZI	AZI	2	pCF12	Plasmid_Carrier	11	0.183
190	pCF12_AZI	AZI	2	pCF12	Plasmid_Carrier	11	0.194
200	pCF12_AZI	AZI	2	pCF12	Plasmid_Carrier	11	0.204
210	pCF12_AZI	AZI	2	pCF12	Plasmid_Carrier	11	0.215
220	pCF12_AZI	AZI	2	pCF12	Plasmid_Carrier	11	0.225
230	pCF12_AZI	AZI	2	pCF12	Plasmid_Carrier	11	0.236
240	pCF12_AZI	AZI	2	pCF12	Plasmid_Carrier	11	0.245
250	pCF12_AZI	AZI	2	pCF12	Plasmid_Carrier	11	0.255
260	pCF12_AZI	AZI	2	pCF12	Plasmid_Carrier	11	0.264
270	pCF12_AZI	AZI	2	pCF12	Plasmid_Carrier	11	0.271
280	pCF12_AZI	AZI	2	pCF12	Plasmid_Carrier	11	0.277
290	pCF12_AZI	AZI	2	pCF12	Plasmid_Carrier	11	0.285
300	pCF12_AZI	AZI	2	pCF12	Plasmid_Carrier	11	0.292
310	pCF12_AZI	AZI	2	pCF12	Plasmid_Carrier	11	0.297
320	pCF12_AZI	AZI	2	pCF12	Plasmid_Carrier	11	0.304
330	pCF12_AZI	AZI	2	pCF12	Plasmid_Carrier	11	0.309
340	pCF12_AZI	AZI	2	pCF12	Plasmid_Carrier	11	0.314
350	pCF12_AZI	AZI	2	pCF12	Plasmid_Carrier	11	0.319
360	pCF12_AZI	AZI	2	pCF12	Plasmid_Carrier	11	0.323
370	pCF12_AZI	AZI	2	pCF12	Plasmid_Carrier	11	0.326
380	pCF12_AZI	AZI	2	pCF12	Plasmid_Carrier	11	0.329
390	pCF12_AZI	AZI	2	pCF12	Plasmid_Carrier	11	0.332
400	pCF12_AZI	AZI	2	pCF12	Plasmid_Carrier	11	0.336
410	pCF12_AZI	AZI	2	pCF12	Plasmid_Carrier	11	0.337
420	pCF12_AZI	AZI	2	pCF12	Plasmid_Carrier	11	0.339
430	pCF12_AZI	AZI	2	pCF12	Plasmid_Carrier	11	0.341
440	pCF12_AZI	AZI	2	pCF12	Plasmid_Carrier	11	0.343
450	pCF12_AZI	AZI	2	pCF12	Plasmid_Carrier	11	0.342
460	pCF12_AZI	AZI	2	pCF12	Plasmid_Carrier	11	0.344
470	pCF12_AZI	AZI	2	pCF12	Plasmid_Carrier	11	0.344
480	pCF12_AZI	AZI	2	pCF12	Plasmid_Carrier	11	0.344
490	pCF12_AZI	AZI	2	pCF12	Plasmid_Carrier	11	0.344
500	pCF12_AZI	AZI	2	pCF12	Plasmid_Carrier	11	0.342
510	pCF12_AZI	AZI	2	pCF12	Plasmid_Carrier	11	0.343
520	pCF12_AZI	AZI	2	pCF12	Plasmid_Carrier	11	0.341
530	pCF12_AZI	AZI	2	pCF12	Plasmid_Carrier	11	0.338
540	pCF12_AZI	AZI	2	pCF12	Plasmid_Carrier	11	0.335
550	pCF12_AZI	AZI	2	pCF12	Plasmid_Carrier	11	0.334
560	pCF12_AZI	AZI	2	pCF12	Plasmid_Carrier	11	0.33
570	pCF12_AZI	AZI	2	pCF12	Plasmid_Carrier	11	0.326
580	pCF12_AZI	AZI	2	pCF12	Plasmid_Carrier	11	0.322
590	pCF12_AZI	AZI	2	pCF12	Plasmid_Carrier	11	0.317
600	pCF12_AZI	AZI	2	pCF12	Plasmid_Carrier	11	0.313
610	pCF12_AZI	AZI	2	pCF12	Plasmid_Carrier	11	0.308
620	pCF12_AZI	AZI	2	pCF12	Plasmid_Carrier	11	0.305
630	pCF12_AZI	AZI	2	pCF12	Plasmid_Carrier	11	0.301
640	pCF12_AZI	AZI	2	pCF12	Plasmid_Carrier	11	0.296
650	pCF12_AZI	AZI	2	pCF12	Plasmid_Carrier	11	0.291
660	pCF12_AZI	AZI	2	pCF12	Plasmid_Carrier	11	0.289
670	pCF12_AZI	AZI	2	pCF12	Plasmid_Carrier	11	0.285
680	pCF12_AZI	AZI	2	pCF12	Plasmid_Carrier	11	0.282
690	pCF12_AZI	AZI	2	pCF12	Plasmid_Carrier	11	0.278
700	pCF12_AZI	AZI	2	pCF12	Plasmid_Carrier	11	0.275
710	pCF12_AZI	AZI	2	pCF12	Plasmid_Carrier	11	0.272
720	pCF12_AZI	AZI	2	pCF12	Plasmid_Carrier	11	0.27
730	pCF12_AZI	AZI	2	pCF12	Plasmid_Carrier	11	0.268
740	pCF12_AZI	AZI	2	pCF12	Plasmid_Carrier	11	0.266
750	pCF12_AZI	AZI	2	pCF12	Plasmid_Carrier	11	0.264
760	pCF12_AZI	AZI	2	pCF12	Plasmid_Carrier	11	0.262
770	pCF12_AZI	AZI	2	pCF12	Plasmid_Carrier	11	0.261
780	pCF12_AZI	AZI	2	pCF12	Plasmid_Carrier	11	0.259
790	pCF12_AZI	AZI	2	pCF12	Plasmid_Carrier	11	0.258
800	pCF12_AZI	AZI	2	pCF12	Plasmid_Carrier	11	0.257
810	pCF12_AZI	AZI	2	pCF12	Plasmid_Carrier	11	0.256
820	pCF12_AZI	AZI	2	pCF12	Plasmid_Carrier	11	0.256
830	pCF12_AZI	AZI	2	pCF12	Plasmid_Carrier	11	0.255
840	pCF12_AZI	AZI	2	pCF12	Plasmid_Carrier	11	0.254
850	pCF12_AZI	AZI	2	pCF12	Plasmid_Carrier	11	0.253
860	pCF12_AZI	AZI	2	pCF12	Plasmid_Carrier	11	0.252
870	pCF12_AZI	AZI	2	pCF12	Plasmid_Carrier	11	0.252
880	pCF12_AZI	AZI	2	pCF12	Plasmid_Carrier	11	0.251
890	pCF12_AZI	AZI	2	pCF12	Plasmid_Carrier	11	0.251
900	pCF12_AZI	AZI	2	pCF12	Plasmid_Carrier	11	0.251
910	pCF12_AZI	AZI	2	pCF12	Plasmid_Carrier	11	0.251
920	pCF12_AZI	AZI	2	pCF12	Plasmid_Carrier	11	0.25
930	pCF12_AZI	AZI	2	pCF12	Plasmid_Carrier	11	0.25
940	pCF12_AZI	AZI	2	pCF12	Plasmid_Carrier	11	0.25
950	pCF12_AZI	AZI	2	pCF12	Plasmid_Carrier	11	0.25
960	pCF12_AZI	AZI	2	pCF12	Plasmid_Carrier	11	0.25
970	pCF12_AZI	AZI	2	pCF12	Plasmid_Carrier	11	0.25
980	pCF12_AZI	AZI	2	pCF12	Plasmid_Carrier	11	0.25
990	pCF12_AZI	AZI	2	pCF12	Plasmid_Carrier	11	0.251
1000	pCF12_AZI	AZI	2	pCF12	Plasmid_Carrier	11	0.25
1010	pCF12_AZI	AZI	2	pCF12	Plasmid_Carrier	11	0.25
1020	pCF12_AZI	AZI	2	pCF12	Plasmid_Carrier	11	0.25
1030	pCF12_AZI	AZI	2	pCF12	Plasmid_Carrier	11	0.25
1040	pCF12_AZI	AZI	2	pCF12	Plasmid_Carrier	11	0.249
1050	pCF12_AZI	AZI	2	pCF12	Plasmid_Carrier	11	0.249
1060	pCF12_AZI	AZI	2	pCF12	Plasmid_Carrier	11	0.249
1070	pCF12_AZI	AZI	2	pCF12	Plasmid_Carrier	11	0.248
1080	pCF12_AZI	AZI	2	pCF12	Plasmid_Carrier	11	0.248
1090	pCF12_AZI	AZI	2	pCF12	Plasmid_Carrier	11	0.248
1100	pCF12_AZI	AZI	2	pCF12	Plasmid_Carrier	11	0.247
1110	pCF12_AZI	AZI	2	pCF12	Plasmid_Carrier	11	0.247
1120	pCF12_AZI	AZI	2	pCF12	Plasmid_Carrier	11	0.247
1130	pCF12_AZI	AZI	2	pCF12	Plasmid_Carrier	11	0.246
1140	pCF12_AZI	AZI	2	pCF12	Plasmid_Carrier	11	0.246
1150	pCF12_AZI	AZI	2	pCF12	Plasmid_Carrier	11	0.246
1160	pCF12_AZI	AZI	2	pCF12	Plasmid_Carrier	11	0.245
1170	pCF12_AZI	AZI	2	pCF12	Plasmid_Carrier	11	0.245
1180	pCF12_AZI	AZI	2	pCF12	Plasmid_Carrier	11	0.245
1190	pCF12_AZI	AZI	2	pCF12	Plasmid_Carrier	11	0.244
1200	pCF12_AZI	AZI	2	pCF12	Plasmid_Carrier	11	0.244
1210	pCF12_AZI	AZI	2	pCF12	Plasmid_Carrier	11	0.244
1220	pCF12_AZI	AZI	2	pCF12	Plasmid_Carrier	11	0.244
1230	pCF12_AZI	AZI	2	pCF12	Plasmid_Carrier	11	0.243
1240	pCF12_AZI	AZI	2	pCF12	Plasmid_Carrier	11	0.243
1250	pCF12_AZI	AZI	2	pCF12	Plasmid_Carrier	11	0.243
1260	pCF12_AZI	AZI	2	pCF12	Plasmid_Carrier	11	0.243
1270	pCF12_AZI	AZI	2	pCF12	Plasmid_Carrier	11	0.242
1280	pCF12_AZI	AZI	2	pCF12	Plasmid_Carrier	11	0.243
1290	pCF12_AZI	AZI	2	pCF12	Plasmid_Carrier	11	0.243
1300	pCF12_AZI	AZI	2	pCF12	Plasmid_Carrier	11	0.242
1310	pCF12_AZI	AZI	2	pCF12	Plasmid_Carrier	11	0.242
1320	pCF12_AZI	AZI	2	pCF12	Plasmid_Carrier	11	0.242
1330	pCF12_AZI	AZI	2	pCF12	Plasmid_Carrier	11	0.242
1340	pCF12_AZI	AZI	2	pCF12	Plasmid_Carrier	11	0.242
1350	pCF12_AZI	AZI	2	pCF12	Plasmid_Carrier	11	0.242
1360	pCF12_AZI	AZI	2	pCF12	Plasmid_Carrier	11	0.242
1370	pCF12_AZI	AZI	2	pCF12	Plasmid_Carrier	11	0.241
1380	pCF12_AZI	AZI	2	pCF12	Plasmid_Carrier	11	0.241
1390	pCF12_AZI	AZI	2	pCF12	Plasmid_Carrier	11	0.241
1400	pCF12_AZI	AZI	2	pCF12	Plasmid_Carrier	11	0.241
1410	pCF12_AZI	AZI	2	pCF12	Plasmid_Carrier	11	0.241
1420	pCF12_AZI	AZI	2	pCF12	Plasmid_Carrier	11	0.241
1430	pCF12_AZI	AZI	2	pCF12	Plasmid_Carrier	11	0.241
1440	pCF12_AZI	AZI	2	pCF12	Plasmid_Carrier	11	0.241
0	pCF12_AZI	AZI	2	pCF12	Plasmid_Carrier	12	0.098
10	pCF12_AZI	AZI	2	pCF12	Plasmid_Carrier	12	0.094
20	pCF12_AZI	AZI	2	pCF12	Plasmid_Carrier	12	0.094
30	pCF12_AZI	AZI	2	pCF12	Plasmid_Carrier	12	0.094
40	pCF12_AZI	AZI	2	pCF12	Plasmid_Carrier	12	0.095
50	pCF12_AZI	AZI	2	pCF12	Plasmid_Carrier	12	0.096
60	pCF12_AZI	AZI	2	pCF12	Plasmid_Carrier	12	0.097
70	pCF12_AZI	AZI	2	pCF12	Plasmid_Carrier	12	0.098
80	pCF12_AZI	AZI	2	pCF12	Plasmid_Carrier	12	0.101
90	pCF12_AZI	AZI	2	pCF12	Plasmid_Carrier	12	0.104
100	pCF12_AZI	AZI	2	pCF12	Plasmid_Carrier	12	0.109
110	pCF12_AZI	AZI	2	pCF12	Plasmid_Carrier	12	0.115
120	pCF12_AZI	AZI	2	pCF12	Plasmid_Carrier	12	0.124
130	pCF12_AZI	AZI	2	pCF12	Plasmid_Carrier	12	0.134
140	pCF12_AZI	AZI	2	pCF12	Plasmid_Carrier	12	0.145
150	pCF12_AZI	AZI	2	pCF12	Plasmid_Carrier	12	0.156
160	pCF12_AZI	AZI	2	pCF12	Plasmid_Carrier	12	0.165
170	pCF12_AZI	AZI	2	pCF12	Plasmid_Carrier	12	0.173
180	pCF12_AZI	AZI	2	pCF12	Plasmid_Carrier	12	0.182
190	pCF12_AZI	AZI	2	pCF12	Plasmid_Carrier	12	0.192
200	pCF12_AZI	AZI	2	pCF12	Plasmid_Carrier	12	0.203
210	pCF12_AZI	AZI	2	pCF12	Plasmid_Carrier	12	0.214
220	pCF12_AZI	AZI	2	pCF12	Plasmid_Carrier	12	0.223
230	pCF12_AZI	AZI	2	pCF12	Plasmid_Carrier	12	0.234
240	pCF12_AZI	AZI	2	pCF12	Plasmid_Carrier	12	0.244
250	pCF12_AZI	AZI	2	pCF12	Plasmid_Carrier	12	0.252
260	pCF12_AZI	AZI	2	pCF12	Plasmid_Carrier	12	0.26
270	pCF12_AZI	AZI	2	pCF12	Plasmid_Carrier	12	0.267
280	pCF12_AZI	AZI	2	pCF12	Plasmid_Carrier	12	0.274
290	pCF12_AZI	AZI	2	pCF12	Plasmid_Carrier	12	0.281
300	pCF12_AZI	AZI	2	pCF12	Plasmid_Carrier	12	0.287
310	pCF12_AZI	AZI	2	pCF12	Plasmid_Carrier	12	0.295
320	pCF12_AZI	AZI	2	pCF12	Plasmid_Carrier	12	0.301
330	pCF12_AZI	AZI	2	pCF12	Plasmid_Carrier	12	0.307
340	pCF12_AZI	AZI	2	pCF12	Plasmid_Carrier	12	0.313
350	pCF12_AZI	AZI	2	pCF12	Plasmid_Carrier	12	0.319
360	pCF12_AZI	AZI	2	pCF12	Plasmid_Carrier	12	0.324
370	pCF12_AZI	AZI	2	pCF12	Plasmid_Carrier	12	0.328
380	pCF12_AZI	AZI	2	pCF12	Plasmid_Carrier	12	0.332
390	pCF12_AZI	AZI	2	pCF12	Plasmid_Carrier	12	0.337
400	pCF12_AZI	AZI	2	pCF12	Plasmid_Carrier	12	0.34
410	pCF12_AZI	AZI	2	pCF12	Plasmid_Carrier	12	0.343
420	pCF12_AZI	AZI	2	pCF12	Plasmid_Carrier	12	0.345
430	pCF12_AZI	AZI	2	pCF12	Plasmid_Carrier	12	0.349
440	pCF12_AZI	AZI	2	pCF12	Plasmid_Carrier	12	0.351
450	pCF12_AZI	AZI	2	pCF12	Plasmid_Carrier	12	0.354
460	pCF12_AZI	AZI	2	pCF12	Plasmid_Carrier	12	0.359
470	pCF12_AZI	AZI	2	pCF12	Plasmid_Carrier	12	0.361
480	pCF12_AZI	AZI	2	pCF12	Plasmid_Carrier	12	0.363
490	pCF12_AZI	AZI	2	pCF12	Plasmid_Carrier	12	0.366
500	pCF12_AZI	AZI	2	pCF12	Plasmid_Carrier	12	0.368
510	pCF12_AZI	AZI	2	pCF12	Plasmid_Carrier	12	0.372
520	pCF12_AZI	AZI	2	pCF12	Plasmid_Carrier	12	0.373
530	pCF12_AZI	AZI	2	pCF12	Plasmid_Carrier	12	0.377
540	pCF12_AZI	AZI	2	pCF12	Plasmid_Carrier	12	0.378
550	pCF12_AZI	AZI	2	pCF12	Plasmid_Carrier	12	0.38
560	pCF12_AZI	AZI	2	pCF12	Plasmid_Carrier	12	0.381
570	pCF12_AZI	AZI	2	pCF12	Plasmid_Carrier	12	0.383
580	pCF12_AZI	AZI	2	pCF12	Plasmid_Carrier	12	0.384
590	pCF12_AZI	AZI	2	pCF12	Plasmid_Carrier	12	0.386
600	pCF12_AZI	AZI	2	pCF12	Plasmid_Carrier	12	0.386
610	pCF12_AZI	AZI	2	pCF12	Plasmid_Carrier	12	0.387
620	pCF12_AZI	AZI	2	pCF12	Plasmid_Carrier	12	0.386
630	pCF12_AZI	AZI	2	pCF12	Plasmid_Carrier	12	0.387
640	pCF12_AZI	AZI	2	pCF12	Plasmid_Carrier	12	0.388
650	pCF12_AZI	AZI	2	pCF12	Plasmid_Carrier	12	0.388
660	pCF12_AZI	AZI	2	pCF12	Plasmid_Carrier	12	0.387
670	pCF12_AZI	AZI	2	pCF12	Plasmid_Carrier	12	0.387
680	pCF12_AZI	AZI	2	pCF12	Plasmid_Carrier	12	0.388
690	pCF12_AZI	AZI	2	pCF12	Plasmid_Carrier	12	0.387
700	pCF12_AZI	AZI	2	pCF12	Plasmid_Carrier	12	0.387
710	pCF12_AZI	AZI	2	pCF12	Plasmid_Carrier	12	0.387
720	pCF12_AZI	AZI	2	pCF12	Plasmid_Carrier	12	0.387
730	pCF12_AZI	AZI	2	pCF12	Plasmid_Carrier	12	0.386
740	pCF12_AZI	AZI	2	pCF12	Plasmid_Carrier	12	0.385
750	pCF12_AZI	AZI	2	pCF12	Plasmid_Carrier	12	0.387
760	pCF12_AZI	AZI	2	pCF12	Plasmid_Carrier	12	0.387
770	pCF12_AZI	AZI	2	pCF12	Plasmid_Carrier	12	0.386
780	pCF12_AZI	AZI	2	pCF12	Plasmid_Carrier	12	0.386
790	pCF12_AZI	AZI	2	pCF12	Plasmid_Carrier	12	0.385
800	pCF12_AZI	AZI	2	pCF12	Plasmid_Carrier	12	0.385
810	pCF12_AZI	AZI	2	pCF12	Plasmid_Carrier	12	0.385
820	pCF12_AZI	AZI	2	pCF12	Plasmid_Carrier	12	0.386
830	pCF12_AZI	AZI	2	pCF12	Plasmid_Carrier	12	0.385
840	pCF12_AZI	AZI	2	pCF12	Plasmid_Carrier	12	0.385
850	pCF12_AZI	AZI	2	pCF12	Plasmid_Carrier	12	0.384
860	pCF12_AZI	AZI	2	pCF12	Plasmid_Carrier	12	0.384
870	pCF12_AZI	AZI	2	pCF12	Plasmid_Carrier	12	0.383
880	pCF12_AZI	AZI	2	pCF12	Plasmid_Carrier	12	0.383
890	pCF12_AZI	AZI	2	pCF12	Plasmid_Carrier	12	0.382
900	pCF12_AZI	AZI	2	pCF12	Plasmid_Carrier	12	0.381
910	pCF12_AZI	AZI	2	pCF12	Plasmid_Carrier	12	0.38
920	pCF12_AZI	AZI	2	pCF12	Plasmid_Carrier	12	0.379
930	pCF12_AZI	AZI	2	pCF12	Plasmid_Carrier	12	0.378
940	pCF12_AZI	AZI	2	pCF12	Plasmid_Carrier	12	0.377
950	pCF12_AZI	AZI	2	pCF12	Plasmid_Carrier	12	0.375
960	pCF12_AZI	AZI	2	pCF12	Plasmid_Carrier	12	0.373
970	pCF12_AZI	AZI	2	pCF12	Plasmid_Carrier	12	0.373
980	pCF12_AZI	AZI	2	pCF12	Plasmid_Carrier	12	0.371
990	pCF12_AZI	AZI	2	pCF12	Plasmid_Carrier	12	0.37
1000	pCF12_AZI	AZI	2	pCF12	Plasmid_Carrier	12	0.368
1010	pCF12_AZI	AZI	2	pCF12	Plasmid_Carrier	12	0.367
1020	pCF12_AZI	AZI	2	pCF12	Plasmid_Carrier	12	0.366
1030	pCF12_AZI	AZI	2	pCF12	Plasmid_Carrier	12	0.364
1040	pCF12_AZI	AZI	2	pCF12	Plasmid_Carrier	12	0.363
1050	pCF12_AZI	AZI	2	pCF12	Plasmid_Carrier	12	0.361
1060	pCF12_AZI	AZI	2	pCF12	Plasmid_Carrier	12	0.359
1070	pCF12_AZI	AZI	2	pCF12	Plasmid_Carrier	12	0.358
1080	pCF12_AZI	AZI	2	pCF12	Plasmid_Carrier	12	0.357
1090	pCF12_AZI	AZI	2	pCF12	Plasmid_Carrier	12	0.355
1100	pCF12_AZI	AZI	2	pCF12	Plasmid_Carrier	12	0.353
1110	pCF12_AZI	AZI	2	pCF12	Plasmid_Carrier	12	0.352
1120	pCF12_AZI	AZI	2	pCF12	Plasmid_Carrier	12	0.351
1130	pCF12_AZI	AZI	2	pCF12	Plasmid_Carrier	12	0.349
1140	pCF12_AZI	AZI	2	pCF12	Plasmid_Carrier	12	0.347
1150	pCF12_AZI	AZI	2	pCF12	Plasmid_Carrier	12	0.346
1160	pCF12_AZI	AZI	2	pCF12	Plasmid_Carrier	12	0.344
1170	pCF12_AZI	AZI	2	pCF12	Plasmid_Carrier	12	0.343
1180	pCF12_AZI	AZI	2	pCF12	Plasmid_Carrier	12	0.342
1190	pCF12_AZI	AZI	2	pCF12	Plasmid_Carrier	12	0.341
1200	pCF12_AZI	AZI	2	pCF12	Plasmid_Carrier	12	0.339
1210	pCF12_AZI	AZI	2	pCF12	Plasmid_Carrier	12	0.338
1220	pCF12_AZI	AZI	2	pCF12	Plasmid_Carrier	12	0.336
1230	pCF12_AZI	AZI	2	pCF12	Plasmid_Carrier	12	0.335
1240	pCF12_AZI	AZI	2	pCF12	Plasmid_Carrier	12	0.334
1250	pCF12_AZI	AZI	2	pCF12	Plasmid_Carrier	12	0.332
1260	pCF12_AZI	AZI	2	pCF12	Plasmid_Carrier	12	0.331
1270	pCF12_AZI	AZI	2	pCF12	Plasmid_Carrier	12	0.33
1280	pCF12_AZI	AZI	2	pCF12	Plasmid_Carrier	12	0.328
1290	pCF12_AZI	AZI	2	pCF12	Plasmid_Carrier	12	0.327
1300	pCF12_AZI	AZI	2	pCF12	Plasmid_Carrier	12	0.325
1310	pCF12_AZI	AZI	2	pCF12	Plasmid_Carrier	12	0.324
1320	pCF12_AZI	AZI	2	pCF12	Plasmid_Carrier	12	0.323
1330	pCF12_AZI	AZI	2	pCF12	Plasmid_Carrier	12	0.322
1340	pCF12_AZI	AZI	2	pCF12	Plasmid_Carrier	12	0.32
1350	pCF12_AZI	AZI	2	pCF12	Plasmid_Carrier	12	0.318
1360	pCF12_AZI	AZI	2	pCF12	Plasmid_Carrier	12	0.317
1370	pCF12_AZI	AZI	2	pCF12	Plasmid_Carrier	12	0.316
1380	pCF12_AZI	AZI	2	pCF12	Plasmid_Carrier	12	0.315
1390	pCF12_AZI	AZI	2	pCF12	Plasmid_Carrier	12	0.313
1400	pCF12_AZI	AZI	2	pCF12	Plasmid_Carrier	12	0.312
1410	pCF12_AZI	AZI	2	pCF12	Plasmid_Carrier	12	0.311
1420	pCF12_AZI	AZI	2	pCF12	Plasmid_Carrier	12	0.31
1430	pCF12_AZI	AZI	2	pCF12	Plasmid_Carrier	12	0.308
1440	pCF12_AZI	AZI	2	pCF12	Plasmid_Carrier	12	0.307
0	pCF12_AZI	AZI	4	pCF12	Plasmid_Carrier	7	0.113
10	pCF12_AZI	AZI	4	pCF12	Plasmid_Carrier	7	0.095
20	pCF12_AZI	AZI	4	pCF12	Plasmid_Carrier	7	0.095
30	pCF12_AZI	AZI	4	pCF12	Plasmid_Carrier	7	0.095
40	pCF12_AZI	AZI	4	pCF12	Plasmid_Carrier	7	0.096
50	pCF12_AZI	AZI	4	pCF12	Plasmid_Carrier	7	0.096
60	pCF12_AZI	AZI	4	pCF12	Plasmid_Carrier	7	0.098
70	pCF12_AZI	AZI	4	pCF12	Plasmid_Carrier	7	0.1
80	pCF12_AZI	AZI	4	pCF12	Plasmid_Carrier	7	0.101
90	pCF12_AZI	AZI	4	pCF12	Plasmid_Carrier	7	0.105
100	pCF12_AZI	AZI	4	pCF12	Plasmid_Carrier	7	0.11
110	pCF12_AZI	AZI	4	pCF12	Plasmid_Carrier	7	0.115
120	pCF12_AZI	AZI	4	pCF12	Plasmid_Carrier	7	0.123
130	pCF12_AZI	AZI	4	pCF12	Plasmid_Carrier	7	0.13
140	pCF12_AZI	AZI	4	pCF12	Plasmid_Carrier	7	0.141
150	pCF12_AZI	AZI	4	pCF12	Plasmid_Carrier	7	0.148
160	pCF12_AZI	AZI	4	pCF12	Plasmid_Carrier	7	0.157
170	pCF12_AZI	AZI	4	pCF12	Plasmid_Carrier	7	0.164
180	pCF12_AZI	AZI	4	pCF12	Plasmid_Carrier	7	0.171
190	pCF12_AZI	AZI	4	pCF12	Plasmid_Carrier	7	0.176
200	pCF12_AZI	AZI	4	pCF12	Plasmid_Carrier	7	0.181
210	pCF12_AZI	AZI	4	pCF12	Plasmid_Carrier	7	0.186
220	pCF12_AZI	AZI	4	pCF12	Plasmid_Carrier	7	0.192
230	pCF12_AZI	AZI	4	pCF12	Plasmid_Carrier	7	0.195
240	pCF12_AZI	AZI	4	pCF12	Plasmid_Carrier	7	0.199
250	pCF12_AZI	AZI	4	pCF12	Plasmid_Carrier	7	0.202
260	pCF12_AZI	AZI	4	pCF12	Plasmid_Carrier	7	0.206
270	pCF12_AZI	AZI	4	pCF12	Plasmid_Carrier	7	0.207
280	pCF12_AZI	AZI	4	pCF12	Plasmid_Carrier	7	0.209
290	pCF12_AZI	AZI	4	pCF12	Plasmid_Carrier	7	0.21
300	pCF12_AZI	AZI	4	pCF12	Plasmid_Carrier	7	0.21
310	pCF12_AZI	AZI	4	pCF12	Plasmid_Carrier	7	0.21
320	pCF12_AZI	AZI	4	pCF12	Plasmid_Carrier	7	0.209
330	pCF12_AZI	AZI	4	pCF12	Plasmid_Carrier	7	0.208
340	pCF12_AZI	AZI	4	pCF12	Plasmid_Carrier	7	0.206
350	pCF12_AZI	AZI	4	pCF12	Plasmid_Carrier	7	0.205
360	pCF12_AZI	AZI	4	pCF12	Plasmid_Carrier	7	0.202
370	pCF12_AZI	AZI	4	pCF12	Plasmid_Carrier	7	0.199
380	pCF12_AZI	AZI	4	pCF12	Plasmid_Carrier	7	0.197
390	pCF12_AZI	AZI	4	pCF12	Plasmid_Carrier	7	0.193
400	pCF12_AZI	AZI	4	pCF12	Plasmid_Carrier	7	0.188
410	pCF12_AZI	AZI	4	pCF12	Plasmid_Carrier	7	0.184
420	pCF12_AZI	AZI	4	pCF12	Plasmid_Carrier	7	0.182
430	pCF12_AZI	AZI	4	pCF12	Plasmid_Carrier	7	0.178
440	pCF12_AZI	AZI	4	pCF12	Plasmid_Carrier	7	0.173
450	pCF12_AZI	AZI	4	pCF12	Plasmid_Carrier	7	0.17
460	pCF12_AZI	AZI	4	pCF12	Plasmid_Carrier	7	0.166
470	pCF12_AZI	AZI	4	pCF12	Plasmid_Carrier	7	0.162
480	pCF12_AZI	AZI	4	pCF12	Plasmid_Carrier	7	0.158
490	pCF12_AZI	AZI	4	pCF12	Plasmid_Carrier	7	0.155
500	pCF12_AZI	AZI	4	pCF12	Plasmid_Carrier	7	0.153
510	pCF12_AZI	AZI	4	pCF12	Plasmid_Carrier	7	0.15
520	pCF12_AZI	AZI	4	pCF12	Plasmid_Carrier	7	0.149
530	pCF12_AZI	AZI	4	pCF12	Plasmid_Carrier	7	0.147
540	pCF12_AZI	AZI	4	pCF12	Plasmid_Carrier	7	0.146
550	pCF12_AZI	AZI	4	pCF12	Plasmid_Carrier	7	0.145
560	pCF12_AZI	AZI	4	pCF12	Plasmid_Carrier	7	0.145
570	pCF12_AZI	AZI	4	pCF12	Plasmid_Carrier	7	0.144
580	pCF12_AZI	AZI	4	pCF12	Plasmid_Carrier	7	0.144
590	pCF12_AZI	AZI	4	pCF12	Plasmid_Carrier	7	0.143
600	pCF12_AZI	AZI	4	pCF12	Plasmid_Carrier	7	0.143
610	pCF12_AZI	AZI	4	pCF12	Plasmid_Carrier	7	0.143
620	pCF12_AZI	AZI	4	pCF12	Plasmid_Carrier	7	0.143
630	pCF12_AZI	AZI	4	pCF12	Plasmid_Carrier	7	0.143
640	pCF12_AZI	AZI	4	pCF12	Plasmid_Carrier	7	0.143
650	pCF12_AZI	AZI	4	pCF12	Plasmid_Carrier	7	0.144
660	pCF12_AZI	AZI	4	pCF12	Plasmid_Carrier	7	0.144
670	pCF12_AZI	AZI	4	pCF12	Plasmid_Carrier	7	0.144
680	pCF12_AZI	AZI	4	pCF12	Plasmid_Carrier	7	0.144
690	pCF12_AZI	AZI	4	pCF12	Plasmid_Carrier	7	0.144
700	pCF12_AZI	AZI	4	pCF12	Plasmid_Carrier	7	0.144
710	pCF12_AZI	AZI	4	pCF12	Plasmid_Carrier	7	0.144
720	pCF12_AZI	AZI	4	pCF12	Plasmid_Carrier	7	0.144
730	pCF12_AZI	AZI	4	pCF12	Plasmid_Carrier	7	0.144
740	pCF12_AZI	AZI	4	pCF12	Plasmid_Carrier	7	0.144
750	pCF12_AZI	AZI	4	pCF12	Plasmid_Carrier	7	0.144
760	pCF12_AZI	AZI	4	pCF12	Plasmid_Carrier	7	0.144
770	pCF12_AZI	AZI	4	pCF12	Plasmid_Carrier	7	0.143
780	pCF12_AZI	AZI	4	pCF12	Plasmid_Carrier	7	0.143
790	pCF12_AZI	AZI	4	pCF12	Plasmid_Carrier	7	0.143
800	pCF12_AZI	AZI	4	pCF12	Plasmid_Carrier	7	0.143
810	pCF12_AZI	AZI	4	pCF12	Plasmid_Carrier	7	0.143
820	pCF12_AZI	AZI	4	pCF12	Plasmid_Carrier	7	0.144
830	pCF12_AZI	AZI	4	pCF12	Plasmid_Carrier	7	0.144
840	pCF12_AZI	AZI	4	pCF12	Plasmid_Carrier	7	0.144
850	pCF12_AZI	AZI	4	pCF12	Plasmid_Carrier	7	0.144
860	pCF12_AZI	AZI	4	pCF12	Plasmid_Carrier	7	0.143
870	pCF12_AZI	AZI	4	pCF12	Plasmid_Carrier	7	0.144
880	pCF12_AZI	AZI	4	pCF12	Plasmid_Carrier	7	0.144
890	pCF12_AZI	AZI	4	pCF12	Plasmid_Carrier	7	0.144
900	pCF12_AZI	AZI	4	pCF12	Plasmid_Carrier	7	0.144
910	pCF12_AZI	AZI	4	pCF12	Plasmid_Carrier	7	0.144
920	pCF12_AZI	AZI	4	pCF12	Plasmid_Carrier	7	0.144
930	pCF12_AZI	AZI	4	pCF12	Plasmid_Carrier	7	0.144
940	pCF12_AZI	AZI	4	pCF12	Plasmid_Carrier	7	0.144
950	pCF12_AZI	AZI	4	pCF12	Plasmid_Carrier	7	0.144
960	pCF12_AZI	AZI	4	pCF12	Plasmid_Carrier	7	0.144
970	pCF12_AZI	AZI	4	pCF12	Plasmid_Carrier	7	0.143
980	pCF12_AZI	AZI	4	pCF12	Plasmid_Carrier	7	0.144
990	pCF12_AZI	AZI	4	pCF12	Plasmid_Carrier	7	0.143
1000	pCF12_AZI	AZI	4	pCF12	Plasmid_Carrier	7	0.143
1010	pCF12_AZI	AZI	4	pCF12	Plasmid_Carrier	7	0.143
1020	pCF12_AZI	AZI	4	pCF12	Plasmid_Carrier	7	0.143
1030	pCF12_AZI	AZI	4	pCF12	Plasmid_Carrier	7	0.144
1040	pCF12_AZI	AZI	4	pCF12	Plasmid_Carrier	7	0.144
1050	pCF12_AZI	AZI	4	pCF12	Plasmid_Carrier	7	0.143
1060	pCF12_AZI	AZI	4	pCF12	Plasmid_Carrier	7	0.143
1070	pCF12_AZI	AZI	4	pCF12	Plasmid_Carrier	7	0.143
1080	pCF12_AZI	AZI	4	pCF12	Plasmid_Carrier	7	0.144
1090	pCF12_AZI	AZI	4	pCF12	Plasmid_Carrier	7	0.144
1100	pCF12_AZI	AZI	4	pCF12	Plasmid_Carrier	7	0.143
1110	pCF12_AZI	AZI	4	pCF12	Plasmid_Carrier	7	0.143
1120	pCF12_AZI	AZI	4	pCF12	Plasmid_Carrier	7	0.143
1130	pCF12_AZI	AZI	4	pCF12	Plasmid_Carrier	7	0.143
1140	pCF12_AZI	AZI	4	pCF12	Plasmid_Carrier	7	0.143
1150	pCF12_AZI	AZI	4	pCF12	Plasmid_Carrier	7	0.144
1160	pCF12_AZI	AZI	4	pCF12	Plasmid_Carrier	7	0.144
1170	pCF12_AZI	AZI	4	pCF12	Plasmid_Carrier	7	0.143
1180	pCF12_AZI	AZI	4	pCF12	Plasmid_Carrier	7	0.143
1190	pCF12_AZI	AZI	4	pCF12	Plasmid_Carrier	7	0.143
1200	pCF12_AZI	AZI	4	pCF12	Plasmid_Carrier	7	0.144
1210	pCF12_AZI	AZI	4	pCF12	Plasmid_Carrier	7	0.143
1220	pCF12_AZI	AZI	4	pCF12	Plasmid_Carrier	7	0.144
1230	pCF12_AZI	AZI	4	pCF12	Plasmid_Carrier	7	0.143
1240	pCF12_AZI	AZI	4	pCF12	Plasmid_Carrier	7	0.143
1250	pCF12_AZI	AZI	4	pCF12	Plasmid_Carrier	7	0.144
1260	pCF12_AZI	AZI	4	pCF12	Plasmid_Carrier	7	0.143
1270	pCF12_AZI	AZI	4	pCF12	Plasmid_Carrier	7	0.144
1280	pCF12_AZI	AZI	4	pCF12	Plasmid_Carrier	7	0.144
1290	pCF12_AZI	AZI	4	pCF12	Plasmid_Carrier	7	0.143
1300	pCF12_AZI	AZI	4	pCF12	Plasmid_Carrier	7	0.143
1310	pCF12_AZI	AZI	4	pCF12	Plasmid_Carrier	7	0.144
1320	pCF12_AZI	AZI	4	pCF12	Plasmid_Carrier	7	0.143
1330	pCF12_AZI	AZI	4	pCF12	Plasmid_Carrier	7	0.144
1340	pCF12_AZI	AZI	4	pCF12	Plasmid_Carrier	7	0.143
1350	pCF12_AZI	AZI	4	pCF12	Plasmid_Carrier	7	0.143
1360	pCF12_AZI	AZI	4	pCF12	Plasmid_Carrier	7	0.143
1370	pCF12_AZI	AZI	4	pCF12	Plasmid_Carrier	7	0.143
1380	pCF12_AZI	AZI	4	pCF12	Plasmid_Carrier	7	0.144
1390	pCF12_AZI	AZI	4	pCF12	Plasmid_Carrier	7	0.143
1400	pCF12_AZI	AZI	4	pCF12	Plasmid_Carrier	7	0.144
1410	pCF12_AZI	AZI	4	pCF12	Plasmid_Carrier	7	0.143
1420	pCF12_AZI	AZI	4	pCF12	Plasmid_Carrier	7	0.143
1430	pCF12_AZI	AZI	4	pCF12	Plasmid_Carrier	7	0.143
1440	pCF12_AZI	AZI	4	pCF12	Plasmid_Carrier	7	0.143
0	pCF12_AZI	AZI	4	pCF12	Plasmid_Carrier	8	0.117
10	pCF12_AZI	AZI	4	pCF12	Plasmid_Carrier	8	0.096
20	pCF12_AZI	AZI	4	pCF12	Plasmid_Carrier	8	0.095
30	pCF12_AZI	AZI	4	pCF12	Plasmid_Carrier	8	0.096
40	pCF12_AZI	AZI	4	pCF12	Plasmid_Carrier	8	0.096
50	pCF12_AZI	AZI	4	pCF12	Plasmid_Carrier	8	0.098
60	pCF12_AZI	AZI	4	pCF12	Plasmid_Carrier	8	0.099
70	pCF12_AZI	AZI	4	pCF12	Plasmid_Carrier	8	0.101
80	pCF12_AZI	AZI	4	pCF12	Plasmid_Carrier	8	0.104
90	pCF12_AZI	AZI	4	pCF12	Plasmid_Carrier	8	0.108
100	pCF12_AZI	AZI	4	pCF12	Plasmid_Carrier	8	0.114
110	pCF12_AZI	AZI	4	pCF12	Plasmid_Carrier	8	0.121
120	pCF12_AZI	AZI	4	pCF12	Plasmid_Carrier	8	0.127
130	pCF12_AZI	AZI	4	pCF12	Plasmid_Carrier	8	0.137
140	pCF12_AZI	AZI	4	pCF12	Plasmid_Carrier	8	0.146
150	pCF12_AZI	AZI	4	pCF12	Plasmid_Carrier	8	0.154
160	pCF12_AZI	AZI	4	pCF12	Plasmid_Carrier	8	0.162
170	pCF12_AZI	AZI	4	pCF12	Plasmid_Carrier	8	0.169
180	pCF12_AZI	AZI	4	pCF12	Plasmid_Carrier	8	0.173
190	pCF12_AZI	AZI	4	pCF12	Plasmid_Carrier	8	0.18
200	pCF12_AZI	AZI	4	pCF12	Plasmid_Carrier	8	0.185
210	pCF12_AZI	AZI	4	pCF12	Plasmid_Carrier	8	0.191
220	pCF12_AZI	AZI	4	pCF12	Plasmid_Carrier	8	0.197
230	pCF12_AZI	AZI	4	pCF12	Plasmid_Carrier	8	0.203
240	pCF12_AZI	AZI	4	pCF12	Plasmid_Carrier	8	0.208
250	pCF12_AZI	AZI	4	pCF12	Plasmid_Carrier	8	0.213
260	pCF12_AZI	AZI	4	pCF12	Plasmid_Carrier	8	0.217
270	pCF12_AZI	AZI	4	pCF12	Plasmid_Carrier	8	0.221
280	pCF12_AZI	AZI	4	pCF12	Plasmid_Carrier	8	0.226
290	pCF12_AZI	AZI	4	pCF12	Plasmid_Carrier	8	0.231
300	pCF12_AZI	AZI	4	pCF12	Plasmid_Carrier	8	0.234
310	pCF12_AZI	AZI	4	pCF12	Plasmid_Carrier	8	0.236
320	pCF12_AZI	AZI	4	pCF12	Plasmid_Carrier	8	0.238
330	pCF12_AZI	AZI	4	pCF12	Plasmid_Carrier	8	0.241
340	pCF12_AZI	AZI	4	pCF12	Plasmid_Carrier	8	0.243
350	pCF12_AZI	AZI	4	pCF12	Plasmid_Carrier	8	0.245
360	pCF12_AZI	AZI	4	pCF12	Plasmid_Carrier	8	0.247
370	pCF12_AZI	AZI	4	pCF12	Plasmid_Carrier	8	0.249
380	pCF12_AZI	AZI	4	pCF12	Plasmid_Carrier	8	0.25
390	pCF12_AZI	AZI	4	pCF12	Plasmid_Carrier	8	0.251
400	pCF12_AZI	AZI	4	pCF12	Plasmid_Carrier	8	0.253
410	pCF12_AZI	AZI	4	pCF12	Plasmid_Carrier	8	0.254
420	pCF12_AZI	AZI	4	pCF12	Plasmid_Carrier	8	0.256
430	pCF12_AZI	AZI	4	pCF12	Plasmid_Carrier	8	0.257
440	pCF12_AZI	AZI	4	pCF12	Plasmid_Carrier	8	0.258
450	pCF12_AZI	AZI	4	pCF12	Plasmid_Carrier	8	0.258
460	pCF12_AZI	AZI	4	pCF12	Plasmid_Carrier	8	0.26
470	pCF12_AZI	AZI	4	pCF12	Plasmid_Carrier	8	0.26
480	pCF12_AZI	AZI	4	pCF12	Plasmid_Carrier	8	0.261
490	pCF12_AZI	AZI	4	pCF12	Plasmid_Carrier	8	0.261
500	pCF12_AZI	AZI	4	pCF12	Plasmid_Carrier	8	0.261
510	pCF12_AZI	AZI	4	pCF12	Plasmid_Carrier	8	0.263
520	pCF12_AZI	AZI	4	pCF12	Plasmid_Carrier	8	0.264
530	pCF12_AZI	AZI	4	pCF12	Plasmid_Carrier	8	0.266
540	pCF12_AZI	AZI	4	pCF12	Plasmid_Carrier	8	0.266
550	pCF12_AZI	AZI	4	pCF12	Plasmid_Carrier	8	0.264
560	pCF12_AZI	AZI	4	pCF12	Plasmid_Carrier	8	0.265
570	pCF12_AZI	AZI	4	pCF12	Plasmid_Carrier	8	0.263
580	pCF12_AZI	AZI	4	pCF12	Plasmid_Carrier	8	0.264
590	pCF12_AZI	AZI	4	pCF12	Plasmid_Carrier	8	0.263
600	pCF12_AZI	AZI	4	pCF12	Plasmid_Carrier	8	0.263
610	pCF12_AZI	AZI	4	pCF12	Plasmid_Carrier	8	0.262
620	pCF12_AZI	AZI	4	pCF12	Plasmid_Carrier	8	0.263
630	pCF12_AZI	AZI	4	pCF12	Plasmid_Carrier	8	0.262
640	pCF12_AZI	AZI	4	pCF12	Plasmid_Carrier	8	0.261
650	pCF12_AZI	AZI	4	pCF12	Plasmid_Carrier	8	0.259
660	pCF12_AZI	AZI	4	pCF12	Plasmid_Carrier	8	0.258
670	pCF12_AZI	AZI	4	pCF12	Plasmid_Carrier	8	0.257
680	pCF12_AZI	AZI	4	pCF12	Plasmid_Carrier	8	0.256
690	pCF12_AZI	AZI	4	pCF12	Plasmid_Carrier	8	0.255
700	pCF12_AZI	AZI	4	pCF12	Plasmid_Carrier	8	0.254
710	pCF12_AZI	AZI	4	pCF12	Plasmid_Carrier	8	0.252
720	pCF12_AZI	AZI	4	pCF12	Plasmid_Carrier	8	0.251
730	pCF12_AZI	AZI	4	pCF12	Plasmid_Carrier	8	0.25
740	pCF12_AZI	AZI	4	pCF12	Plasmid_Carrier	8	0.249
750	pCF12_AZI	AZI	4	pCF12	Plasmid_Carrier	8	0.249
760	pCF12_AZI	AZI	4	pCF12	Plasmid_Carrier	8	0.248
770	pCF12_AZI	AZI	4	pCF12	Plasmid_Carrier	8	0.247
780	pCF12_AZI	AZI	4	pCF12	Plasmid_Carrier	8	0.246
790	pCF12_AZI	AZI	4	pCF12	Plasmid_Carrier	8	0.245
800	pCF12_AZI	AZI	4	pCF12	Plasmid_Carrier	8	0.244
810	pCF12_AZI	AZI	4	pCF12	Plasmid_Carrier	8	0.244
820	pCF12_AZI	AZI	4	pCF12	Plasmid_Carrier	8	0.244
830	pCF12_AZI	AZI	4	pCF12	Plasmid_Carrier	8	0.243
840	pCF12_AZI	AZI	4	pCF12	Plasmid_Carrier	8	0.242
850	pCF12_AZI	AZI	4	pCF12	Plasmid_Carrier	8	0.242
860	pCF12_AZI	AZI	4	pCF12	Plasmid_Carrier	8	0.242
870	pCF12_AZI	AZI	4	pCF12	Plasmid_Carrier	8	0.241
880	pCF12_AZI	AZI	4	pCF12	Plasmid_Carrier	8	0.241
890	pCF12_AZI	AZI	4	pCF12	Plasmid_Carrier	8	0.241
900	pCF12_AZI	AZI	4	pCF12	Plasmid_Carrier	8	0.241
910	pCF12_AZI	AZI	4	pCF12	Plasmid_Carrier	8	0.241
920	pCF12_AZI	AZI	4	pCF12	Plasmid_Carrier	8	0.241
930	pCF12_AZI	AZI	4	pCF12	Plasmid_Carrier	8	0.241
940	pCF12_AZI	AZI	4	pCF12	Plasmid_Carrier	8	0.241
950	pCF12_AZI	AZI	4	pCF12	Plasmid_Carrier	8	0.241
960	pCF12_AZI	AZI	4	pCF12	Plasmid_Carrier	8	0.241
970	pCF12_AZI	AZI	4	pCF12	Plasmid_Carrier	8	0.241
980	pCF12_AZI	AZI	4	pCF12	Plasmid_Carrier	8	0.241
990	pCF12_AZI	AZI	4	pCF12	Plasmid_Carrier	8	0.241
1000	pCF12_AZI	AZI	4	pCF12	Plasmid_Carrier	8	0.24
1010	pCF12_AZI	AZI	4	pCF12	Plasmid_Carrier	8	0.24
1020	pCF12_AZI	AZI	4	pCF12	Plasmid_Carrier	8	0.24
1030	pCF12_AZI	AZI	4	pCF12	Plasmid_Carrier	8	0.24
1040	pCF12_AZI	AZI	4	pCF12	Plasmid_Carrier	8	0.24
1050	pCF12_AZI	AZI	4	pCF12	Plasmid_Carrier	8	0.24
1060	pCF12_AZI	AZI	4	pCF12	Plasmid_Carrier	8	0.24
1070	pCF12_AZI	AZI	4	pCF12	Plasmid_Carrier	8	0.239
1080	pCF12_AZI	AZI	4	pCF12	Plasmid_Carrier	8	0.239
1090	pCF12_AZI	AZI	4	pCF12	Plasmid_Carrier	8	0.239
1100	pCF12_AZI	AZI	4	pCF12	Plasmid_Carrier	8	0.239
1110	pCF12_AZI	AZI	4	pCF12	Plasmid_Carrier	8	0.239
1120	pCF12_AZI	AZI	4	pCF12	Plasmid_Carrier	8	0.239
1130	pCF12_AZI	AZI	4	pCF12	Plasmid_Carrier	8	0.238
1140	pCF12_AZI	AZI	4	pCF12	Plasmid_Carrier	8	0.237
1150	pCF12_AZI	AZI	4	pCF12	Plasmid_Carrier	8	0.237
1160	pCF12_AZI	AZI	4	pCF12	Plasmid_Carrier	8	0.237
1170	pCF12_AZI	AZI	4	pCF12	Plasmid_Carrier	8	0.236
1180	pCF12_AZI	AZI	4	pCF12	Plasmid_Carrier	8	0.236
1190	pCF12_AZI	AZI	4	pCF12	Plasmid_Carrier	8	0.235
1200	pCF12_AZI	AZI	4	pCF12	Plasmid_Carrier	8	0.234
1210	pCF12_AZI	AZI	4	pCF12	Plasmid_Carrier	8	0.234
1220	pCF12_AZI	AZI	4	pCF12	Plasmid_Carrier	8	0.234
1230	pCF12_AZI	AZI	4	pCF12	Plasmid_Carrier	8	0.233
1240	pCF12_AZI	AZI	4	pCF12	Plasmid_Carrier	8	0.233
1250	pCF12_AZI	AZI	4	pCF12	Plasmid_Carrier	8	0.232
1260	pCF12_AZI	AZI	4	pCF12	Plasmid_Carrier	8	0.232
1270	pCF12_AZI	AZI	4	pCF12	Plasmid_Carrier	8	0.231
1280	pCF12_AZI	AZI	4	pCF12	Plasmid_Carrier	8	0.231
1290	pCF12_AZI	AZI	4	pCF12	Plasmid_Carrier	8	0.23
1300	pCF12_AZI	AZI	4	pCF12	Plasmid_Carrier	8	0.23
1310	pCF12_AZI	AZI	4	pCF12	Plasmid_Carrier	8	0.23
1320	pCF12_AZI	AZI	4	pCF12	Plasmid_Carrier	8	0.229
1330	pCF12_AZI	AZI	4	pCF12	Plasmid_Carrier	8	0.229
1340	pCF12_AZI	AZI	4	pCF12	Plasmid_Carrier	8	0.229
1350	pCF12_AZI	AZI	4	pCF12	Plasmid_Carrier	8	0.229
1360	pCF12_AZI	AZI	4	pCF12	Plasmid_Carrier	8	0.228
1370	pCF12_AZI	AZI	4	pCF12	Plasmid_Carrier	8	0.228
1380	pCF12_AZI	AZI	4	pCF12	Plasmid_Carrier	8	0.228
1390	pCF12_AZI	AZI	4	pCF12	Plasmid_Carrier	8	0.228
1400	pCF12_AZI	AZI	4	pCF12	Plasmid_Carrier	8	0.227
1410	pCF12_AZI	AZI	4	pCF12	Plasmid_Carrier	8	0.227
1420	pCF12_AZI	AZI	4	pCF12	Plasmid_Carrier	8	0.227
1430	pCF12_AZI	AZI	4	pCF12	Plasmid_Carrier	8	0.227
1440	pCF12_AZI	AZI	4	pCF12	Plasmid_Carrier	8	0.227
0	pCF12_AZI	AZI	4	pCF12	Plasmid_Carrier	9	0.113
10	pCF12_AZI	AZI	4	pCF12	Plasmid_Carrier	9	0.097
20	pCF12_AZI	AZI	4	pCF12	Plasmid_Carrier	9	0.098
30	pCF12_AZI	AZI	4	pCF12	Plasmid_Carrier	9	0.099
40	pCF12_AZI	AZI	4	pCF12	Plasmid_Carrier	9	0.101
50	pCF12_AZI	AZI	4	pCF12	Plasmid_Carrier	9	0.103
60	pCF12_AZI	AZI	4	pCF12	Plasmid_Carrier	9	0.106
70	pCF12_AZI	AZI	4	pCF12	Plasmid_Carrier	9	0.111
80	pCF12_AZI	AZI	4	pCF12	Plasmid_Carrier	9	0.117
90	pCF12_AZI	AZI	4	pCF12	Plasmid_Carrier	9	0.126
100	pCF12_AZI	AZI	4	pCF12	Plasmid_Carrier	9	0.137
110	pCF12_AZI	AZI	4	pCF12	Plasmid_Carrier	9	0.148
120	pCF12_AZI	AZI	4	pCF12	Plasmid_Carrier	9	0.158
130	pCF12_AZI	AZI	4	pCF12	Plasmid_Carrier	9	0.169
140	pCF12_AZI	AZI	4	pCF12	Plasmid_Carrier	9	0.178
150	pCF12_AZI	AZI	4	pCF12	Plasmid_Carrier	9	0.186
160	pCF12_AZI	AZI	4	pCF12	Plasmid_Carrier	9	0.194
170	pCF12_AZI	AZI	4	pCF12	Plasmid_Carrier	9	0.203
180	pCF12_AZI	AZI	4	pCF12	Plasmid_Carrier	9	0.211
190	pCF12_AZI	AZI	4	pCF12	Plasmid_Carrier	9	0.22
200	pCF12_AZI	AZI	4	pCF12	Plasmid_Carrier	9	0.227
210	pCF12_AZI	AZI	4	pCF12	Plasmid_Carrier	9	0.235
220	pCF12_AZI	AZI	4	pCF12	Plasmid_Carrier	9	0.24
230	pCF12_AZI	AZI	4	pCF12	Plasmid_Carrier	9	0.247
240	pCF12_AZI	AZI	4	pCF12	Plasmid_Carrier	9	0.253
250	pCF12_AZI	AZI	4	pCF12	Plasmid_Carrier	9	0.258
260	pCF12_AZI	AZI	4	pCF12	Plasmid_Carrier	9	0.261
270	pCF12_AZI	AZI	4	pCF12	Plasmid_Carrier	9	0.266
280	pCF12_AZI	AZI	4	pCF12	Plasmid_Carrier	9	0.269
290	pCF12_AZI	AZI	4	pCF12	Plasmid_Carrier	9	0.274
300	pCF12_AZI	AZI	4	pCF12	Plasmid_Carrier	9	0.277
310	pCF12_AZI	AZI	4	pCF12	Plasmid_Carrier	9	0.283
320	pCF12_AZI	AZI	4	pCF12	Plasmid_Carrier	9	0.284
330	pCF12_AZI	AZI	4	pCF12	Plasmid_Carrier	9	0.288
340	pCF12_AZI	AZI	4	pCF12	Plasmid_Carrier	9	0.292
350	pCF12_AZI	AZI	4	pCF12	Plasmid_Carrier	9	0.294
360	pCF12_AZI	AZI	4	pCF12	Plasmid_Carrier	9	0.297
370	pCF12_AZI	AZI	4	pCF12	Plasmid_Carrier	9	0.3
380	pCF12_AZI	AZI	4	pCF12	Plasmid_Carrier	9	0.302
390	pCF12_AZI	AZI	4	pCF12	Plasmid_Carrier	9	0.303
400	pCF12_AZI	AZI	4	pCF12	Plasmid_Carrier	9	0.306
410	pCF12_AZI	AZI	4	pCF12	Plasmid_Carrier	9	0.311
420	pCF12_AZI	AZI	4	pCF12	Plasmid_Carrier	9	0.315
430	pCF12_AZI	AZI	4	pCF12	Plasmid_Carrier	9	0.316
440	pCF12_AZI	AZI	4	pCF12	Plasmid_Carrier	9	0.316
450	pCF12_AZI	AZI	4	pCF12	Plasmid_Carrier	9	0.316
460	pCF12_AZI	AZI	4	pCF12	Plasmid_Carrier	9	0.318
470	pCF12_AZI	AZI	4	pCF12	Plasmid_Carrier	9	0.319
480	pCF12_AZI	AZI	4	pCF12	Plasmid_Carrier	9	0.321
490	pCF12_AZI	AZI	4	pCF12	Plasmid_Carrier	9	0.322
500	pCF12_AZI	AZI	4	pCF12	Plasmid_Carrier	9	0.322
510	pCF12_AZI	AZI	4	pCF12	Plasmid_Carrier	9	0.323
520	pCF12_AZI	AZI	4	pCF12	Plasmid_Carrier	9	0.323
530	pCF12_AZI	AZI	4	pCF12	Plasmid_Carrier	9	0.322
540	pCF12_AZI	AZI	4	pCF12	Plasmid_Carrier	9	0.324
550	pCF12_AZI	AZI	4	pCF12	Plasmid_Carrier	9	0.324
560	pCF12_AZI	AZI	4	pCF12	Plasmid_Carrier	9	0.325
570	pCF12_AZI	AZI	4	pCF12	Plasmid_Carrier	9	0.325
580	pCF12_AZI	AZI	4	pCF12	Plasmid_Carrier	9	0.324
590	pCF12_AZI	AZI	4	pCF12	Plasmid_Carrier	9	0.326
600	pCF12_AZI	AZI	4	pCF12	Plasmid_Carrier	9	0.326
610	pCF12_AZI	AZI	4	pCF12	Plasmid_Carrier	9	0.326
620	pCF12_AZI	AZI	4	pCF12	Plasmid_Carrier	9	0.325
630	pCF12_AZI	AZI	4	pCF12	Plasmid_Carrier	9	0.325
640	pCF12_AZI	AZI	4	pCF12	Plasmid_Carrier	9	0.325
650	pCF12_AZI	AZI	4	pCF12	Plasmid_Carrier	9	0.324
660	pCF12_AZI	AZI	4	pCF12	Plasmid_Carrier	9	0.323
670	pCF12_AZI	AZI	4	pCF12	Plasmid_Carrier	9	0.322
680	pCF12_AZI	AZI	4	pCF12	Plasmid_Carrier	9	0.322
690	pCF12_AZI	AZI	4	pCF12	Plasmid_Carrier	9	0.321
700	pCF12_AZI	AZI	4	pCF12	Plasmid_Carrier	9	0.321
710	pCF12_AZI	AZI	4	pCF12	Plasmid_Carrier	9	0.32
720	pCF12_AZI	AZI	4	pCF12	Plasmid_Carrier	9	0.319
730	pCF12_AZI	AZI	4	pCF12	Plasmid_Carrier	9	0.318
740	pCF12_AZI	AZI	4	pCF12	Plasmid_Carrier	9	0.317
750	pCF12_AZI	AZI	4	pCF12	Plasmid_Carrier	9	0.318
760	pCF12_AZI	AZI	4	pCF12	Plasmid_Carrier	9	0.317
770	pCF12_AZI	AZI	4	pCF12	Plasmid_Carrier	9	0.316
780	pCF12_AZI	AZI	4	pCF12	Plasmid_Carrier	9	0.314
790	pCF12_AZI	AZI	4	pCF12	Plasmid_Carrier	9	0.313
800	pCF12_AZI	AZI	4	pCF12	Plasmid_Carrier	9	0.311
810	pCF12_AZI	AZI	4	pCF12	Plasmid_Carrier	9	0.311
820	pCF12_AZI	AZI	4	pCF12	Plasmid_Carrier	9	0.31
830	pCF12_AZI	AZI	4	pCF12	Plasmid_Carrier	9	0.311
840	pCF12_AZI	AZI	4	pCF12	Plasmid_Carrier	9	0.31
850	pCF12_AZI	AZI	4	pCF12	Plasmid_Carrier	9	0.308
860	pCF12_AZI	AZI	4	pCF12	Plasmid_Carrier	9	0.307
870	pCF12_AZI	AZI	4	pCF12	Plasmid_Carrier	9	0.306
880	pCF12_AZI	AZI	4	pCF12	Plasmid_Carrier	9	0.305
890	pCF12_AZI	AZI	4	pCF12	Plasmid_Carrier	9	0.304
900	pCF12_AZI	AZI	4	pCF12	Plasmid_Carrier	9	0.303
910	pCF12_AZI	AZI	4	pCF12	Plasmid_Carrier	9	0.303
920	pCF12_AZI	AZI	4	pCF12	Plasmid_Carrier	9	0.301
930	pCF12_AZI	AZI	4	pCF12	Plasmid_Carrier	9	0.3
940	pCF12_AZI	AZI	4	pCF12	Plasmid_Carrier	9	0.299
950	pCF12_AZI	AZI	4	pCF12	Plasmid_Carrier	9	0.299
960	pCF12_AZI	AZI	4	pCF12	Plasmid_Carrier	9	0.298
970	pCF12_AZI	AZI	4	pCF12	Plasmid_Carrier	9	0.297
980	pCF12_AZI	AZI	4	pCF12	Plasmid_Carrier	9	0.296
990	pCF12_AZI	AZI	4	pCF12	Plasmid_Carrier	9	0.295
1000	pCF12_AZI	AZI	4	pCF12	Plasmid_Carrier	9	0.294
1010	pCF12_AZI	AZI	4	pCF12	Plasmid_Carrier	9	0.293
1020	pCF12_AZI	AZI	4	pCF12	Plasmid_Carrier	9	0.293
1030	pCF12_AZI	AZI	4	pCF12	Plasmid_Carrier	9	0.291
1040	pCF12_AZI	AZI	4	pCF12	Plasmid_Carrier	9	0.291
1050	pCF12_AZI	AZI	4	pCF12	Plasmid_Carrier	9	0.29
1060	pCF12_AZI	AZI	4	pCF12	Plasmid_Carrier	9	0.289
1070	pCF12_AZI	AZI	4	pCF12	Plasmid_Carrier	9	0.288
1080	pCF12_AZI	AZI	4	pCF12	Plasmid_Carrier	9	0.287
1090	pCF12_AZI	AZI	4	pCF12	Plasmid_Carrier	9	0.286
1100	pCF12_AZI	AZI	4	pCF12	Plasmid_Carrier	9	0.285
1110	pCF12_AZI	AZI	4	pCF12	Plasmid_Carrier	9	0.285
1120	pCF12_AZI	AZI	4	pCF12	Plasmid_Carrier	9	0.284
1130	pCF12_AZI	AZI	4	pCF12	Plasmid_Carrier	9	0.283
1140	pCF12_AZI	AZI	4	pCF12	Plasmid_Carrier	9	0.282
1150	pCF12_AZI	AZI	4	pCF12	Plasmid_Carrier	9	0.281
1160	pCF12_AZI	AZI	4	pCF12	Plasmid_Carrier	9	0.281
1170	pCF12_AZI	AZI	4	pCF12	Plasmid_Carrier	9	0.28
1180	pCF12_AZI	AZI	4	pCF12	Plasmid_Carrier	9	0.279
1190	pCF12_AZI	AZI	4	pCF12	Plasmid_Carrier	9	0.278
1200	pCF12_AZI	AZI	4	pCF12	Plasmid_Carrier	9	0.277
1210	pCF12_AZI	AZI	4	pCF12	Plasmid_Carrier	9	0.277
1220	pCF12_AZI	AZI	4	pCF12	Plasmid_Carrier	9	0.276
1230	pCF12_AZI	AZI	4	pCF12	Plasmid_Carrier	9	0.275
1240	pCF12_AZI	AZI	4	pCF12	Plasmid_Carrier	9	0.273
1250	pCF12_AZI	AZI	4	pCF12	Plasmid_Carrier	9	0.273
1260	pCF12_AZI	AZI	4	pCF12	Plasmid_Carrier	9	0.271
1270	pCF12_AZI	AZI	4	pCF12	Plasmid_Carrier	9	0.271
1280	pCF12_AZI	AZI	4	pCF12	Plasmid_Carrier	9	0.27
1290	pCF12_AZI	AZI	4	pCF12	Plasmid_Carrier	9	0.269
1300	pCF12_AZI	AZI	4	pCF12	Plasmid_Carrier	9	0.268
1310	pCF12_AZI	AZI	4	pCF12	Plasmid_Carrier	9	0.267
1320	pCF12_AZI	AZI	4	pCF12	Plasmid_Carrier	9	0.266
1330	pCF12_AZI	AZI	4	pCF12	Plasmid_Carrier	9	0.265
1340	pCF12_AZI	AZI	4	pCF12	Plasmid_Carrier	9	0.265
1350	pCF12_AZI	AZI	4	pCF12	Plasmid_Carrier	9	0.264
1360	pCF12_AZI	AZI	4	pCF12	Plasmid_Carrier	9	0.263
1370	pCF12_AZI	AZI	4	pCF12	Plasmid_Carrier	9	0.262
1380	pCF12_AZI	AZI	4	pCF12	Plasmid_Carrier	9	0.261
1390	pCF12_AZI	AZI	4	pCF12	Plasmid_Carrier	9	0.26
1400	pCF12_AZI	AZI	4	pCF12	Plasmid_Carrier	9	0.26
1410	pCF12_AZI	AZI	4	pCF12	Plasmid_Carrier	9	0.259
1420	pCF12_AZI	AZI	4	pCF12	Plasmid_Carrier	9	0.258
1430	pCF12_AZI	AZI	4	pCF12	Plasmid_Carrier	9	0.257
1440	pCF12_AZI	AZI	4	pCF12	Plasmid_Carrier	9	0.256
0	pCF12_AZI	AZI	4	pCF12	Plasmid_Carrier	10	0.114
10	pCF12_AZI	AZI	4	pCF12	Plasmid_Carrier	10	0.095
20	pCF12_AZI	AZI	4	pCF12	Plasmid_Carrier	10	0.095
30	pCF12_AZI	AZI	4	pCF12	Plasmid_Carrier	10	0.094
40	pCF12_AZI	AZI	4	pCF12	Plasmid_Carrier	10	0.095
50	pCF12_AZI	AZI	4	pCF12	Plasmid_Carrier	10	0.095
60	pCF12_AZI	AZI	4	pCF12	Plasmid_Carrier	10	0.096
70	pCF12_AZI	AZI	4	pCF12	Plasmid_Carrier	10	0.097
80	pCF12_AZI	AZI	4	pCF12	Plasmid_Carrier	10	0.099
90	pCF12_AZI	AZI	4	pCF12	Plasmid_Carrier	10	0.101
100	pCF12_AZI	AZI	4	pCF12	Plasmid_Carrier	10	0.104
110	pCF12_AZI	AZI	4	pCF12	Plasmid_Carrier	10	0.109
120	pCF12_AZI	AZI	4	pCF12	Plasmid_Carrier	10	0.114
130	pCF12_AZI	AZI	4	pCF12	Plasmid_Carrier	10	0.121
140	pCF12_AZI	AZI	4	pCF12	Plasmid_Carrier	10	0.129
150	pCF12_AZI	AZI	4	pCF12	Plasmid_Carrier	10	0.138
160	pCF12_AZI	AZI	4	pCF12	Plasmid_Carrier	10	0.147
170	pCF12_AZI	AZI	4	pCF12	Plasmid_Carrier	10	0.155
180	pCF12_AZI	AZI	4	pCF12	Plasmid_Carrier	10	0.162
190	pCF12_AZI	AZI	4	pCF12	Plasmid_Carrier	10	0.167
200	pCF12_AZI	AZI	4	pCF12	Plasmid_Carrier	10	0.173
210	pCF12_AZI	AZI	4	pCF12	Plasmid_Carrier	10	0.177
220	pCF12_AZI	AZI	4	pCF12	Plasmid_Carrier	10	0.184
230	pCF12_AZI	AZI	4	pCF12	Plasmid_Carrier	10	0.19
240	pCF12_AZI	AZI	4	pCF12	Plasmid_Carrier	10	0.194
250	pCF12_AZI	AZI	4	pCF12	Plasmid_Carrier	10	0.198
260	pCF12_AZI	AZI	4	pCF12	Plasmid_Carrier	10	0.204
270	pCF12_AZI	AZI	4	pCF12	Plasmid_Carrier	10	0.209
280	pCF12_AZI	AZI	4	pCF12	Plasmid_Carrier	10	0.213
290	pCF12_AZI	AZI	4	pCF12	Plasmid_Carrier	10	0.215
300	pCF12_AZI	AZI	4	pCF12	Plasmid_Carrier	10	0.219
310	pCF12_AZI	AZI	4	pCF12	Plasmid_Carrier	10	0.224
320	pCF12_AZI	AZI	4	pCF12	Plasmid_Carrier	10	0.225
330	pCF12_AZI	AZI	4	pCF12	Plasmid_Carrier	10	0.229
340	pCF12_AZI	AZI	4	pCF12	Plasmid_Carrier	10	0.231
350	pCF12_AZI	AZI	4	pCF12	Plasmid_Carrier	10	0.233
360	pCF12_AZI	AZI	4	pCF12	Plasmid_Carrier	10	0.235
370	pCF12_AZI	AZI	4	pCF12	Plasmid_Carrier	10	0.239
380	pCF12_AZI	AZI	4	pCF12	Plasmid_Carrier	10	0.24
390	pCF12_AZI	AZI	4	pCF12	Plasmid_Carrier	10	0.242
400	pCF12_AZI	AZI	4	pCF12	Plasmid_Carrier	10	0.243
410	pCF12_AZI	AZI	4	pCF12	Plasmid_Carrier	10	0.247
420	pCF12_AZI	AZI	4	pCF12	Plasmid_Carrier	10	0.247
430	pCF12_AZI	AZI	4	pCF12	Plasmid_Carrier	10	0.251
440	pCF12_AZI	AZI	4	pCF12	Plasmid_Carrier	10	0.251
450	pCF12_AZI	AZI	4	pCF12	Plasmid_Carrier	10	0.253
460	pCF12_AZI	AZI	4	pCF12	Plasmid_Carrier	10	0.256
470	pCF12_AZI	AZI	4	pCF12	Plasmid_Carrier	10	0.257
480	pCF12_AZI	AZI	4	pCF12	Plasmid_Carrier	10	0.259
490	pCF12_AZI	AZI	4	pCF12	Plasmid_Carrier	10	0.261
500	pCF12_AZI	AZI	4	pCF12	Plasmid_Carrier	10	0.261
510	pCF12_AZI	AZI	4	pCF12	Plasmid_Carrier	10	0.263
520	pCF12_AZI	AZI	4	pCF12	Plasmid_Carrier	10	0.265
530	pCF12_AZI	AZI	4	pCF12	Plasmid_Carrier	10	0.267
540	pCF12_AZI	AZI	4	pCF12	Plasmid_Carrier	10	0.268
550	pCF12_AZI	AZI	4	pCF12	Plasmid_Carrier	10	0.269
560	pCF12_AZI	AZI	4	pCF12	Plasmid_Carrier	10	0.271
570	pCF12_AZI	AZI	4	pCF12	Plasmid_Carrier	10	0.274
580	pCF12_AZI	AZI	4	pCF12	Plasmid_Carrier	10	0.274
590	pCF12_AZI	AZI	4	pCF12	Plasmid_Carrier	10	0.276
600	pCF12_AZI	AZI	4	pCF12	Plasmid_Carrier	10	0.278
610	pCF12_AZI	AZI	4	pCF12	Plasmid_Carrier	10	0.278
620	pCF12_AZI	AZI	4	pCF12	Plasmid_Carrier	10	0.277
630	pCF12_AZI	AZI	4	pCF12	Plasmid_Carrier	10	0.28
640	pCF12_AZI	AZI	4	pCF12	Plasmid_Carrier	10	0.28
650	pCF12_AZI	AZI	4	pCF12	Plasmid_Carrier	10	0.282
660	pCF12_AZI	AZI	4	pCF12	Plasmid_Carrier	10	0.282
670	pCF12_AZI	AZI	4	pCF12	Plasmid_Carrier	10	0.282
680	pCF12_AZI	AZI	4	pCF12	Plasmid_Carrier	10	0.282
690	pCF12_AZI	AZI	4	pCF12	Plasmid_Carrier	10	0.283
700	pCF12_AZI	AZI	4	pCF12	Plasmid_Carrier	10	0.283
710	pCF12_AZI	AZI	4	pCF12	Plasmid_Carrier	10	0.28
720	pCF12_AZI	AZI	4	pCF12	Plasmid_Carrier	10	0.282
730	pCF12_AZI	AZI	4	pCF12	Plasmid_Carrier	10	0.282
740	pCF12_AZI	AZI	4	pCF12	Plasmid_Carrier	10	0.281
750	pCF12_AZI	AZI	4	pCF12	Plasmid_Carrier	10	0.282
760	pCF12_AZI	AZI	4	pCF12	Plasmid_Carrier	10	0.281
770	pCF12_AZI	AZI	4	pCF12	Plasmid_Carrier	10	0.28
780	pCF12_AZI	AZI	4	pCF12	Plasmid_Carrier	10	0.281
790	pCF12_AZI	AZI	4	pCF12	Plasmid_Carrier	10	0.279
800	pCF12_AZI	AZI	4	pCF12	Plasmid_Carrier	10	0.278
810	pCF12_AZI	AZI	4	pCF12	Plasmid_Carrier	10	0.278
820	pCF12_AZI	AZI	4	pCF12	Plasmid_Carrier	10	0.277
830	pCF12_AZI	AZI	4	pCF12	Plasmid_Carrier	10	0.276
840	pCF12_AZI	AZI	4	pCF12	Plasmid_Carrier	10	0.276
850	pCF12_AZI	AZI	4	pCF12	Plasmid_Carrier	10	0.275
860	pCF12_AZI	AZI	4	pCF12	Plasmid_Carrier	10	0.275
870	pCF12_AZI	AZI	4	pCF12	Plasmid_Carrier	10	0.273
880	pCF12_AZI	AZI	4	pCF12	Plasmid_Carrier	10	0.273
890	pCF12_AZI	AZI	4	pCF12	Plasmid_Carrier	10	0.272
900	pCF12_AZI	AZI	4	pCF12	Plasmid_Carrier	10	0.271
910	pCF12_AZI	AZI	4	pCF12	Plasmid_Carrier	10	0.27
920	pCF12_AZI	AZI	4	pCF12	Plasmid_Carrier	10	0.269
930	pCF12_AZI	AZI	4	pCF12	Plasmid_Carrier	10	0.268
940	pCF12_AZI	AZI	4	pCF12	Plasmid_Carrier	10	0.267
950	pCF12_AZI	AZI	4	pCF12	Plasmid_Carrier	10	0.267
960	pCF12_AZI	AZI	4	pCF12	Plasmid_Carrier	10	0.265
970	pCF12_AZI	AZI	4	pCF12	Plasmid_Carrier	10	0.264
980	pCF12_AZI	AZI	4	pCF12	Plasmid_Carrier	10	0.264
990	pCF12_AZI	AZI	4	pCF12	Plasmid_Carrier	10	0.263
1000	pCF12_AZI	AZI	4	pCF12	Plasmid_Carrier	10	0.262
1010	pCF12_AZI	AZI	4	pCF12	Plasmid_Carrier	10	0.261
1020	pCF12_AZI	AZI	4	pCF12	Plasmid_Carrier	10	0.261
1030	pCF12_AZI	AZI	4	pCF12	Plasmid_Carrier	10	0.26
1040	pCF12_AZI	AZI	4	pCF12	Plasmid_Carrier	10	0.26
1050	pCF12_AZI	AZI	4	pCF12	Plasmid_Carrier	10	0.259
1060	pCF12_AZI	AZI	4	pCF12	Plasmid_Carrier	10	0.259
1070	pCF12_AZI	AZI	4	pCF12	Plasmid_Carrier	10	0.259
1080	pCF12_AZI	AZI	4	pCF12	Plasmid_Carrier	10	0.258
1090	pCF12_AZI	AZI	4	pCF12	Plasmid_Carrier	10	0.258
1100	pCF12_AZI	AZI	4	pCF12	Plasmid_Carrier	10	0.258
1110	pCF12_AZI	AZI	4	pCF12	Plasmid_Carrier	10	0.257
1120	pCF12_AZI	AZI	4	pCF12	Plasmid_Carrier	10	0.257
1130	pCF12_AZI	AZI	4	pCF12	Plasmid_Carrier	10	0.257
1140	pCF12_AZI	AZI	4	pCF12	Plasmid_Carrier	10	0.257
1150	pCF12_AZI	AZI	4	pCF12	Plasmid_Carrier	10	0.256
1160	pCF12_AZI	AZI	4	pCF12	Plasmid_Carrier	10	0.256
1170	pCF12_AZI	AZI	4	pCF12	Plasmid_Carrier	10	0.256
1180	pCF12_AZI	AZI	4	pCF12	Plasmid_Carrier	10	0.255
1190	pCF12_AZI	AZI	4	pCF12	Plasmid_Carrier	10	0.255
1200	pCF12_AZI	AZI	4	pCF12	Plasmid_Carrier	10	0.254
1210	pCF12_AZI	AZI	4	pCF12	Plasmid_Carrier	10	0.254
1220	pCF12_AZI	AZI	4	pCF12	Plasmid_Carrier	10	0.254
1230	pCF12_AZI	AZI	4	pCF12	Plasmid_Carrier	10	0.254
1240	pCF12_AZI	AZI	4	pCF12	Plasmid_Carrier	10	0.253
1250	pCF12_AZI	AZI	4	pCF12	Plasmid_Carrier	10	0.253
1260	pCF12_AZI	AZI	4	pCF12	Plasmid_Carrier	10	0.253
1270	pCF12_AZI	AZI	4	pCF12	Plasmid_Carrier	10	0.252
1280	pCF12_AZI	AZI	4	pCF12	Plasmid_Carrier	10	0.252
1290	pCF12_AZI	AZI	4	pCF12	Plasmid_Carrier	10	0.252
1300	pCF12_AZI	AZI	4	pCF12	Plasmid_Carrier	10	0.252
1310	pCF12_AZI	AZI	4	pCF12	Plasmid_Carrier	10	0.251
1320	pCF12_AZI	AZI	4	pCF12	Plasmid_Carrier	10	0.251
1330	pCF12_AZI	AZI	4	pCF12	Plasmid_Carrier	10	0.251
1340	pCF12_AZI	AZI	4	pCF12	Plasmid_Carrier	10	0.251
1350	pCF12_AZI	AZI	4	pCF12	Plasmid_Carrier	10	0.25
1360	pCF12_AZI	AZI	4	pCF12	Plasmid_Carrier	10	0.25
1370	pCF12_AZI	AZI	4	pCF12	Plasmid_Carrier	10	0.25
1380	pCF12_AZI	AZI	4	pCF12	Plasmid_Carrier	10	0.249
1390	pCF12_AZI	AZI	4	pCF12	Plasmid_Carrier	10	0.249
1400	pCF12_AZI	AZI	4	pCF12	Plasmid_Carrier	10	0.248
1410	pCF12_AZI	AZI	4	pCF12	Plasmid_Carrier	10	0.248
1420	pCF12_AZI	AZI	4	pCF12	Plasmid_Carrier	10	0.247
1430	pCF12_AZI	AZI	4	pCF12	Plasmid_Carrier	10	0.247
1440	pCF12_AZI	AZI	4	pCF12	Plasmid_Carrier	10	0.247
0	pCF12_AZI	AZI	4	pCF12	Plasmid_Carrier	11	0.111
10	pCF12_AZI	AZI	4	pCF12	Plasmid_Carrier	11	0.096
20	pCF12_AZI	AZI	4	pCF12	Plasmid_Carrier	11	0.096
30	pCF12_AZI	AZI	4	pCF12	Plasmid_Carrier	11	0.096
40	pCF12_AZI	AZI	4	pCF12	Plasmid_Carrier	11	0.097
50	pCF12_AZI	AZI	4	pCF12	Plasmid_Carrier	11	0.099
60	pCF12_AZI	AZI	4	pCF12	Plasmid_Carrier	11	0.1
70	pCF12_AZI	AZI	4	pCF12	Plasmid_Carrier	11	0.102
80	pCF12_AZI	AZI	4	pCF12	Plasmid_Carrier	11	0.105
90	pCF12_AZI	AZI	4	pCF12	Plasmid_Carrier	11	0.11
100	pCF12_AZI	AZI	4	pCF12	Plasmid_Carrier	11	0.117
110	pCF12_AZI	AZI	4	pCF12	Plasmid_Carrier	11	0.125
120	pCF12_AZI	AZI	4	pCF12	Plasmid_Carrier	11	0.134
130	pCF12_AZI	AZI	4	pCF12	Plasmid_Carrier	11	0.145
140	pCF12_AZI	AZI	4	pCF12	Plasmid_Carrier	11	0.154
150	pCF12_AZI	AZI	4	pCF12	Plasmid_Carrier	11	0.163
160	pCF12_AZI	AZI	4	pCF12	Plasmid_Carrier	11	0.173
170	pCF12_AZI	AZI	4	pCF12	Plasmid_Carrier	11	0.177
180	pCF12_AZI	AZI	4	pCF12	Plasmid_Carrier	11	0.184
190	pCF12_AZI	AZI	4	pCF12	Plasmid_Carrier	11	0.189
200	pCF12_AZI	AZI	4	pCF12	Plasmid_Carrier	11	0.195
210	pCF12_AZI	AZI	4	pCF12	Plasmid_Carrier	11	0.201
220	pCF12_AZI	AZI	4	pCF12	Plasmid_Carrier	11	0.207
230	pCF12_AZI	AZI	4	pCF12	Plasmid_Carrier	11	0.211
240	pCF12_AZI	AZI	4	pCF12	Plasmid_Carrier	11	0.218
250	pCF12_AZI	AZI	4	pCF12	Plasmid_Carrier	11	0.221
260	pCF12_AZI	AZI	4	pCF12	Plasmid_Carrier	11	0.226
270	pCF12_AZI	AZI	4	pCF12	Plasmid_Carrier	11	0.232
280	pCF12_AZI	AZI	4	pCF12	Plasmid_Carrier	11	0.234
290	pCF12_AZI	AZI	4	pCF12	Plasmid_Carrier	11	0.238
300	pCF12_AZI	AZI	4	pCF12	Plasmid_Carrier	11	0.242
310	pCF12_AZI	AZI	4	pCF12	Plasmid_Carrier	11	0.244
320	pCF12_AZI	AZI	4	pCF12	Plasmid_Carrier	11	0.247
330	pCF12_AZI	AZI	4	pCF12	Plasmid_Carrier	11	0.249
340	pCF12_AZI	AZI	4	pCF12	Plasmid_Carrier	11	0.252
350	pCF12_AZI	AZI	4	pCF12	Plasmid_Carrier	11	0.253
360	pCF12_AZI	AZI	4	pCF12	Plasmid_Carrier	11	0.256
370	pCF12_AZI	AZI	4	pCF12	Plasmid_Carrier	11	0.258
380	pCF12_AZI	AZI	4	pCF12	Plasmid_Carrier	11	0.261
390	pCF12_AZI	AZI	4	pCF12	Plasmid_Carrier	11	0.264
400	pCF12_AZI	AZI	4	pCF12	Plasmid_Carrier	11	0.267
410	pCF12_AZI	AZI	4	pCF12	Plasmid_Carrier	11	0.27
420	pCF12_AZI	AZI	4	pCF12	Plasmid_Carrier	11	0.271
430	pCF12_AZI	AZI	4	pCF12	Plasmid_Carrier	11	0.274
440	pCF12_AZI	AZI	4	pCF12	Plasmid_Carrier	11	0.275
450	pCF12_AZI	AZI	4	pCF12	Plasmid_Carrier	11	0.276
460	pCF12_AZI	AZI	4	pCF12	Plasmid_Carrier	11	0.277
470	pCF12_AZI	AZI	4	pCF12	Plasmid_Carrier	11	0.278
480	pCF12_AZI	AZI	4	pCF12	Plasmid_Carrier	11	0.28
490	pCF12_AZI	AZI	4	pCF12	Plasmid_Carrier	11	0.281
500	pCF12_AZI	AZI	4	pCF12	Plasmid_Carrier	11	0.283
510	pCF12_AZI	AZI	4	pCF12	Plasmid_Carrier	11	0.284
520	pCF12_AZI	AZI	4	pCF12	Plasmid_Carrier	11	0.283
530	pCF12_AZI	AZI	4	pCF12	Plasmid_Carrier	11	0.284
540	pCF12_AZI	AZI	4	pCF12	Plasmid_Carrier	11	0.283
550	pCF12_AZI	AZI	4	pCF12	Plasmid_Carrier	11	0.283
560	pCF12_AZI	AZI	4	pCF12	Plasmid_Carrier	11	0.284
570	pCF12_AZI	AZI	4	pCF12	Plasmid_Carrier	11	0.284
580	pCF12_AZI	AZI	4	pCF12	Plasmid_Carrier	11	0.284
590	pCF12_AZI	AZI	4	pCF12	Plasmid_Carrier	11	0.284
600	pCF12_AZI	AZI	4	pCF12	Plasmid_Carrier	11	0.283
610	pCF12_AZI	AZI	4	pCF12	Plasmid_Carrier	11	0.283
620	pCF12_AZI	AZI	4	pCF12	Plasmid_Carrier	11	0.284
630	pCF12_AZI	AZI	4	pCF12	Plasmid_Carrier	11	0.284
640	pCF12_AZI	AZI	4	pCF12	Plasmid_Carrier	11	0.283
650	pCF12_AZI	AZI	4	pCF12	Plasmid_Carrier	11	0.281
660	pCF12_AZI	AZI	4	pCF12	Plasmid_Carrier	11	0.28
670	pCF12_AZI	AZI	4	pCF12	Plasmid_Carrier	11	0.279
680	pCF12_AZI	AZI	4	pCF12	Plasmid_Carrier	11	0.279
690	pCF12_AZI	AZI	4	pCF12	Plasmid_Carrier	11	0.277
700	pCF12_AZI	AZI	4	pCF12	Plasmid_Carrier	11	0.276
710	pCF12_AZI	AZI	4	pCF12	Plasmid_Carrier	11	0.275
720	pCF12_AZI	AZI	4	pCF12	Plasmid_Carrier	11	0.274
730	pCF12_AZI	AZI	4	pCF12	Plasmid_Carrier	11	0.272
740	pCF12_AZI	AZI	4	pCF12	Plasmid_Carrier	11	0.27
750	pCF12_AZI	AZI	4	pCF12	Plasmid_Carrier	11	0.27
760	pCF12_AZI	AZI	4	pCF12	Plasmid_Carrier	11	0.268
770	pCF12_AZI	AZI	4	pCF12	Plasmid_Carrier	11	0.266
780	pCF12_AZI	AZI	4	pCF12	Plasmid_Carrier	11	0.266
790	pCF12_AZI	AZI	4	pCF12	Plasmid_Carrier	11	0.264
800	pCF12_AZI	AZI	4	pCF12	Plasmid_Carrier	11	0.263
810	pCF12_AZI	AZI	4	pCF12	Plasmid_Carrier	11	0.263
820	pCF12_AZI	AZI	4	pCF12	Plasmid_Carrier	11	0.262
830	pCF12_AZI	AZI	4	pCF12	Plasmid_Carrier	11	0.261
840	pCF12_AZI	AZI	4	pCF12	Plasmid_Carrier	11	0.261
850	pCF12_AZI	AZI	4	pCF12	Plasmid_Carrier	11	0.26
860	pCF12_AZI	AZI	4	pCF12	Plasmid_Carrier	11	0.26
870	pCF12_AZI	AZI	4	pCF12	Plasmid_Carrier	11	0.259
880	pCF12_AZI	AZI	4	pCF12	Plasmid_Carrier	11	0.259
890	pCF12_AZI	AZI	4	pCF12	Plasmid_Carrier	11	0.258
900	pCF12_AZI	AZI	4	pCF12	Plasmid_Carrier	11	0.258
910	pCF12_AZI	AZI	4	pCF12	Plasmid_Carrier	11	0.257
920	pCF12_AZI	AZI	4	pCF12	Plasmid_Carrier	11	0.257
930	pCF12_AZI	AZI	4	pCF12	Plasmid_Carrier	11	0.256
940	pCF12_AZI	AZI	4	pCF12	Plasmid_Carrier	11	0.256
950	pCF12_AZI	AZI	4	pCF12	Plasmid_Carrier	11	0.255
960	pCF12_AZI	AZI	4	pCF12	Plasmid_Carrier	11	0.255
970	pCF12_AZI	AZI	4	pCF12	Plasmid_Carrier	11	0.254
980	pCF12_AZI	AZI	4	pCF12	Plasmid_Carrier	11	0.254
990	pCF12_AZI	AZI	4	pCF12	Plasmid_Carrier	11	0.253
1000	pCF12_AZI	AZI	4	pCF12	Plasmid_Carrier	11	0.253
1010	pCF12_AZI	AZI	4	pCF12	Plasmid_Carrier	11	0.252
1020	pCF12_AZI	AZI	4	pCF12	Plasmid_Carrier	11	0.252
1030	pCF12_AZI	AZI	4	pCF12	Plasmid_Carrier	11	0.252
1040	pCF12_AZI	AZI	4	pCF12	Plasmid_Carrier	11	0.251
1050	pCF12_AZI	AZI	4	pCF12	Plasmid_Carrier	11	0.251
1060	pCF12_AZI	AZI	4	pCF12	Plasmid_Carrier	11	0.251
1070	pCF12_AZI	AZI	4	pCF12	Plasmid_Carrier	11	0.25
1080	pCF12_AZI	AZI	4	pCF12	Plasmid_Carrier	11	0.251
1090	pCF12_AZI	AZI	4	pCF12	Plasmid_Carrier	11	0.25
1100	pCF12_AZI	AZI	4	pCF12	Plasmid_Carrier	11	0.25
1110	pCF12_AZI	AZI	4	pCF12	Plasmid_Carrier	11	0.249
1120	pCF12_AZI	AZI	4	pCF12	Plasmid_Carrier	11	0.249
1130	pCF12_AZI	AZI	4	pCF12	Plasmid_Carrier	11	0.249
1140	pCF12_AZI	AZI	4	pCF12	Plasmid_Carrier	11	0.249
1150	pCF12_AZI	AZI	4	pCF12	Plasmid_Carrier	11	0.249
1160	pCF12_AZI	AZI	4	pCF12	Plasmid_Carrier	11	0.248
1170	pCF12_AZI	AZI	4	pCF12	Plasmid_Carrier	11	0.248
1180	pCF12_AZI	AZI	4	pCF12	Plasmid_Carrier	11	0.248
1190	pCF12_AZI	AZI	4	pCF12	Plasmid_Carrier	11	0.248
1200	pCF12_AZI	AZI	4	pCF12	Plasmid_Carrier	11	0.248
1210	pCF12_AZI	AZI	4	pCF12	Plasmid_Carrier	11	0.248
1220	pCF12_AZI	AZI	4	pCF12	Plasmid_Carrier	11	0.248
1230	pCF12_AZI	AZI	4	pCF12	Plasmid_Carrier	11	0.248
1240	pCF12_AZI	AZI	4	pCF12	Plasmid_Carrier	11	0.247
1250	pCF12_AZI	AZI	4	pCF12	Plasmid_Carrier	11	0.247
1260	pCF12_AZI	AZI	4	pCF12	Plasmid_Carrier	11	0.247
1270	pCF12_AZI	AZI	4	pCF12	Plasmid_Carrier	11	0.247
1280	pCF12_AZI	AZI	4	pCF12	Plasmid_Carrier	11	0.247
1290	pCF12_AZI	AZI	4	pCF12	Plasmid_Carrier	11	0.246
1300	pCF12_AZI	AZI	4	pCF12	Plasmid_Carrier	11	0.246
1310	pCF12_AZI	AZI	4	pCF12	Plasmid_Carrier	11	0.246
1320	pCF12_AZI	AZI	4	pCF12	Plasmid_Carrier	11	0.245
1330	pCF12_AZI	AZI	4	pCF12	Plasmid_Carrier	11	0.245
1340	pCF12_AZI	AZI	4	pCF12	Plasmid_Carrier	11	0.245
1350	pCF12_AZI	AZI	4	pCF12	Plasmid_Carrier	11	0.244
1360	pCF12_AZI	AZI	4	pCF12	Plasmid_Carrier	11	0.244
1370	pCF12_AZI	AZI	4	pCF12	Plasmid_Carrier	11	0.243
1380	pCF12_AZI	AZI	4	pCF12	Plasmid_Carrier	11	0.243
1390	pCF12_AZI	AZI	4	pCF12	Plasmid_Carrier	11	0.242
1400	pCF12_AZI	AZI	4	pCF12	Plasmid_Carrier	11	0.242
1410	pCF12_AZI	AZI	4	pCF12	Plasmid_Carrier	11	0.241
1420	pCF12_AZI	AZI	4	pCF12	Plasmid_Carrier	11	0.241
1430	pCF12_AZI	AZI	4	pCF12	Plasmid_Carrier	11	0.24
1440	pCF12_AZI	AZI	4	pCF12	Plasmid_Carrier	11	0.24
0	pCF12_AZI	AZI	4	pCF12	Plasmid_Carrier	12	0.095
10	pCF12_AZI	AZI	4	pCF12	Plasmid_Carrier	12	0.093
20	pCF12_AZI	AZI	4	pCF12	Plasmid_Carrier	12	0.093
30	pCF12_AZI	AZI	4	pCF12	Plasmid_Carrier	12	0.093
40	pCF12_AZI	AZI	4	pCF12	Plasmid_Carrier	12	0.094
50	pCF12_AZI	AZI	4	pCF12	Plasmid_Carrier	12	0.095
60	pCF12_AZI	AZI	4	pCF12	Plasmid_Carrier	12	0.095
70	pCF12_AZI	AZI	4	pCF12	Plasmid_Carrier	12	0.097
80	pCF12_AZI	AZI	4	pCF12	Plasmid_Carrier	12	0.099
90	pCF12_AZI	AZI	4	pCF12	Plasmid_Carrier	12	0.102
100	pCF12_AZI	AZI	4	pCF12	Plasmid_Carrier	12	0.105
110	pCF12_AZI	AZI	4	pCF12	Plasmid_Carrier	12	0.11
120	pCF12_AZI	AZI	4	pCF12	Plasmid_Carrier	12	0.116
130	pCF12_AZI	AZI	4	pCF12	Plasmid_Carrier	12	0.124
140	pCF12_AZI	AZI	4	pCF12	Plasmid_Carrier	12	0.133
150	pCF12_AZI	AZI	4	pCF12	Plasmid_Carrier	12	0.141
160	pCF12_AZI	AZI	4	pCF12	Plasmid_Carrier	12	0.15
170	pCF12_AZI	AZI	4	pCF12	Plasmid_Carrier	12	0.158
180	pCF12_AZI	AZI	4	pCF12	Plasmid_Carrier	12	0.166
190	pCF12_AZI	AZI	4	pCF12	Plasmid_Carrier	12	0.172
200	pCF12_AZI	AZI	4	pCF12	Plasmid_Carrier	12	0.178
210	pCF12_AZI	AZI	4	pCF12	Plasmid_Carrier	12	0.183
220	pCF12_AZI	AZI	4	pCF12	Plasmid_Carrier	12	0.188
230	pCF12_AZI	AZI	4	pCF12	Plasmid_Carrier	12	0.195
240	pCF12_AZI	AZI	4	pCF12	Plasmid_Carrier	12	0.2
250	pCF12_AZI	AZI	4	pCF12	Plasmid_Carrier	12	0.205
260	pCF12_AZI	AZI	4	pCF12	Plasmid_Carrier	12	0.21
270	pCF12_AZI	AZI	4	pCF12	Plasmid_Carrier	12	0.215
280	pCF12_AZI	AZI	4	pCF12	Plasmid_Carrier	12	0.22
290	pCF12_AZI	AZI	4	pCF12	Plasmid_Carrier	12	0.225
300	pCF12_AZI	AZI	4	pCF12	Plasmid_Carrier	12	0.23
310	pCF12_AZI	AZI	4	pCF12	Plasmid_Carrier	12	0.234
320	pCF12_AZI	AZI	4	pCF12	Plasmid_Carrier	12	0.236
330	pCF12_AZI	AZI	4	pCF12	Plasmid_Carrier	12	0.24
340	pCF12_AZI	AZI	4	pCF12	Plasmid_Carrier	12	0.245
350	pCF12_AZI	AZI	4	pCF12	Plasmid_Carrier	12	0.246
360	pCF12_AZI	AZI	4	pCF12	Plasmid_Carrier	12	0.251
370	pCF12_AZI	AZI	4	pCF12	Plasmid_Carrier	12	0.254
380	pCF12_AZI	AZI	4	pCF12	Plasmid_Carrier	12	0.253
390	pCF12_AZI	AZI	4	pCF12	Plasmid_Carrier	12	0.258
400	pCF12_AZI	AZI	4	pCF12	Plasmid_Carrier	12	0.259
410	pCF12_AZI	AZI	4	pCF12	Plasmid_Carrier	12	0.261
420	pCF12_AZI	AZI	4	pCF12	Plasmid_Carrier	12	0.262
430	pCF12_AZI	AZI	4	pCF12	Plasmid_Carrier	12	0.265
440	pCF12_AZI	AZI	4	pCF12	Plasmid_Carrier	12	0.269
450	pCF12_AZI	AZI	4	pCF12	Plasmid_Carrier	12	0.269
460	pCF12_AZI	AZI	4	pCF12	Plasmid_Carrier	12	0.269
470	pCF12_AZI	AZI	4	pCF12	Plasmid_Carrier	12	0.273
480	pCF12_AZI	AZI	4	pCF12	Plasmid_Carrier	12	0.275
490	pCF12_AZI	AZI	4	pCF12	Plasmid_Carrier	12	0.277
500	pCF12_AZI	AZI	4	pCF12	Plasmid_Carrier	12	0.279
510	pCF12_AZI	AZI	4	pCF12	Plasmid_Carrier	12	0.281
520	pCF12_AZI	AZI	4	pCF12	Plasmid_Carrier	12	0.282
530	pCF12_AZI	AZI	4	pCF12	Plasmid_Carrier	12	0.284
540	pCF12_AZI	AZI	4	pCF12	Plasmid_Carrier	12	0.286
550	pCF12_AZI	AZI	4	pCF12	Plasmid_Carrier	12	0.288
560	pCF12_AZI	AZI	4	pCF12	Plasmid_Carrier	12	0.289
570	pCF12_AZI	AZI	4	pCF12	Plasmid_Carrier	12	0.289
580	pCF12_AZI	AZI	4	pCF12	Plasmid_Carrier	12	0.291
590	pCF12_AZI	AZI	4	pCF12	Plasmid_Carrier	12	0.293
600	pCF12_AZI	AZI	4	pCF12	Plasmid_Carrier	12	0.294
610	pCF12_AZI	AZI	4	pCF12	Plasmid_Carrier	12	0.296
620	pCF12_AZI	AZI	4	pCF12	Plasmid_Carrier	12	0.297
630	pCF12_AZI	AZI	4	pCF12	Plasmid_Carrier	12	0.299
640	pCF12_AZI	AZI	4	pCF12	Plasmid_Carrier	12	0.302
650	pCF12_AZI	AZI	4	pCF12	Plasmid_Carrier	12	0.301
660	pCF12_AZI	AZI	4	pCF12	Plasmid_Carrier	12	0.303
670	pCF12_AZI	AZI	4	pCF12	Plasmid_Carrier	12	0.304
680	pCF12_AZI	AZI	4	pCF12	Plasmid_Carrier	12	0.306
690	pCF12_AZI	AZI	4	pCF12	Plasmid_Carrier	12	0.308
700	pCF12_AZI	AZI	4	pCF12	Plasmid_Carrier	12	0.308
710	pCF12_AZI	AZI	4	pCF12	Plasmid_Carrier	12	0.31
720	pCF12_AZI	AZI	4	pCF12	Plasmid_Carrier	12	0.311
730	pCF12_AZI	AZI	4	pCF12	Plasmid_Carrier	12	0.312
740	pCF12_AZI	AZI	4	pCF12	Plasmid_Carrier	12	0.313
750	pCF12_AZI	AZI	4	pCF12	Plasmid_Carrier	12	0.314
760	pCF12_AZI	AZI	4	pCF12	Plasmid_Carrier	12	0.315
770	pCF12_AZI	AZI	4	pCF12	Plasmid_Carrier	12	0.316
780	pCF12_AZI	AZI	4	pCF12	Plasmid_Carrier	12	0.317
790	pCF12_AZI	AZI	4	pCF12	Plasmid_Carrier	12	0.318
800	pCF12_AZI	AZI	4	pCF12	Plasmid_Carrier	12	0.318
810	pCF12_AZI	AZI	4	pCF12	Plasmid_Carrier	12	0.318
820	pCF12_AZI	AZI	4	pCF12	Plasmid_Carrier	12	0.318
830	pCF12_AZI	AZI	4	pCF12	Plasmid_Carrier	12	0.318
840	pCF12_AZI	AZI	4	pCF12	Plasmid_Carrier	12	0.319
850	pCF12_AZI	AZI	4	pCF12	Plasmid_Carrier	12	0.319
860	pCF12_AZI	AZI	4	pCF12	Plasmid_Carrier	12	0.319
870	pCF12_AZI	AZI	4	pCF12	Plasmid_Carrier	12	0.319
880	pCF12_AZI	AZI	4	pCF12	Plasmid_Carrier	12	0.319
890	pCF12_AZI	AZI	4	pCF12	Plasmid_Carrier	12	0.319
900	pCF12_AZI	AZI	4	pCF12	Plasmid_Carrier	12	0.319
910	pCF12_AZI	AZI	4	pCF12	Plasmid_Carrier	12	0.319
920	pCF12_AZI	AZI	4	pCF12	Plasmid_Carrier	12	0.319
930	pCF12_AZI	AZI	4	pCF12	Plasmid_Carrier	12	0.319
940	pCF12_AZI	AZI	4	pCF12	Plasmid_Carrier	12	0.318
950	pCF12_AZI	AZI	4	pCF12	Plasmid_Carrier	12	0.319
960	pCF12_AZI	AZI	4	pCF12	Plasmid_Carrier	12	0.318
970	pCF12_AZI	AZI	4	pCF12	Plasmid_Carrier	12	0.317
980	pCF12_AZI	AZI	4	pCF12	Plasmid_Carrier	12	0.318
990	pCF12_AZI	AZI	4	pCF12	Plasmid_Carrier	12	0.317
1000	pCF12_AZI	AZI	4	pCF12	Plasmid_Carrier	12	0.317
1010	pCF12_AZI	AZI	4	pCF12	Plasmid_Carrier	12	0.316
1020	pCF12_AZI	AZI	4	pCF12	Plasmid_Carrier	12	0.316
1030	pCF12_AZI	AZI	4	pCF12	Plasmid_Carrier	12	0.315
1040	pCF12_AZI	AZI	4	pCF12	Plasmid_Carrier	12	0.315
1050	pCF12_AZI	AZI	4	pCF12	Plasmid_Carrier	12	0.314
1060	pCF12_AZI	AZI	4	pCF12	Plasmid_Carrier	12	0.314
1070	pCF12_AZI	AZI	4	pCF12	Plasmid_Carrier	12	0.313
1080	pCF12_AZI	AZI	4	pCF12	Plasmid_Carrier	12	0.312
1090	pCF12_AZI	AZI	4	pCF12	Plasmid_Carrier	12	0.311
1100	pCF12_AZI	AZI	4	pCF12	Plasmid_Carrier	12	0.311
1110	pCF12_AZI	AZI	4	pCF12	Plasmid_Carrier	12	0.31
1120	pCF12_AZI	AZI	4	pCF12	Plasmid_Carrier	12	0.309
1130	pCF12_AZI	AZI	4	pCF12	Plasmid_Carrier	12	0.307
1140	pCF12_AZI	AZI	4	pCF12	Plasmid_Carrier	12	0.307
1150	pCF12_AZI	AZI	4	pCF12	Plasmid_Carrier	12	0.306
1160	pCF12_AZI	AZI	4	pCF12	Plasmid_Carrier	12	0.306
1170	pCF12_AZI	AZI	4	pCF12	Plasmid_Carrier	12	0.305
1180	pCF12_AZI	AZI	4	pCF12	Plasmid_Carrier	12	0.304
1190	pCF12_AZI	AZI	4	pCF12	Plasmid_Carrier	12	0.304
1200	pCF12_AZI	AZI	4	pCF12	Plasmid_Carrier	12	0.303
1210	pCF12_AZI	AZI	4	pCF12	Plasmid_Carrier	12	0.303
1220	pCF12_AZI	AZI	4	pCF12	Plasmid_Carrier	12	0.303
1230	pCF12_AZI	AZI	4	pCF12	Plasmid_Carrier	12	0.302
1240	pCF12_AZI	AZI	4	pCF12	Plasmid_Carrier	12	0.301
1250	pCF12_AZI	AZI	4	pCF12	Plasmid_Carrier	12	0.3
1260	pCF12_AZI	AZI	4	pCF12	Plasmid_Carrier	12	0.3
1270	pCF12_AZI	AZI	4	pCF12	Plasmid_Carrier	12	0.299
1280	pCF12_AZI	AZI	4	pCF12	Plasmid_Carrier	12	0.298
1290	pCF12_AZI	AZI	4	pCF12	Plasmid_Carrier	12	0.298
1300	pCF12_AZI	AZI	4	pCF12	Plasmid_Carrier	12	0.297
1310	pCF12_AZI	AZI	4	pCF12	Plasmid_Carrier	12	0.296
1320	pCF12_AZI	AZI	4	pCF12	Plasmid_Carrier	12	0.295
1330	pCF12_AZI	AZI	4	pCF12	Plasmid_Carrier	12	0.295
1340	pCF12_AZI	AZI	4	pCF12	Plasmid_Carrier	12	0.294
1350	pCF12_AZI	AZI	4	pCF12	Plasmid_Carrier	12	0.293
1360	pCF12_AZI	AZI	4	pCF12	Plasmid_Carrier	12	0.292
1370	pCF12_AZI	AZI	4	pCF12	Plasmid_Carrier	12	0.291
1380	pCF12_AZI	AZI	4	pCF12	Plasmid_Carrier	12	0.29
1390	pCF12_AZI	AZI	4	pCF12	Plasmid_Carrier	12	0.29
1400	pCF12_AZI	AZI	4	pCF12	Plasmid_Carrier	12	0.289
1410	pCF12_AZI	AZI	4	pCF12	Plasmid_Carrier	12	0.288
1420	pCF12_AZI	AZI	4	pCF12	Plasmid_Carrier	12	0.287
1430	pCF12_AZI	AZI	4	pCF12	Plasmid_Carrier	12	0.287
1440	pCF12_AZI	AZI	4	pCF12	Plasmid_Carrier	12	0.286
0	pCF12_AZI	AZI	8	pCF12	Plasmid_Carrier	7	0.117
10	pCF12_AZI	AZI	8	pCF12	Plasmid_Carrier	7	0.094
20	pCF12_AZI	AZI	8	pCF12	Plasmid_Carrier	7	0.095
30	pCF12_AZI	AZI	8	pCF12	Plasmid_Carrier	7	0.095
40	pCF12_AZI	AZI	8	pCF12	Plasmid_Carrier	7	0.095
50	pCF12_AZI	AZI	8	pCF12	Plasmid_Carrier	7	0.096
60	pCF12_AZI	AZI	8	pCF12	Plasmid_Carrier	7	0.096
70	pCF12_AZI	AZI	8	pCF12	Plasmid_Carrier	7	0.097
80	pCF12_AZI	AZI	8	pCF12	Plasmid_Carrier	7	0.098
90	pCF12_AZI	AZI	8	pCF12	Plasmid_Carrier	7	0.1
100	pCF12_AZI	AZI	8	pCF12	Plasmid_Carrier	7	0.101
110	pCF12_AZI	AZI	8	pCF12	Plasmid_Carrier	7	0.104
120	pCF12_AZI	AZI	8	pCF12	Plasmid_Carrier	7	0.107
130	pCF12_AZI	AZI	8	pCF12	Plasmid_Carrier	7	0.111
140	pCF12_AZI	AZI	8	pCF12	Plasmid_Carrier	7	0.115
150	pCF12_AZI	AZI	8	pCF12	Plasmid_Carrier	7	0.12
160	pCF12_AZI	AZI	8	pCF12	Plasmid_Carrier	7	0.126
170	pCF12_AZI	AZI	8	pCF12	Plasmid_Carrier	7	0.131
180	pCF12_AZI	AZI	8	pCF12	Plasmid_Carrier	7	0.137
190	pCF12_AZI	AZI	8	pCF12	Plasmid_Carrier	7	0.142
200	pCF12_AZI	AZI	8	pCF12	Plasmid_Carrier	7	0.146
210	pCF12_AZI	AZI	8	pCF12	Plasmid_Carrier	7	0.151
220	pCF12_AZI	AZI	8	pCF12	Plasmid_Carrier	7	0.154
230	pCF12_AZI	AZI	8	pCF12	Plasmid_Carrier	7	0.156
240	pCF12_AZI	AZI	8	pCF12	Plasmid_Carrier	7	0.159
250	pCF12_AZI	AZI	8	pCF12	Plasmid_Carrier	7	0.161
260	pCF12_AZI	AZI	8	pCF12	Plasmid_Carrier	7	0.163
270	pCF12_AZI	AZI	8	pCF12	Plasmid_Carrier	7	0.165
280	pCF12_AZI	AZI	8	pCF12	Plasmid_Carrier	7	0.166
290	pCF12_AZI	AZI	8	pCF12	Plasmid_Carrier	7	0.167
300	pCF12_AZI	AZI	8	pCF12	Plasmid_Carrier	7	0.168
310	pCF12_AZI	AZI	8	pCF12	Plasmid_Carrier	7	0.169
320	pCF12_AZI	AZI	8	pCF12	Plasmid_Carrier	7	0.169
330	pCF12_AZI	AZI	8	pCF12	Plasmid_Carrier	7	0.168
340	pCF12_AZI	AZI	8	pCF12	Plasmid_Carrier	7	0.172
350	pCF12_AZI	AZI	8	pCF12	Plasmid_Carrier	7	0.173
360	pCF12_AZI	AZI	8	pCF12	Plasmid_Carrier	7	0.173
370	pCF12_AZI	AZI	8	pCF12	Plasmid_Carrier	7	0.173
380	pCF12_AZI	AZI	8	pCF12	Plasmid_Carrier	7	0.173
390	pCF12_AZI	AZI	8	pCF12	Plasmid_Carrier	7	0.174
400	pCF12_AZI	AZI	8	pCF12	Plasmid_Carrier	7	0.172
410	pCF12_AZI	AZI	8	pCF12	Plasmid_Carrier	7	0.172
420	pCF12_AZI	AZI	8	pCF12	Plasmid_Carrier	7	0.172
430	pCF12_AZI	AZI	8	pCF12	Plasmid_Carrier	7	0.169
440	pCF12_AZI	AZI	8	pCF12	Plasmid_Carrier	7	0.171
450	pCF12_AZI	AZI	8	pCF12	Plasmid_Carrier	7	0.17
460	pCF12_AZI	AZI	8	pCF12	Plasmid_Carrier	7	0.169
470	pCF12_AZI	AZI	8	pCF12	Plasmid_Carrier	7	0.167
480	pCF12_AZI	AZI	8	pCF12	Plasmid_Carrier	7	0.168
490	pCF12_AZI	AZI	8	pCF12	Plasmid_Carrier	7	0.167
500	pCF12_AZI	AZI	8	pCF12	Plasmid_Carrier	7	0.167
510	pCF12_AZI	AZI	8	pCF12	Plasmid_Carrier	7	0.168
520	pCF12_AZI	AZI	8	pCF12	Plasmid_Carrier	7	0.166
530	pCF12_AZI	AZI	8	pCF12	Plasmid_Carrier	7	0.166
540	pCF12_AZI	AZI	8	pCF12	Plasmid_Carrier	7	0.166
550	pCF12_AZI	AZI	8	pCF12	Plasmid_Carrier	7	0.166
560	pCF12_AZI	AZI	8	pCF12	Plasmid_Carrier	7	0.166
570	pCF12_AZI	AZI	8	pCF12	Plasmid_Carrier	7	0.166
580	pCF12_AZI	AZI	8	pCF12	Plasmid_Carrier	7	0.165
590	pCF12_AZI	AZI	8	pCF12	Plasmid_Carrier	7	0.166
600	pCF12_AZI	AZI	8	pCF12	Plasmid_Carrier	7	0.165
610	pCF12_AZI	AZI	8	pCF12	Plasmid_Carrier	7	0.165
620	pCF12_AZI	AZI	8	pCF12	Plasmid_Carrier	7	0.165
630	pCF12_AZI	AZI	8	pCF12	Plasmid_Carrier	7	0.165
640	pCF12_AZI	AZI	8	pCF12	Plasmid_Carrier	7	0.165
650	pCF12_AZI	AZI	8	pCF12	Plasmid_Carrier	7	0.165
660	pCF12_AZI	AZI	8	pCF12	Plasmid_Carrier	7	0.165
670	pCF12_AZI	AZI	8	pCF12	Plasmid_Carrier	7	0.165
680	pCF12_AZI	AZI	8	pCF12	Plasmid_Carrier	7	0.165
690	pCF12_AZI	AZI	8	pCF12	Plasmid_Carrier	7	0.165
700	pCF12_AZI	AZI	8	pCF12	Plasmid_Carrier	7	0.165
710	pCF12_AZI	AZI	8	pCF12	Plasmid_Carrier	7	0.165
720	pCF12_AZI	AZI	8	pCF12	Plasmid_Carrier	7	0.165
730	pCF12_AZI	AZI	8	pCF12	Plasmid_Carrier	7	0.165
740	pCF12_AZI	AZI	8	pCF12	Plasmid_Carrier	7	0.165
750	pCF12_AZI	AZI	8	pCF12	Plasmid_Carrier	7	0.165
760	pCF12_AZI	AZI	8	pCF12	Plasmid_Carrier	7	0.165
770	pCF12_AZI	AZI	8	pCF12	Plasmid_Carrier	7	0.165
780	pCF12_AZI	AZI	8	pCF12	Plasmid_Carrier	7	0.165
790	pCF12_AZI	AZI	8	pCF12	Plasmid_Carrier	7	0.165
800	pCF12_AZI	AZI	8	pCF12	Plasmid_Carrier	7	0.165
810	pCF12_AZI	AZI	8	pCF12	Plasmid_Carrier	7	0.165
820	pCF12_AZI	AZI	8	pCF12	Plasmid_Carrier	7	0.165
830	pCF12_AZI	AZI	8	pCF12	Plasmid_Carrier	7	0.165
840	pCF12_AZI	AZI	8	pCF12	Plasmid_Carrier	7	0.165
850	pCF12_AZI	AZI	8	pCF12	Plasmid_Carrier	7	0.165
860	pCF12_AZI	AZI	8	pCF12	Plasmid_Carrier	7	0.165
870	pCF12_AZI	AZI	8	pCF12	Plasmid_Carrier	7	0.165
880	pCF12_AZI	AZI	8	pCF12	Plasmid_Carrier	7	0.165
890	pCF12_AZI	AZI	8	pCF12	Plasmid_Carrier	7	0.165
900	pCF12_AZI	AZI	8	pCF12	Plasmid_Carrier	7	0.165
910	pCF12_AZI	AZI	8	pCF12	Plasmid_Carrier	7	0.165
920	pCF12_AZI	AZI	8	pCF12	Plasmid_Carrier	7	0.165
930	pCF12_AZI	AZI	8	pCF12	Plasmid_Carrier	7	0.165
940	pCF12_AZI	AZI	8	pCF12	Plasmid_Carrier	7	0.164
950	pCF12_AZI	AZI	8	pCF12	Plasmid_Carrier	7	0.165
960	pCF12_AZI	AZI	8	pCF12	Plasmid_Carrier	7	0.164
970	pCF12_AZI	AZI	8	pCF12	Plasmid_Carrier	7	0.164
980	pCF12_AZI	AZI	8	pCF12	Plasmid_Carrier	7	0.164
990	pCF12_AZI	AZI	8	pCF12	Plasmid_Carrier	7	0.164
1000	pCF12_AZI	AZI	8	pCF12	Plasmid_Carrier	7	0.164
1010	pCF12_AZI	AZI	8	pCF12	Plasmid_Carrier	7	0.164
1020	pCF12_AZI	AZI	8	pCF12	Plasmid_Carrier	7	0.164
1030	pCF12_AZI	AZI	8	pCF12	Plasmid_Carrier	7	0.164
1040	pCF12_AZI	AZI	8	pCF12	Plasmid_Carrier	7	0.164
1050	pCF12_AZI	AZI	8	pCF12	Plasmid_Carrier	7	0.164
1060	pCF12_AZI	AZI	8	pCF12	Plasmid_Carrier	7	0.164
1070	pCF12_AZI	AZI	8	pCF12	Plasmid_Carrier	7	0.164
1080	pCF12_AZI	AZI	8	pCF12	Plasmid_Carrier	7	0.163
1090	pCF12_AZI	AZI	8	pCF12	Plasmid_Carrier	7	0.163
1100	pCF12_AZI	AZI	8	pCF12	Plasmid_Carrier	7	0.163
1110	pCF12_AZI	AZI	8	pCF12	Plasmid_Carrier	7	0.163
1120	pCF12_AZI	AZI	8	pCF12	Plasmid_Carrier	7	0.163
1130	pCF12_AZI	AZI	8	pCF12	Plasmid_Carrier	7	0.163
1140	pCF12_AZI	AZI	8	pCF12	Plasmid_Carrier	7	0.163
1150	pCF12_AZI	AZI	8	pCF12	Plasmid_Carrier	7	0.163
1160	pCF12_AZI	AZI	8	pCF12	Plasmid_Carrier	7	0.163
1170	pCF12_AZI	AZI	8	pCF12	Plasmid_Carrier	7	0.163
1180	pCF12_AZI	AZI	8	pCF12	Plasmid_Carrier	7	0.162
1190	pCF12_AZI	AZI	8	pCF12	Plasmid_Carrier	7	0.162
1200	pCF12_AZI	AZI	8	pCF12	Plasmid_Carrier	7	0.162
1210	pCF12_AZI	AZI	8	pCF12	Plasmid_Carrier	7	0.162
1220	pCF12_AZI	AZI	8	pCF12	Plasmid_Carrier	7	0.162
1230	pCF12_AZI	AZI	8	pCF12	Plasmid_Carrier	7	0.162
1240	pCF12_AZI	AZI	8	pCF12	Plasmid_Carrier	7	0.162
1250	pCF12_AZI	AZI	8	pCF12	Plasmid_Carrier	7	0.162
1260	pCF12_AZI	AZI	8	pCF12	Plasmid_Carrier	7	0.162
1270	pCF12_AZI	AZI	8	pCF12	Plasmid_Carrier	7	0.162
1280	pCF12_AZI	AZI	8	pCF12	Plasmid_Carrier	7	0.162
1290	pCF12_AZI	AZI	8	pCF12	Plasmid_Carrier	7	0.162
1300	pCF12_AZI	AZI	8	pCF12	Plasmid_Carrier	7	0.161
1310	pCF12_AZI	AZI	8	pCF12	Plasmid_Carrier	7	0.161
1320	pCF12_AZI	AZI	8	pCF12	Plasmid_Carrier	7	0.161
1330	pCF12_AZI	AZI	8	pCF12	Plasmid_Carrier	7	0.161
1340	pCF12_AZI	AZI	8	pCF12	Plasmid_Carrier	7	0.161
1350	pCF12_AZI	AZI	8	pCF12	Plasmid_Carrier	7	0.161
1360	pCF12_AZI	AZI	8	pCF12	Plasmid_Carrier	7	0.161
1370	pCF12_AZI	AZI	8	pCF12	Plasmid_Carrier	7	0.161
1380	pCF12_AZI	AZI	8	pCF12	Plasmid_Carrier	7	0.161
1390	pCF12_AZI	AZI	8	pCF12	Plasmid_Carrier	7	0.161
1400	pCF12_AZI	AZI	8	pCF12	Plasmid_Carrier	7	0.161
1410	pCF12_AZI	AZI	8	pCF12	Plasmid_Carrier	7	0.161
1420	pCF12_AZI	AZI	8	pCF12	Plasmid_Carrier	7	0.161
1430	pCF12_AZI	AZI	8	pCF12	Plasmid_Carrier	7	0.16
1440	pCF12_AZI	AZI	8	pCF12	Plasmid_Carrier	7	0.16
0	pCF12_AZI	AZI	8	pCF12	Plasmid_Carrier	8	0.11
10	pCF12_AZI	AZI	8	pCF12	Plasmid_Carrier	8	0.096
20	pCF12_AZI	AZI	8	pCF12	Plasmid_Carrier	8	0.095
30	pCF12_AZI	AZI	8	pCF12	Plasmid_Carrier	8	0.095
40	pCF12_AZI	AZI	8	pCF12	Plasmid_Carrier	8	0.096
50	pCF12_AZI	AZI	8	pCF12	Plasmid_Carrier	8	0.098
60	pCF12_AZI	AZI	8	pCF12	Plasmid_Carrier	8	0.099
70	pCF12_AZI	AZI	8	pCF12	Plasmid_Carrier	8	0.101
80	pCF12_AZI	AZI	8	pCF12	Plasmid_Carrier	8	0.103
90	pCF12_AZI	AZI	8	pCF12	Plasmid_Carrier	8	0.106
100	pCF12_AZI	AZI	8	pCF12	Plasmid_Carrier	8	0.11
110	pCF12_AZI	AZI	8	pCF12	Plasmid_Carrier	8	0.116
120	pCF12_AZI	AZI	8	pCF12	Plasmid_Carrier	8	0.121
130	pCF12_AZI	AZI	8	pCF12	Plasmid_Carrier	8	0.127
140	pCF12_AZI	AZI	8	pCF12	Plasmid_Carrier	8	0.135
150	pCF12_AZI	AZI	8	pCF12	Plasmid_Carrier	8	0.143
160	pCF12_AZI	AZI	8	pCF12	Plasmid_Carrier	8	0.15
170	pCF12_AZI	AZI	8	pCF12	Plasmid_Carrier	8	0.156
180	pCF12_AZI	AZI	8	pCF12	Plasmid_Carrier	8	0.161
190	pCF12_AZI	AZI	8	pCF12	Plasmid_Carrier	8	0.165
200	pCF12_AZI	AZI	8	pCF12	Plasmid_Carrier	8	0.168
210	pCF12_AZI	AZI	8	pCF12	Plasmid_Carrier	8	0.172
220	pCF12_AZI	AZI	8	pCF12	Plasmid_Carrier	8	0.176
230	pCF12_AZI	AZI	8	pCF12	Plasmid_Carrier	8	0.174
240	pCF12_AZI	AZI	8	pCF12	Plasmid_Carrier	8	0.178
250	pCF12_AZI	AZI	8	pCF12	Plasmid_Carrier	8	0.179
260	pCF12_AZI	AZI	8	pCF12	Plasmid_Carrier	8	0.18
270	pCF12_AZI	AZI	8	pCF12	Plasmid_Carrier	8	0.181
280	pCF12_AZI	AZI	8	pCF12	Plasmid_Carrier	8	0.182
290	pCF12_AZI	AZI	8	pCF12	Plasmid_Carrier	8	0.182
300	pCF12_AZI	AZI	8	pCF12	Plasmid_Carrier	8	0.183
310	pCF12_AZI	AZI	8	pCF12	Plasmid_Carrier	8	0.183
320	pCF12_AZI	AZI	8	pCF12	Plasmid_Carrier	8	0.182
330	pCF12_AZI	AZI	8	pCF12	Plasmid_Carrier	8	0.183
340	pCF12_AZI	AZI	8	pCF12	Plasmid_Carrier	8	0.184
350	pCF12_AZI	AZI	8	pCF12	Plasmid_Carrier	8	0.184
360	pCF12_AZI	AZI	8	pCF12	Plasmid_Carrier	8	0.184
370	pCF12_AZI	AZI	8	pCF12	Plasmid_Carrier	8	0.183
380	pCF12_AZI	AZI	8	pCF12	Plasmid_Carrier	8	0.185
390	pCF12_AZI	AZI	8	pCF12	Plasmid_Carrier	8	0.185
400	pCF12_AZI	AZI	8	pCF12	Plasmid_Carrier	8	0.183
410	pCF12_AZI	AZI	8	pCF12	Plasmid_Carrier	8	0.184
420	pCF12_AZI	AZI	8	pCF12	Plasmid_Carrier	8	0.183
430	pCF12_AZI	AZI	8	pCF12	Plasmid_Carrier	8	0.183
440	pCF12_AZI	AZI	8	pCF12	Plasmid_Carrier	8	0.182
450	pCF12_AZI	AZI	8	pCF12	Plasmid_Carrier	8	0.182
460	pCF12_AZI	AZI	8	pCF12	Plasmid_Carrier	8	0.181
470	pCF12_AZI	AZI	8	pCF12	Plasmid_Carrier	8	0.181
480	pCF12_AZI	AZI	8	pCF12	Plasmid_Carrier	8	0.182
490	pCF12_AZI	AZI	8	pCF12	Plasmid_Carrier	8	0.181
500	pCF12_AZI	AZI	8	pCF12	Plasmid_Carrier	8	0.18
510	pCF12_AZI	AZI	8	pCF12	Plasmid_Carrier	8	0.18
520	pCF12_AZI	AZI	8	pCF12	Plasmid_Carrier	8	0.18
530	pCF12_AZI	AZI	8	pCF12	Plasmid_Carrier	8	0.178
540	pCF12_AZI	AZI	8	pCF12	Plasmid_Carrier	8	0.178
550	pCF12_AZI	AZI	8	pCF12	Plasmid_Carrier	8	0.178
560	pCF12_AZI	AZI	8	pCF12	Plasmid_Carrier	8	0.178
570	pCF12_AZI	AZI	8	pCF12	Plasmid_Carrier	8	0.178
580	pCF12_AZI	AZI	8	pCF12	Plasmid_Carrier	8	0.178
590	pCF12_AZI	AZI	8	pCF12	Plasmid_Carrier	8	0.178
600	pCF12_AZI	AZI	8	pCF12	Plasmid_Carrier	8	0.178
610	pCF12_AZI	AZI	8	pCF12	Plasmid_Carrier	8	0.177
620	pCF12_AZI	AZI	8	pCF12	Plasmid_Carrier	8	0.177
630	pCF12_AZI	AZI	8	pCF12	Plasmid_Carrier	8	0.177
640	pCF12_AZI	AZI	8	pCF12	Plasmid_Carrier	8	0.177
650	pCF12_AZI	AZI	8	pCF12	Plasmid_Carrier	8	0.177
660	pCF12_AZI	AZI	8	pCF12	Plasmid_Carrier	8	0.177
670	pCF12_AZI	AZI	8	pCF12	Plasmid_Carrier	8	0.177
680	pCF12_AZI	AZI	8	pCF12	Plasmid_Carrier	8	0.177
690	pCF12_AZI	AZI	8	pCF12	Plasmid_Carrier	8	0.177
700	pCF12_AZI	AZI	8	pCF12	Plasmid_Carrier	8	0.177
710	pCF12_AZI	AZI	8	pCF12	Plasmid_Carrier	8	0.177
720	pCF12_AZI	AZI	8	pCF12	Plasmid_Carrier	8	0.177
730	pCF12_AZI	AZI	8	pCF12	Plasmid_Carrier	8	0.177
740	pCF12_AZI	AZI	8	pCF12	Plasmid_Carrier	8	0.177
750	pCF12_AZI	AZI	8	pCF12	Plasmid_Carrier	8	0.177
760	pCF12_AZI	AZI	8	pCF12	Plasmid_Carrier	8	0.177
770	pCF12_AZI	AZI	8	pCF12	Plasmid_Carrier	8	0.177
780	pCF12_AZI	AZI	8	pCF12	Plasmid_Carrier	8	0.177
790	pCF12_AZI	AZI	8	pCF12	Plasmid_Carrier	8	0.177
800	pCF12_AZI	AZI	8	pCF12	Plasmid_Carrier	8	0.177
810	pCF12_AZI	AZI	8	pCF12	Plasmid_Carrier	8	0.178
820	pCF12_AZI	AZI	8	pCF12	Plasmid_Carrier	8	0.178
830	pCF12_AZI	AZI	8	pCF12	Plasmid_Carrier	8	0.178
840	pCF12_AZI	AZI	8	pCF12	Plasmid_Carrier	8	0.177
850	pCF12_AZI	AZI	8	pCF12	Plasmid_Carrier	8	0.178
860	pCF12_AZI	AZI	8	pCF12	Plasmid_Carrier	8	0.178
870	pCF12_AZI	AZI	8	pCF12	Plasmid_Carrier	8	0.177
880	pCF12_AZI	AZI	8	pCF12	Plasmid_Carrier	8	0.178
890	pCF12_AZI	AZI	8	pCF12	Plasmid_Carrier	8	0.178
900	pCF12_AZI	AZI	8	pCF12	Plasmid_Carrier	8	0.178
910	pCF12_AZI	AZI	8	pCF12	Plasmid_Carrier	8	0.178
920	pCF12_AZI	AZI	8	pCF12	Plasmid_Carrier	8	0.178
930	pCF12_AZI	AZI	8	pCF12	Plasmid_Carrier	8	0.178
940	pCF12_AZI	AZI	8	pCF12	Plasmid_Carrier	8	0.178
950	pCF12_AZI	AZI	8	pCF12	Plasmid_Carrier	8	0.178
960	pCF12_AZI	AZI	8	pCF12	Plasmid_Carrier	8	0.178
970	pCF12_AZI	AZI	8	pCF12	Plasmid_Carrier	8	0.178
980	pCF12_AZI	AZI	8	pCF12	Plasmid_Carrier	8	0.178
990	pCF12_AZI	AZI	8	pCF12	Plasmid_Carrier	8	0.178
1000	pCF12_AZI	AZI	8	pCF12	Plasmid_Carrier	8	0.178
1010	pCF12_AZI	AZI	8	pCF12	Plasmid_Carrier	8	0.178
1020	pCF12_AZI	AZI	8	pCF12	Plasmid_Carrier	8	0.178
1030	pCF12_AZI	AZI	8	pCF12	Plasmid_Carrier	8	0.178
1040	pCF12_AZI	AZI	8	pCF12	Plasmid_Carrier	8	0.178
1050	pCF12_AZI	AZI	8	pCF12	Plasmid_Carrier	8	0.178
1060	pCF12_AZI	AZI	8	pCF12	Plasmid_Carrier	8	0.178
1070	pCF12_AZI	AZI	8	pCF12	Plasmid_Carrier	8	0.178
1080	pCF12_AZI	AZI	8	pCF12	Plasmid_Carrier	8	0.178
1090	pCF12_AZI	AZI	8	pCF12	Plasmid_Carrier	8	0.178
1100	pCF12_AZI	AZI	8	pCF12	Plasmid_Carrier	8	0.178
1110	pCF12_AZI	AZI	8	pCF12	Plasmid_Carrier	8	0.178
1120	pCF12_AZI	AZI	8	pCF12	Plasmid_Carrier	8	0.178
[truncated: 67,680 more rows]

## Sheet: Figure 1D
Inhibition halos measured in mm
MG1655					MG/pCF12		MG/pOXA-48		MG/pKAZ3		MG/pKA2Q
AZI	COL	GM	KM	TET	AZI	KM	AZI	COL	GM	KM	TET
18.645	14.423	17.784	20.251	25.632	24.638	20.62	26.727	16.718	17.572	20.398	26.84
16.533	8.774	16.323	20.124	26.997	24.042	20.65	29.175	16.509	18.157	19.648	24.642
18.191	11.932	16.619	19.972	25.969	25.426	20.013	23.684	18.079	15.639	18.061	25.445
22.01	16.196	15.876	20.329	24.639	22.513	20.835	30.855	17.505	18.147	18.983	24.783
23.414	16.695	18.264	18.199	24.949	19.58	20.846	28.691	16.412	18.098	19.334	23.786
21.519	17.314	17.348	17.664	20.294	25.142	20.48	25.318	18.162	18.981	21.809	25.776
19.233	15.134	18.537	19.053	24.946	27.765	22.409	27.582	20.408	18.122	19.018	26.026
19.35	15.224	17.493	19.674	22.71	27.633	21.499	30.579	18.137	16.743	20.536	25.559
15.111	15.176	15.055	20.3	23.651	25.662	22.612	30.992	10.793	17.069	19.22	26.973
21.792	8.338	17.98	19.946	23.951	27.386	22.44	27.14	16.942	17.194	23.5	26.459
22.795	13.589	17.645	20.164	21.353	25.057	21.415	31.049	17.884	16.346	20.132	25.807
22.99	16.587	18.154	19.708	14.042	24.924	20.953	28.088		18.284	21.864	25.004
17.74			20.835			22.363			19.432	20.025
19.618			19.502			20.422			17.672	21.171
23.432										20.124
26.342
24.647
25.561
24.164
