# Supplementary material for: Collateral sensitivity associated with antibiotic resistance plasmids
Source: eLife. 2021 Jan 20;10:e65130. doi: 10.7554/eLife.65130 (PMC7837676; doi:10.7554/eLife.65130)
Supplement: Figure 2—source data 1. [file elife-65130-fig2-data1.xlsx]

## Sheet: Figure 2B
Inhibition halos measured in mm
Ec02		Tc02		Ec03		Tc03		Ec04		Tc04		Ec06		Tc06		Ec10		Tc10		Ec18		Tc18		Ec20		Tc20		Ec21		Tc21		Ec25		Tc25
AZI	COL	AZI	COL	AZI	COL	AZI	COL	AZI	COL	AZI	COL	AZI	COL	AZI	COL	AZI	COL	AZI	COL	AZI	COL	AZI	COL	AZI	COL	AZI	COL	AZI	COL	AZI	COL	AZI	COL	AZI	COL
16.848	17.085	20.24	15.352	7.365	14.842	15.866	14.695	18.126	14.603	17.371	12.349	9.249	13.591	16.125	12.395	7.126	15.598	17.398	13.504	13.934	14.869	14.44	14.838	16.816	15.038	16.315	14.722	14.426	9.82	12.872	15.003	11.105	15.322	15.209	15.192
18.024	16.235	21.09	17.217	12.583	14.098	18.302	11.996	16.454	13.343	20.482	14.413	10.274	13.408	19.184	13.474	16.899	14.093	17.121	14.973	13.854	15.067	15.561	16.23	16.219	13.534	16.365	14.223	13.421	15.035	13.564	10.187	14.177	14.699	14	14.445
15.23	16.36	20.062	14.208	13.943	12.855	16.89	9.375	19.178	14.76	20.747	10.54	15.122	12.316	18.286	12.692	8.429	13.314	17.239	16.254	8.324	16.13	14.788	14.601	14.692	13.409	15.905	14.89	12.268	15.345	15.317	11.842	8.617	14.065	14.496	15.256
17.797	15.696	20.317	14.293	7.056	12.264	17.077	14.571	15	14.809	19.601	14.249	16.033	14.874	16.777	12.39	16.118	13.956	17.172	14.298	7.124	15.114	16.01	15.726	15.89	14.662	16.328	11.535	12.074	14.047	17.351	14.91	14.993	14.695	13.248	15.857
18.341	16.323	21.749	16.322	7.549	16.555	13.072	14.933	15.974	13.777	20.462	16.975	14.116	14.31	18.118	16.2	16.001	13.369	9.456	15.182	16.14	13.631	16.002	17.273	16.073	13.187	17.36	14.688	12.983	14.633	17.023	14.727	10.891		12.664	15.031
17.896	15.716	19.451	15.945	14.234	14.37	17.122	14.436	17.731	14.758	18.966	15.065	16.897		15.304	13.885	16.399	14.393	17.412	15.336	14.984	14.211	16.815	15.719	15.569	14.035	16.971	15.564	15.485	13.921	15.129	14.715	11.893		14.536	15.402
18.139	16.3	19.601	11.86		12.001	17.65	14.237	19.211	15.191	18.911	14.632	15.398		17.2		16.342	14.027	9.71	15.195	14.198	13.89	15.568	14.787	15.983	14.704	18.018		13.655		15.809		12.198		12.641	16.352
16.995	16.806	17.787	15.085		15.651	16.665		14.415	14.527	16.867	14.681	15.954		16.821		8.297	14.18		15.793	12.412	14.376		15.966	16.228	12.778	16.685		13.709		14.568		10.124		13.492	14.869
17.8	14.7	19.105	16.495		9.769	16.938		15.797	15.821	20.107		16.972		17.621		7.498	13.226		14.786		14.754		16.279	16.281	14.253	16.622		13.706		14.156		11.184		11.128
15.196		17.827						17.876	15.007	19.943		16.638		17.432		16.824			14.747		14.557		15.076			16.945						12.154		13.516
