# Supplementary material for: Collateral sensitivity associated with antibiotic resistance plasmids
Source: eLife. 2021 Jan 20;10:e65130. doi: 10.7554/eLife.65130 (PMC7837676; doi:10.7554/eLife.65130)
Supplement: Figure 3—source data 1. [file elife-65130-fig3-data1.xlsx]

## Sheet: Sheet1
Day	Replica	Strain	Plasmid	Antibiotic	OD	Growth_Inhibition	Time
Day3	1_5	MG1655	Empty	AZI8/AZI8	0	TRUE	3
Day3	1_6	MG1655	Empty	AZI8/AZI8	0	TRUE	3
Day3	1_7	MG1655	Empty	AZI8/AZI8	0	TRUE	3
Day3	1_8	MG1655	Empty	AZI8/AZI8	0	TRUE	3
Day3	2_3	MG1655	Empty	AZI8/AZI8	0	TRUE	3
Day3	2_4	MG1655	Empty	AZI8/AZI8	0	TRUE	3
Day3	2_5	MG1655	Empty	AZI8/AZI8	0	TRUE	3
Day3	2_6	MG1655	Empty	AZI8/AZI8	0	TRUE	3
Day3	2_7	MG1655	Empty	AZI8/AZI8	0	TRUE	3
Day3	2_8	MG1655	Empty	AZI8/AZI8	0	TRUE	3
Day3	3_4	MG1655	Empty	AZI8/AZI8	0	TRUE	3
Day3	3_5	MG1655	Empty	AZI8/AZI8	0	TRUE	3
Day3	3_6	MG1655	Empty	AZI8/AZI8	0	TRUE	3
Day3	3_7	MG1655	Empty	AZI8/AZI8	0	TRUE	3
Day3	3_8	MG1655	Empty	AZI8/AZI8	0	TRUE	3
Day3	4_4	MG1655	Empty	AZI8/AZI8	0	TRUE	3
Day3	4_5	MG1655	Empty	AZI8/AZI8	0	TRUE	3
Day3	4_6	MG1655	Empty	AZI8/AZI8	0	TRUE	3
Day3	4_7	MG1655	Empty	AZI8/AZI8	0	TRUE	3
Day3	4_8	MG1655	Empty	AZI8/AZI8	0	TRUE	3
Day3	5_4	MG1655	Empty	AZI8/AZI8	0	TRUE	3
Day3	5_5	MG1655	Empty	AZI8/AZI8	0	TRUE	3
Day3	5_6	MG1655	Empty	AZI8/AZI8	0	TRUE	3
Day3	5_7	MG1655	Empty	AZI8/AZI8	0	TRUE	3
Day3	5_8	MG1655	Empty	AZI8/AZI8	0	TRUE	3
Day3	6_4	MG1655	Empty	AZI8/AZI8	0	TRUE	3
Day3	6_5	MG1655	Empty	AZI8/AZI8	0	TRUE	3
Day3	6_6	MG1655	Empty	AZI8/AZI8	0	TRUE	3
Day3	6_7	MG1655	Empty	AZI8/AZI8	0	TRUE	3
Day3	6_8	MG1655	Empty	AZI8/AZI8	0	TRUE	3
Day3	1_1	MG1655	pOXA-48	AZI8/AZI8	0	TRUE	3
Day3	1_2	MG1655	pOXA-48	AZI8/AZI8	0	TRUE	3
Day3	1_3	MG1655	pOXA-48	AZI8/AZI8	0	TRUE	3
Day3	1_4	MG1655	pOXA-48	AZI8/AZI8	0	TRUE	3
Day3	1_5	MG1655	pOXA-48	AZI8/AZI8	0	TRUE	3
Day3	1_6	MG1655	pOXA-48	AZI8/AZI8	0	TRUE	3
Day3	1_7	MG1655	pOXA-48	AZI8/AZI8	0	TRUE	3
Day3	1_8	MG1655	pOXA-48	AZI8/AZI8	0	TRUE	3
Day3	2_1	MG1655	pOXA-48	AZI8/AZI8	0	TRUE	3
Day3	2_2	MG1655	pOXA-48	AZI8/AZI8	0	TRUE	3
Day3	2_3	MG1655	pOXA-48	AZI8/AZI8	0	TRUE	3
Day3	2_4	MG1655	pOXA-48	AZI8/AZI8	0	TRUE	3
Day3	2_5	MG1655	pOXA-48	AZI8/AZI8	0	TRUE	3
Day3	2_6	MG1655	pOXA-48	AZI8/AZI8	0	TRUE	3
Day3	2_7	MG1655	pOXA-48	AZI8/AZI8	0	TRUE	3
Day3	2_8	MG1655	pOXA-48	AZI8/AZI8	0	TRUE	3
Day3	3_2	MG1655	pOXA-48	AZI8/AZI8	0	TRUE	3
Day3	3_3	MG1655	pOXA-48	AZI8/AZI8	0	TRUE	3
Day3	3_4	MG1655	pOXA-48	AZI8/AZI8	0	TRUE	3
Day3	3_5	MG1655	pOXA-48	AZI8/AZI8	0	TRUE	3
Day3	3_6	MG1655	pOXA-48	AZI8/AZI8	0	TRUE	3
Day3	3_7	MG1655	pOXA-48	AZI8/AZI8	0	TRUE	3
Day3	3_8	MG1655	pOXA-48	AZI8/AZI8	0	TRUE	3
Day3	4_1	MG1655	pOXA-48	AZI8/AZI8	0	TRUE	3
Day3	4_2	MG1655	pOXA-48	AZI8/AZI8	0	TRUE	3
Day3	4_3	MG1655	pOXA-48	AZI8/AZI8	0	TRUE	3
Day3	4_4	MG1655	pOXA-48	AZI8/AZI8	0	TRUE	3
Day3	4_5	MG1655	pOXA-48	AZI8/AZI8	0	TRUE	3
Day3	4_6	MG1655	pOXA-48	AZI8/AZI8	0	TRUE	3
Day3	4_7	MG1655	pOXA-48	AZI8/AZI8	0	TRUE	3
Day3	4_8	MG1655	pOXA-48	AZI8/AZI8	0	TRUE	3
Day3	5_1	MG1655	pOXA-48	AZI8/AZI8	0	TRUE	3
Day3	5_2	MG1655	pOXA-48	AZI8/AZI8	0	TRUE	3
Day3	5_3	MG1655	pOXA-48	AZI8/AZI8	0	TRUE	3
Day3	5_4	MG1655	pOXA-48	AZI8/AZI8	0	TRUE	3
Day3	5_5	MG1655	pOXA-48	AZI8/AZI8	0	TRUE	3
Day3	5_6	MG1655	pOXA-48	AZI8/AZI8	0	TRUE	3
Day3	5_7	MG1655	pOXA-48	AZI8/AZI8	0	TRUE	3
Day3	5_8	MG1655	pOXA-48	AZI8/AZI8	0	TRUE	3
Day3	6_1	MG1655	pOXA-48	AZI8/AZI8	0	TRUE	3
Day3	6_2	MG1655	pOXA-48	AZI8/AZI8	0	TRUE	3
Day3	6_3	MG1655	pOXA-48	AZI8/AZI8	0	TRUE	3
Day3	6_4	MG1655	pOXA-48	AZI8/AZI8	0	TRUE	3
Day3	6_5	MG1655	pOXA-48	AZI8/AZI8	0	TRUE	3
Day3	6_6	MG1655	pOXA-48	AZI8/AZI8	0	TRUE	3
Day3	6_7	MG1655	pOXA-48	AZI8/AZI8	0	TRUE	3
Day3	6_8	MG1655	pOXA-48	AZI8/AZI8	0	TRUE	3
Day3	1_5	MG1655	Empty	AZI8/COL4	0	TRUE	3
Day3	1_6	MG1655	Empty	AZI8/COL4	0	TRUE	3
Day3	1_7	MG1655	Empty	AZI8/COL4	0	TRUE	3
Day3	1_8	MG1655	Empty	AZI8/COL4	0	TRUE	3
Day3	2_3	MG1655	Empty	AZI8/COL4	0	TRUE	3
Day3	2_4	MG1655	Empty	AZI8/COL4	0	TRUE	3
Day3	2_5	MG1655	Empty	AZI8/COL4	0	TRUE	3
Day3	2_6	MG1655	Empty	AZI8/COL4	0	TRUE	3
Day3	2_7	MG1655	Empty	AZI8/COL4	0	TRUE	3
Day3	2_8	MG1655	Empty	AZI8/COL4	0	TRUE	3
Day3	3_4	MG1655	Empty	AZI8/COL4	0	TRUE	3
Day3	3_5	MG1655	Empty	AZI8/COL4	0	TRUE	3
Day3	3_6	MG1655	Empty	AZI8/COL4	0	TRUE	3
Day3	3_7	MG1655	Empty	AZI8/COL4	0	TRUE	3
Day3	3_8	MG1655	Empty	AZI8/COL4	0	TRUE	3
Day3	4_4	MG1655	Empty	AZI8/COL4	0	TRUE	3
Day3	4_5	MG1655	Empty	AZI8/COL4	0	TRUE	3
Day3	4_6	MG1655	Empty	AZI8/COL4	0	TRUE	3
Day3	4_7	MG1655	Empty	AZI8/COL4	0	TRUE	3
Day3	4_8	MG1655	Empty	AZI8/COL4	0	TRUE	3
Day3	5_4	MG1655	Empty	AZI8/COL4	0	TRUE	3
Day3	5_5	MG1655	Empty	AZI8/COL4	0	TRUE	3
Day3	5_6	MG1655	Empty	AZI8/COL4	0	TRUE	3
Day3	5_7	MG1655	Empty	AZI8/COL4	0	TRUE	3
Day3	5_8	MG1655	Empty	AZI8/COL4	0	TRUE	3
Day3	6_4	MG1655	Empty	AZI8/COL4	0	TRUE	3
Day3	6_5	MG1655	Empty	AZI8/COL4	0	TRUE	3
Day3	6_6	MG1655	Empty	AZI8/COL4	0	TRUE	3
Day3	6_7	MG1655	Empty	AZI8/COL4	0	TRUE	3
Day3	6_8	MG1655	Empty	AZI8/COL4	0	TRUE	3
Day3	1_1	MG1655	pOXA-48	AZI8/COL4	0	TRUE	3
Day3	1_2	MG1655	pOXA-48	AZI8/COL4	0	TRUE	3
Day3	1_3	MG1655	pOXA-48	AZI8/COL4	0	TRUE	3
Day3	1_4	MG1655	pOXA-48	AZI8/COL4	0	TRUE	3
Day3	1_5	MG1655	pOXA-48	AZI8/COL4	0	TRUE	3
Day3	1_6	MG1655	pOXA-48	AZI8/COL4	0	TRUE	3
Day3	1_7	MG1655	pOXA-48	AZI8/COL4	0	TRUE	3
Day3	1_8	MG1655	pOXA-48	AZI8/COL4	0	TRUE	3
Day3	2_1	MG1655	pOXA-48	AZI8/COL4	0	TRUE	3
Day3	2_2	MG1655	pOXA-48	AZI8/COL4	0	TRUE	3
Day3	2_3	MG1655	pOXA-48	AZI8/COL4	0	TRUE	3
Day3	2_4	MG1655	pOXA-48	AZI8/COL4	0	TRUE	3
Day3	2_5	MG1655	pOXA-48	AZI8/COL4	0	TRUE	3
Day3	2_6	MG1655	pOXA-48	AZI8/COL4	0	TRUE	3
Day3	2_7	MG1655	pOXA-48	AZI8/COL4	0	TRUE	3
Day3	2_8	MG1655	pOXA-48	AZI8/COL4	0	TRUE	3
Day3	3_2	MG1655	pOXA-48	AZI8/COL4	0	TRUE	3
Day3	3_3	MG1655	pOXA-48	AZI8/COL4	0	TRUE	3
Day3	3_4	MG1655	pOXA-48	AZI8/COL4	0	TRUE	3
Day3	3_5	MG1655	pOXA-48	AZI8/COL4	0	TRUE	3
Day3	3_6	MG1655	pOXA-48	AZI8/COL4	0	TRUE	3
Day3	3_7	MG1655	pOXA-48	AZI8/COL4	0	TRUE	3
Day3	3_8	MG1655	pOXA-48	AZI8/COL4	0	TRUE	3
Day3	4_1	MG1655	pOXA-48	AZI8/COL4	0	TRUE	3
Day3	4_2	MG1655	pOXA-48	AZI8/COL4	0	TRUE	3
Day3	4_3	MG1655	pOXA-48	AZI8/COL4	0	TRUE	3
Day3	4_4	MG1655	pOXA-48	AZI8/COL4	0	TRUE	3
Day3	4_5	MG1655	pOXA-48	AZI8/COL4	0	TRUE	3
Day3	4_6	MG1655	pOXA-48	AZI8/COL4	0	TRUE	3
Day3	4_7	MG1655	pOXA-48	AZI8/COL4	0	TRUE	3
Day3	4_8	MG1655	pOXA-48	AZI8/COL4	0	TRUE	3
Day3	5_1	MG1655	pOXA-48	AZI8/COL4	0	TRUE	3
Day3	5_2	MG1655	pOXA-48	AZI8/COL4	0	TRUE	3
Day3	5_3	MG1655	pOXA-48	AZI8/COL4	0	TRUE	3
Day3	5_4	MG1655	pOXA-48	AZI8/COL4	0	TRUE	3
Day3	5_5	MG1655	pOXA-48	AZI8/COL4	0	TRUE	3
Day3	5_6	MG1655	pOXA-48	AZI8/COL4	0	TRUE	3
Day3	5_7	MG1655	pOXA-48	AZI8/COL4	0	TRUE	3
Day3	5_8	MG1655	pOXA-48	AZI8/COL4	0	TRUE	3
Day3	6_1	MG1655	pOXA-48	AZI8/COL4	0	TRUE	3
Day3	6_2	MG1655	pOXA-48	AZI8/COL4	0	TRUE	3
Day3	6_3	MG1655	pOXA-48	AZI8/COL4	0	TRUE	3
Day3	6_4	MG1655	pOXA-48	AZI8/COL4	0	TRUE	3
Day3	6_5	MG1655	pOXA-48	AZI8/COL4	0	TRUE	3
Day3	6_6	MG1655	pOXA-48	AZI8/COL4	0	TRUE	3
Day3	6_7	MG1655	pOXA-48	AZI8/COL4	0	TRUE	3
Day3	6_8	MG1655	pOXA-48	AZI8/COL4	0	TRUE	3
Day3	1_1	MG1655	Empty	COL4/COL4	0	TRUE	3
Day3	1_2	MG1655	Empty	COL4/COL4	0	TRUE	3
Day3	1_3	MG1655	Empty	COL4/COL4	0	TRUE	3
Day3	1_4	MG1655	Empty	COL4/COL4	0	TRUE	3
Day3	1_5	MG1655	Empty	COL4/COL4	0	TRUE	3
Day3	1_7	MG1655	Empty	COL4/COL4	0	TRUE	3
Day3	2_1	MG1655	Empty	COL4/COL4	0	TRUE	3
Day3	2_2	MG1655	Empty	COL4/COL4	0	TRUE	3
Day3	2_3	MG1655	Empty	COL4/COL4	0	TRUE	3
Day3	2_4	MG1655	Empty	COL4/COL4	0	TRUE	3
Day3	2_5	MG1655	Empty	COL4/COL4	0	TRUE	3
Day3	2_6	MG1655	Empty	COL4/COL4	0	TRUE	3
Day3	2_7	MG1655	Empty	COL4/COL4	0	TRUE	3
Day3	3_1	MG1655	Empty	COL4/COL4	0	TRUE	3
Day3	3_2	MG1655	Empty	COL4/COL4	0	TRUE	3
Day3	3_3	MG1655	Empty	COL4/COL4	0	TRUE	3
Day3	3_4	MG1655	Empty	COL4/COL4	0	TRUE	3
Day3	3_5	MG1655	Empty	COL4/COL4	0	TRUE	3
Day3	3_6	MG1655	Empty	COL4/COL4	0	TRUE	3
Day3	3_7	MG1655	Empty	COL4/COL4	0	TRUE	3
Day3	4_1	MG1655	Empty	COL4/COL4	0	TRUE	3
Day3	4_2	MG1655	Empty	COL4/COL4	0	TRUE	3
Day3	4_3	MG1655	Empty	COL4/COL4	0	TRUE	3
Day3	4_4	MG1655	Empty	COL4/COL4	0	TRUE	3
Day3	4_5	MG1655	Empty	COL4/COL4	0	TRUE	3
Day3	4_6	MG1655	Empty	COL4/COL4	0	TRUE	3
Day3	4_7	MG1655	Empty	COL4/COL4	0	TRUE	3
Day3	5_1	MG1655	Empty	COL4/COL4	0	TRUE	3
Day3	5_2	MG1655	Empty	COL4/COL4	0	TRUE	3
Day3	5_3	MG1655	Empty	COL4/COL4	0	TRUE	3
Day3	5_4	MG1655	Empty	COL4/COL4	0	TRUE	3
Day3	5_5	MG1655	Empty	COL4/COL4	0	TRUE	3
Day3	5_6	MG1655	Empty	COL4/COL4	0	TRUE	3
Day3	6_2	MG1655	Empty	COL4/COL4	0	TRUE	3
Day3	6_3	MG1655	Empty	COL4/COL4	0	TRUE	3
Day3	6_4	MG1655	Empty	COL4/COL4	0	TRUE	3
Day3	6_5	MG1655	Empty	COL4/COL4	0	TRUE	3
Day3	1_1	MG1655	pOXA-48	COL4/COL4	0	TRUE	3
Day3	1_2	MG1655	pOXA-48	COL4/COL4	0	TRUE	3
Day3	1_3	MG1655	pOXA-48	COL4/COL4	0	TRUE	3
Day3	1_4	MG1655	pOXA-48	COL4/COL4	0	TRUE	3
Day3	1_5	MG1655	pOXA-48	COL4/COL4	0	TRUE	3
Day3	1_6	MG1655	pOXA-48	COL4/COL4	0	TRUE	3
Day3	1_7	MG1655	pOXA-48	COL4/COL4	0	TRUE	3
Day3	1_8	MG1655	pOXA-48	COL4/COL4	0	TRUE	3
Day3	2_1	MG1655	pOXA-48	COL4/COL4	0	TRUE	3
Day3	2_2	MG1655	pOXA-48	COL4/COL4	0	TRUE	3
Day3	2_3	MG1655	pOXA-48	COL4/COL4	0	TRUE	3
Day3	2_4	MG1655	pOXA-48	COL4/COL4	0	TRUE	3
Day3	2_5	MG1655	pOXA-48	COL4/COL4	0	TRUE	3
Day3	2_6	MG1655	pOXA-48	COL4/COL4	0	TRUE	3
Day3	2_7	MG1655	pOXA-48	COL4/COL4	0	TRUE	3
Day3	2_8	MG1655	pOXA-48	COL4/COL4	0	TRUE	3
Day3	3_1	MG1655	pOXA-48	COL4/COL4	0	TRUE	3
Day3	3_2	MG1655	pOXA-48	COL4/COL4	0	TRUE	3
Day3	3_3	MG1655	pOXA-48	COL4/COL4	0	TRUE	3
Day3	3_4	MG1655	pOXA-48	COL4/COL4	0	TRUE	3
Day3	3_6	MG1655	pOXA-48	COL4/COL4	0	TRUE	3
Day3	3_7	MG1655	pOXA-48	COL4/COL4	0	TRUE	3
Day3	3_8	MG1655	pOXA-48	COL4/COL4	0	TRUE	3
Day3	4_1	MG1655	pOXA-48	COL4/COL4	0	TRUE	3
Day3	4_2	MG1655	pOXA-48	COL4/COL4	0	TRUE	3
Day3	4_3	MG1655	pOXA-48	COL4/COL4	0	TRUE	3
Day3	4_4	MG1655	pOXA-48	COL4/COL4	0	TRUE	3
Day3	4_5	MG1655	pOXA-48	COL4/COL4	0	TRUE	3
Day3	4_6	MG1655	pOXA-48	COL4/COL4	0	TRUE	3
Day3	4_7	MG1655	pOXA-48	COL4/COL4	0	TRUE	3
Day3	4_8	MG1655	pOXA-48	COL4/COL4	0	TRUE	3
Day3	5_1	MG1655	pOXA-48	COL4/COL4	0	TRUE	3
Day3	5_2	MG1655	pOXA-48	COL4/COL4	0	TRUE	3
Day3	5_3	MG1655	pOXA-48	COL4/COL4	0	TRUE	3
Day3	5_4	MG1655	pOXA-48	COL4/COL4	0	TRUE	3
Day3	5_5	MG1655	pOXA-48	COL4/COL4	0	TRUE	3
Day3	5_6	MG1655	pOXA-48	COL4/COL4	0	TRUE	3
Day3	5_7	MG1655	pOXA-48	COL4/COL4	0	TRUE	3
Day3	5_8	MG1655	pOXA-48	COL4/COL4	0	TRUE	3
Day3	6_1	MG1655	pOXA-48	COL4/COL4	0	TRUE	3
Day3	6_2	MG1655	pOXA-48	COL4/COL4	0	TRUE	3
Day3	6_3	MG1655	pOXA-48	COL4/COL4	0	TRUE	3
Day3	6_6	MG1655	pOXA-48	COL4/COL4	0	TRUE	3
Day3	6_7	MG1655	pOXA-48	COL4/COL4	0	TRUE	3
Day3	1_1	MG1655	Empty	COL4/AZI8	0	TRUE	3
Day3	1_2	MG1655	Empty	COL4/AZI8	0	TRUE	3
Day3	1_3	MG1655	Empty	COL4/AZI8	0	TRUE	3
Day3	1_4	MG1655	Empty	COL4/AZI8	0	TRUE	3
Day3	1_5	MG1655	Empty	COL4/AZI8	0	TRUE	3
Day3	1_7	MG1655	Empty	COL4/AZI8	0	TRUE	3
Day3	2_1	MG1655	Empty	COL4/AZI8	0	TRUE	3
Day3	2_2	MG1655	Empty	COL4/AZI8	0	TRUE	3
Day3	2_3	MG1655	Empty	COL4/AZI8	0	TRUE	3
Day3	2_4	MG1655	Empty	COL4/AZI8	0	TRUE	3
Day3	2_5	MG1655	Empty	COL4/AZI8	0	TRUE	3
Day3	2_6	MG1655	Empty	COL4/AZI8	0	TRUE	3
Day3	2_7	MG1655	Empty	COL4/AZI8	0	TRUE	3
Day3	3_1	MG1655	Empty	COL4/AZI8	0	TRUE	3
Day3	3_2	MG1655	Empty	COL4/AZI8	0	TRUE	3
Day3	3_3	MG1655	Empty	COL4/AZI8	0	TRUE	3
Day3	3_4	MG1655	Empty	COL4/AZI8	0	TRUE	3
Day3	3_5	MG1655	Empty	COL4/AZI8	0	TRUE	3
Day3	3_6	MG1655	Empty	COL4/AZI8	0	TRUE	3
Day3	3_7	MG1655	Empty	COL4/AZI8	0	TRUE	3
Day3	4_1	MG1655	Empty	COL4/AZI8	0	TRUE	3
Day3	4_2	MG1655	Empty	COL4/AZI8	0	TRUE	3
Day3	4_3	MG1655	Empty	COL4/AZI8	0	TRUE	3
Day3	4_4	MG1655	Empty	COL4/AZI8	0	TRUE	3
Day3	4_5	MG1655	Empty	COL4/AZI8	0	TRUE	3
Day3	4_6	MG1655	Empty	COL4/AZI8	0	TRUE	3
Day3	4_7	MG1655	Empty	COL4/AZI8	0	TRUE	3
Day3	5_1	MG1655	Empty	COL4/AZI8	0	TRUE	3
Day3	5_2	MG1655	Empty	COL4/AZI8	0	TRUE	3
Day3	5_3	MG1655	Empty	COL4/AZI8	0	TRUE	3
Day3	5_4	MG1655	Empty	COL4/AZI8	0	TRUE	3
Day3	5_5	MG1655	Empty	COL4/AZI8	0	TRUE	3
Day3	5_6	MG1655	Empty	COL4/AZI8	0	TRUE	3
Day3	6_2	MG1655	Empty	COL4/AZI8	0	TRUE	3
Day3	6_3	MG1655	Empty	COL4/AZI8	0	TRUE	3
Day3	6_4	MG1655	Empty	COL4/AZI8	0	TRUE	3
Day3	6_5	MG1655	Empty	COL4/AZI8	0	TRUE	3
Day3	1_1	MG1655	pOXA-48	COL4/AZI8	0	TRUE	3
Day3	1_2	MG1655	pOXA-48	COL4/AZI8	0	TRUE	3
Day3	1_3	MG1655	pOXA-48	COL4/AZI8	0	TRUE	3
Day3	1_4	MG1655	pOXA-48	COL4/AZI8	0	TRUE	3
Day3	1_5	MG1655	pOXA-48	COL4/AZI8	0	TRUE	3
Day3	1_6	MG1655	pOXA-48	COL4/AZI8	0	TRUE	3
Day3	1_7	MG1655	pOXA-48	COL4/AZI8	0	TRUE	3
Day3	1_8	MG1655	pOXA-48	COL4/AZI8	0	TRUE	3
Day3	2_1	MG1655	pOXA-48	COL4/AZI8	0	TRUE	3
Day3	2_2	MG1655	pOXA-48	COL4/AZI8	0	TRUE	3
Day3	2_3	MG1655	pOXA-48	COL4/AZI8	0	TRUE	3
Day3	2_4	MG1655	pOXA-48	COL4/AZI8	0	TRUE	3
Day3	2_5	MG1655	pOXA-48	COL4/AZI8	0	TRUE	3
Day3	2_6	MG1655	pOXA-48	COL4/AZI8	0	TRUE	3
Day3	2_7	MG1655	pOXA-48	COL4/AZI8	0	TRUE	3
Day3	2_8	MG1655	pOXA-48	COL4/AZI8	0	TRUE	3
Day3	3_1	MG1655	pOXA-48	COL4/AZI8	0	TRUE	3
Day3	3_2	MG1655	pOXA-48	COL4/AZI8	0	TRUE	3
Day3	3_3	MG1655	pOXA-48	COL4/AZI8	0	TRUE	3
Day3	3_4	MG1655	pOXA-48	COL4/AZI8	0	TRUE	3
Day3	3_6	MG1655	pOXA-48	COL4/AZI8	0	TRUE	3
Day3	3_7	MG1655	pOXA-48	COL4/AZI8	0	TRUE	3
Day3	3_8	MG1655	pOXA-48	COL4/AZI8	0	TRUE	3
Day3	4_1	MG1655	pOXA-48	COL4/AZI8	0	TRUE	3
Day3	4_2	MG1655	pOXA-48	COL4/AZI8	0	TRUE	3
Day3	4_3	MG1655	pOXA-48	COL4/AZI8	0	TRUE	3
Day3	4_4	MG1655	pOXA-48	COL4/AZI8	0	TRUE	3
Day3	4_5	MG1655	pOXA-48	COL4/AZI8	0	TRUE	3
Day3	4_6	MG1655	pOXA-48	COL4/AZI8	0	TRUE	3
Day3	4_7	MG1655	pOXA-48	COL4/AZI8	0	TRUE	3
Day3	4_8	MG1655	pOXA-48	COL4/AZI8	0	TRUE	3
Day3	5_1	MG1655	pOXA-48	COL4/AZI8	0	TRUE	3
Day3	5_2	MG1655	pOXA-48	COL4/AZI8	0	TRUE	3
Day3	5_3	MG1655	pOXA-48	COL4/AZI8	0	TRUE	3
Day3	5_4	MG1655	pOXA-48	COL4/AZI8	0	TRUE	3
Day3	5_5	MG1655	pOXA-48	COL4/AZI8	0	TRUE	3
Day3	5_6	MG1655	pOXA-48	COL4/AZI8	0	TRUE	3
Day3	5_7	MG1655	pOXA-48	COL4/AZI8	0	TRUE	3
Day3	5_8	MG1655	pOXA-48	COL4/AZI8	0	TRUE	3
Day3	6_1	MG1655	pOXA-48	COL4/AZI8	0	TRUE	3
Day3	6_2	MG1655	pOXA-48	COL4/AZI8	0	TRUE	3
Day3	6_3	MG1655	pOXA-48	COL4/AZI8	0	TRUE	3
Day3	6_6	MG1655	pOXA-48	COL4/AZI8	0	TRUE	3
Day3	6_7	MG1655	pOXA-48	COL4/AZI8	0	TRUE	3
Day2	col1_1	Ec10	Empty	AZI8/COL4	0	TRUE	2
Day2	col1_2	Ec10	Empty	AZI8/COL4	0	TRUE	2
Day2	col1_3	Ec10	Empty	AZI8/COL4	0	TRUE	2
Day2	col1_4	Ec10	Empty	AZI8/COL4	0	TRUE	2
Day2	col1_5	Ec10	Empty	AZI8/COL4	0	TRUE	2
Day2	col1_6	Ec10	Empty	AZI8/COL4	0	TRUE	2
Day2	col1_7	Ec10	Empty	AZI8/COL4	0	TRUE	2
Day2	col1_8	Ec10	Empty	AZI8/COL4	0	TRUE	2
Day2	col2_1	Ec10	Empty	AZI8/COL4	0	TRUE	2
Day2	col2_2	Ec10	Empty	AZI8/COL4	0	TRUE	2
Day2	col2_3	Ec10	Empty	AZI8/COL4	0	TRUE	2
Day2	col2_4	Ec10	Empty	AZI8/COL4	0	TRUE	2
Day2	col2_5	Ec10	Empty	AZI8/COL4	0	TRUE	2
Day2	col2_6	Ec10	Empty	AZI8/COL4	0	TRUE	2
Day2	col2_7	Ec10	Empty	AZI8/COL4	0	TRUE	2
Day2	col2_8	Ec10	Empty	AZI8/COL4	0	TRUE	2
Day2	col3_1	Ec10	Empty	AZI8/COL4	0	TRUE	2
Day2	col3_2	Ec10	Empty	AZI8/COL4	0	TRUE	2
Day2	col3_3	Ec10	Empty	AZI8/COL4	0	TRUE	2
Day2	col3_4	Ec10	Empty	AZI8/COL4	0	TRUE	2
Day2	col3_5	Ec10	Empty	AZI8/COL4	0	TRUE	2
Day2	col3_6	Ec10	Empty	AZI8/COL4	0	TRUE	2
Day2	col3_7	Ec10	Empty	AZI8/COL4	0	TRUE	2
Day2	col3_8	Ec10	Empty	AZI8/COL4	0	TRUE	2
Day2	col1_1	Ec10	pOXA-48	AZI8/COL4	0	TRUE	2
Day2	col1_2	Ec10	pOXA-48	AZI8/COL4	0	TRUE	2
Day2	col1_3	Ec10	pOXA-48	AZI8/COL4	0	TRUE	2
Day2	col1_4	Ec10	pOXA-48	AZI8/COL4	0	TRUE	2
Day2	col1_5	Ec10	pOXA-48	AZI8/COL4	0	TRUE	2
Day2	col1_6	Ec10	pOXA-48	AZI8/COL4	0	TRUE	2
Day2	col1_7	Ec10	pOXA-48	AZI8/COL4	0	TRUE	2
Day2	col1_8	Ec10	pOXA-48	AZI8/COL4	0	TRUE	2
Day2	col2_1	Ec10	pOXA-48	AZI8/COL4	0	TRUE	2
Day2	col2_2	Ec10	pOXA-48	AZI8/COL4	0	TRUE	2
Day2	col2_3	Ec10	pOXA-48	AZI8/COL4	0	TRUE	2
Day2	col2_4	Ec10	pOXA-48	AZI8/COL4	0	TRUE	2
Day2	col2_5	Ec10	pOXA-48	AZI8/COL4	0	TRUE	2
Day2	col2_6	Ec10	pOXA-48	AZI8/COL4	0	TRUE	2
Day2	col2_7	Ec10	pOXA-48	AZI8/COL4	0	TRUE	2
Day2	col2_8	Ec10	pOXA-48	AZI8/COL4	0	TRUE	2
Day2	col3_1	Ec10	pOXA-48	AZI8/COL4	0	TRUE	2
Day2	col3_2	Ec10	pOXA-48	AZI8/COL4	0	TRUE	2
Day2	col3_3	Ec10	pOXA-48	AZI8/COL4	0	TRUE	2
Day2	col3_4	Ec10	pOXA-48	AZI8/COL4	0	TRUE	2
Day2	col3_5	Ec10	pOXA-48	AZI8/COL4	0	TRUE	2
Day2	col3_6	Ec10	pOXA-48	AZI8/COL4	0	TRUE	2
Day2	col3_7	Ec10	pOXA-48	AZI8/COL4	0	TRUE	2
Day2	col3_8	Ec10	pOXA-48	AZI8/COL4	0	TRUE	2
Day2	col1_1	Ec10	Empty	AZI8/AZI8	0	TRUE	2
Day2	col1_2	Ec10	Empty	AZI8/AZI8	0	TRUE	2
Day2	col1_3	Ec10	Empty	AZI8/AZI8	0	TRUE	2
Day2	col1_4	Ec10	Empty	AZI8/AZI8	0	TRUE	2
Day2	col1_5	Ec10	Empty	AZI8/AZI8	0	TRUE	2
Day2	col1_6	Ec10	Empty	AZI8/AZI8	0	TRUE	2
Day2	col1_7	Ec10	Empty	AZI8/AZI8	0	TRUE	2
Day2	col1_8	Ec10	Empty	AZI8/AZI8	0	TRUE	2
Day2	col2_1	Ec10	Empty	AZI8/AZI8	0	TRUE	2
Day2	col2_2	Ec10	Empty	AZI8/AZI8	0	TRUE	2
Day2	col2_3	Ec10	Empty	AZI8/AZI8	0	TRUE	2
Day2	col2_4	Ec10	Empty	AZI8/AZI8	0	TRUE	2
Day2	col2_5	Ec10	Empty	AZI8/AZI8	0	TRUE	2
Day2	col2_6	Ec10	Empty	AZI8/AZI8	0	TRUE	2
Day2	col2_7	Ec10	Empty	AZI8/AZI8	0	TRUE	2
Day2	col2_8	Ec10	Empty	AZI8/AZI8	0	TRUE	2
Day2	col3_1	Ec10	Empty	AZI8/AZI8	0	TRUE	2
Day2	col3_2	Ec10	Empty	AZI8/AZI8	0	TRUE	2
Day2	col3_3	Ec10	Empty	AZI8/AZI8	0	TRUE	2
Day2	col3_4	Ec10	Empty	AZI8/AZI8	0	TRUE	2
Day2	col3_5	Ec10	Empty	AZI8/AZI8	0	TRUE	2
Day2	col3_6	Ec10	Empty	AZI8/AZI8	0	TRUE	2
Day2	col3_7	Ec10	Empty	AZI8/AZI8	0	TRUE	2
Day2	col3_8	Ec10	Empty	AZI8/AZI8	0	TRUE	2
Day2	col1_1	Ec10	pOXA-48	AZI8/AZI8	0	TRUE	2
Day2	col1_2	Ec10	pOXA-48	AZI8/AZI8	0	TRUE	2
Day2	col1_3	Ec10	pOXA-48	AZI8/AZI8	0	TRUE	2
Day2	col1_4	Ec10	pOXA-48	AZI8/AZI8	0	TRUE	2
Day2	col1_5	Ec10	pOXA-48	AZI8/AZI8	0	TRUE	2
Day2	col1_6	Ec10	pOXA-48	AZI8/AZI8	0	TRUE	2
Day2	col1_7	Ec10	pOXA-48	AZI8/AZI8	0	TRUE	2
Day2	col1_8	Ec10	pOXA-48	AZI8/AZI8	0	TRUE	2
Day2	col2_1	Ec10	pOXA-48	AZI8/AZI8	0	TRUE	2
Day2	col2_2	Ec10	pOXA-48	AZI8/AZI8	0	TRUE	2
Day2	col2_3	Ec10	pOXA-48	AZI8/AZI8	0	TRUE	2
Day2	col2_4	Ec10	pOXA-48	AZI8/AZI8	0	TRUE	2
Day2	col2_5	Ec10	pOXA-48	AZI8/AZI8	0	TRUE	2
Day2	col2_6	Ec10	pOXA-48	AZI8/AZI8	0	TRUE	2
Day2	col2_7	Ec10	pOXA-48	AZI8/AZI8	0	TRUE	2
Day2	col2_8	Ec10	pOXA-48	AZI8/AZI8	0	TRUE	2
Day2	col3_1	Ec10	pOXA-48	AZI8/AZI8	0	TRUE	2
Day2	col3_2	Ec10	pOXA-48	AZI8/AZI8	0	TRUE	2
Day2	col3_3	Ec10	pOXA-48	AZI8/AZI8	0	TRUE	2
Day2	col3_4	Ec10	pOXA-48	AZI8/AZI8	0	TRUE	2
Day2	col3_5	Ec10	pOXA-48	AZI8/AZI8	0	TRUE	2
Day2	col3_6	Ec10	pOXA-48	AZI8/AZI8	0	TRUE	2
Day2	col3_7	Ec10	pOXA-48	AZI8/AZI8	0	TRUE	2
Day2	col3_8	Ec10	pOXA-48	AZI8/AZI8	0	TRUE	2
Day3	col1_1	Ec10	pOXA-48	COL4/COL4	0	TRUE	3
Day3	col1_2	Ec10	pOXA-48	COL4/COL4	0	TRUE	3
Day3	col1_3	Ec10	pOXA-48	COL4/COL4	0	TRUE	3
Day3	col1_4	Ec10	pOXA-48	COL4/COL4	0	TRUE	3
Day3	col1_5	Ec10	pOXA-48	COL4/COL4	0	TRUE	3
Day3	col1_6	Ec10	pOXA-48	COL4/COL4	0	TRUE	3
Day3	col1_7	Ec10	pOXA-48	COL4/COL4	0	TRUE	3
Day3	col1_8	Ec10	pOXA-48	COL4/COL4	0	TRUE	3
Day3	col2_1	Ec10	pOXA-48	COL4/COL4	0	TRUE	3
Day3	col2_2	Ec10	pOXA-48	COL4/COL4	0	TRUE	3
Day3	col2_3	Ec10	pOXA-48	COL4/COL4	0	TRUE	3
Day3	col2_4	Ec10	pOXA-48	COL4/COL4	0	TRUE	3
Day3	col2_5	Ec10	pOXA-48	COL4/COL4	0	TRUE	3
Day3	col2_6	Ec10	pOXA-48	COL4/COL4	0	TRUE	3
Day3	col2_7	Ec10	pOXA-48	COL4/COL4	0	TRUE	3
Day3	col2_8	Ec10	pOXA-48	COL4/COL4	0	TRUE	3
Day3	col3_1	Ec10	pOXA-48	COL4/COL4	0	TRUE	3
Day3	col3_2	Ec10	pOXA-48	COL4/COL4	0	TRUE	3
Day3	col3_3	Ec10	pOXA-48	COL4/COL4	0	TRUE	3
Day3	col3_4	Ec10	pOXA-48	COL4/COL4	0	TRUE	3
Day3	col3_5	Ec10	pOXA-48	COL4/COL4	0	TRUE	3
Day3	col3_6	Ec10	pOXA-48	COL4/COL4	0	TRUE	3
Day3	col3_7	Ec10	pOXA-48	COL4/COL4	0	TRUE	3
Day3	col3_8	Ec10	pOXA-48	COL4/COL4	0	TRUE	3
Day3	col1_1	Ec10	pOXA-48	COL4/AZI8	0	TRUE	3
Day3	col1_2	Ec10	pOXA-48	COL4/AZI8	0	TRUE	3
Day3	col1_3	Ec10	pOXA-48	COL4/AZI8	0	TRUE	3
Day3	col1_4	Ec10	pOXA-48	COL4/AZI8	0	TRUE	3
Day3	col1_5	Ec10	pOXA-48	COL4/AZI8	0	TRUE	3
Day3	col1_6	Ec10	pOXA-48	COL4/AZI8	0	TRUE	3
Day3	col1_7	Ec10	pOXA-48	COL4/AZI8	0	TRUE	3
Day3	col1_8	Ec10	pOXA-48	COL4/AZI8	0	TRUE	3
Day3	col2_1	Ec10	pOXA-48	COL4/AZI8	0	TRUE	3
Day3	col2_2	Ec10	pOXA-48	COL4/AZI8	0	TRUE	3
Day3	col2_3	Ec10	pOXA-48	COL4/AZI8	0	TRUE	3
Day3	col2_4	Ec10	pOXA-48	COL4/AZI8	0	TRUE	3
Day3	col2_5	Ec10	pOXA-48	COL4/AZI8	0	TRUE	3
Day3	col2_6	Ec10	pOXA-48	COL4/AZI8	0	TRUE	3
Day3	col2_7	Ec10	pOXA-48	COL4/AZI8	0	TRUE	3
Day3	col2_8	Ec10	pOXA-48	COL4/AZI8	0	TRUE	3
Day3	col3_1	Ec10	pOXA-48	COL4/AZI8	0	TRUE	3
Day3	col3_2	Ec10	pOXA-48	COL4/AZI8	0	TRUE	3
Day3	col3_3	Ec10	pOXA-48	COL4/AZI8	0	TRUE	3
Day3	col3_4	Ec10	pOXA-48	COL4/AZI8	0	TRUE	3
Day3	col3_5	Ec10	pOXA-48	COL4/AZI8	0	TRUE	3
Day3	col3_6	Ec10	pOXA-48	COL4/AZI8	0	TRUE	3
Day3	col3_7	Ec10	pOXA-48	COL4/AZI8	0	TRUE	3
Day3	col3_8	Ec10	pOXA-48	COL4/AZI8	0	TRUE	3
Day3	col1_7	Ec18	Empty	AZI8/AZI8	0	TRUE	3
Day3	col1_1	Ec18	pOXA-48	AZI8/AZI8	0	TRUE	3
Day3	col1_2	Ec18	pOXA-48	AZI8/AZI8	0	TRUE	3
Day3	col1_3	Ec18	pOXA-48	AZI8/AZI8	0	TRUE	3
Day3	col1_5	Ec18	pOXA-48	AZI8/AZI8	0	TRUE	3
Day3	col1_6	Ec18	pOXA-48	AZI8/AZI8	0	TRUE	3
Day3	col1_7	Ec18	pOXA-48	AZI8/AZI8	0	TRUE	3
Day3	col1_8	Ec18	pOXA-48	AZI8/AZI8	0	TRUE	3
Day3	col2_1	Ec18	pOXA-48	AZI8/AZI8	0	TRUE	3
Day3	col2_2	Ec18	pOXA-48	AZI8/AZI8	0	TRUE	3
Day3	col2_3	Ec18	pOXA-48	AZI8/AZI8	0	TRUE	3
Day3	col2_4	Ec18	pOXA-48	AZI8/AZI8	0	TRUE	3
Day3	col2_6	Ec18	pOXA-48	AZI8/AZI8	0	TRUE	3
Day3	col2_7	Ec18	pOXA-48	AZI8/AZI8	0	TRUE	3
Day3	col3_2	Ec18	pOXA-48	AZI8/AZI8	0	TRUE	3
Day3	col3_3	Ec18	pOXA-48	AZI8/AZI8	0	TRUE	3
Day3	col3_4	Ec18	pOXA-48	AZI8/AZI8	0	TRUE	3
Day3	col3_5	Ec18	pOXA-48	AZI8/AZI8	0	TRUE	3
Day3	col3_6	Ec18	pOXA-48	AZI8/AZI8	0	TRUE	3
Day3	col3_7	Ec18	pOXA-48	AZI8/AZI8	0	TRUE	3
Day3	col1_4	Ec18	Empty	COL4/AZI8	0	TRUE	3
Day3	col2_4	Ec18	Empty	COL4/AZI8	0	TRUE	3
Day3	col1_3	Ec18	pOXA-48	COL4/AZI8	0	TRUE	3
Day3	col1_4	Ec18	pOXA-48	COL4/AZI8	0	TRUE	3
Day3	col1_5	Ec18	pOXA-48	COL4/AZI8	0	TRUE	3
Day3	col2_3	Ec18	pOXA-48	COL4/AZI8	0	TRUE	3
Day3	col3_1	Ec18	pOXA-48	COL4/AZI8	0	TRUE	3
Day3	col1_1	Ec21	Empty	AZI8/AZI8	0	TRUE	3
Day3	col1_5	Ec21	pOXA-48	AZI8/AZI8	0	TRUE	3
Day3	col1_7	Ec21	pOXA-48	AZI8/AZI8	0	TRUE	3
Day3	col2_6	Ec21	pOXA-48	AZI8/AZI8	0	TRUE	3
Day3	col2_4	Ec21	pOXA-48	COL4/AZI8	0	TRUE	3
Day3	col1_1	Ec10	Empty	AZI8/COL4	0	TRUE	3
Day3	col1_2	Ec10	Empty	AZI8/COL4	0	TRUE	3
Day3	col1_3	Ec10	Empty	AZI8/COL4	0	TRUE	3
Day3	col1_4	Ec10	Empty	AZI8/COL4	0	TRUE	3
Day3	col1_5	Ec10	Empty	AZI8/COL4	0	TRUE	3
Day3	col1_6	Ec10	Empty	AZI8/COL4	0	TRUE	3
Day3	col1_7	Ec10	Empty	AZI8/COL4	0	TRUE	3
Day3	col1_8	Ec10	Empty	AZI8/COL4	0	TRUE	3
Day3	col2_1	Ec10	Empty	AZI8/COL4	0	TRUE	3
Day3	col2_2	Ec10	Empty	AZI8/COL4	0	TRUE	3
Day3	col2_3	Ec10	Empty	AZI8/COL4	0	TRUE	3
Day3	col2_4	Ec10	Empty	AZI8/COL4	0	TRUE	3
Day3	col2_5	Ec10	Empty	AZI8/COL4	0	TRUE	3
Day3	col2_6	Ec10	Empty	AZI8/COL4	0	TRUE	3
Day3	col2_7	Ec10	Empty	AZI8/COL4	0	TRUE	3
Day3	col2_8	Ec10	Empty	AZI8/COL4	0	TRUE	3
Day3	col3_1	Ec10	Empty	AZI8/COL4	0	TRUE	3
Day3	col3_2	Ec10	Empty	AZI8/COL4	0	TRUE	3
Day3	col3_3	Ec10	Empty	AZI8/COL4	0	TRUE	3
Day3	col3_4	Ec10	Empty	AZI8/COL4	0	TRUE	3
Day3	col3_5	Ec10	Empty	AZI8/COL4	0	TRUE	3
Day3	col3_6	Ec10	Empty	AZI8/COL4	0	TRUE	3
Day3	col3_7	Ec10	Empty	AZI8/COL4	0	TRUE	3
Day3	col3_8	Ec10	Empty	AZI8/COL4	0	TRUE	3
Day3	col1_1	Ec10	pOXA-48	AZI8/COL4	0	TRUE	3
Day3	col1_2	Ec10	pOXA-48	AZI8/COL4	0	TRUE	3
Day3	col1_3	Ec10	pOXA-48	AZI8/COL4	0	TRUE	3
Day3	col1_4	Ec10	pOXA-48	AZI8/COL4	0	TRUE	3
Day3	col1_5	Ec10	pOXA-48	AZI8/COL4	0	TRUE	3
Day3	col1_6	Ec10	pOXA-48	AZI8/COL4	0	TRUE	3
Day3	col1_7	Ec10	pOXA-48	AZI8/COL4	0	TRUE	3
Day3	col1_8	Ec10	pOXA-48	AZI8/COL4	0	TRUE	3
Day3	col2_1	Ec10	pOXA-48	AZI8/COL4	0	TRUE	3
Day3	col2_2	Ec10	pOXA-48	AZI8/COL4	0	TRUE	3
Day3	col2_3	Ec10	pOXA-48	AZI8/COL4	0	TRUE	3
Day3	col2_4	Ec10	pOXA-48	AZI8/COL4	0	TRUE	3
Day3	col2_5	Ec10	pOXA-48	AZI8/COL4	0	TRUE	3
Day3	col2_6	Ec10	pOXA-48	AZI8/COL4	0	TRUE	3
Day3	col2_7	Ec10	pOXA-48	AZI8/COL4	0	TRUE	3
Day3	col2_8	Ec10	pOXA-48	AZI8/COL4	0	TRUE	3
Day3	col3_1	Ec10	pOXA-48	AZI8/COL4	0	TRUE	3
Day3	col3_2	Ec10	pOXA-48	AZI8/COL4	0	TRUE	3
Day3	col3_3	Ec10	pOXA-48	AZI8/COL4	0	TRUE	3
Day3	col3_4	Ec10	pOXA-48	AZI8/COL4	0	TRUE	3
Day3	col3_5	Ec10	pOXA-48	AZI8/COL4	0	TRUE	3
Day3	col3_6	Ec10	pOXA-48	AZI8/COL4	0	TRUE	3
Day3	col3_7	Ec10	pOXA-48	AZI8/COL4	0	TRUE	3
Day3	col3_8	Ec10	pOXA-48	AZI8/COL4	0	TRUE	3
Day3	col1_1	Ec10	Empty	AZI8/AZI8	0	TRUE	3
Day3	col1_2	Ec10	Empty	AZI8/AZI8	0	TRUE	3
Day3	col1_3	Ec10	Empty	AZI8/AZI8	0	TRUE	3
Day3	col1_4	Ec10	Empty	AZI8/AZI8	0	TRUE	3
Day3	col1_5	Ec10	Empty	AZI8/AZI8	0	TRUE	3
Day3	col1_6	Ec10	Empty	AZI8/AZI8	0	TRUE	3
Day3	col1_7	Ec10	Empty	AZI8/AZI8	0	TRUE	3
Day3	col1_8	Ec10	Empty	AZI8/AZI8	0	TRUE	3
Day3	col2_1	Ec10	Empty	AZI8/AZI8	0	TRUE	3
Day3	col2_2	Ec10	Empty	AZI8/AZI8	0	TRUE	3
Day3	col2_3	Ec10	Empty	AZI8/AZI8	0	TRUE	3
Day3	col2_4	Ec10	Empty	AZI8/AZI8	0	TRUE	3
Day3	col2_5	Ec10	Empty	AZI8/AZI8	0	TRUE	3
Day3	col2_6	Ec10	Empty	AZI8/AZI8	0	TRUE	3
Day3	col2_7	Ec10	Empty	AZI8/AZI8	0	TRUE	3
Day3	col2_8	Ec10	Empty	AZI8/AZI8	0	TRUE	3
Day3	col3_1	Ec10	Empty	AZI8/AZI8	0	TRUE	3
Day3	col3_2	Ec10	Empty	AZI8/AZI8	0	TRUE	3
Day3	col3_3	Ec10	Empty	AZI8/AZI8	0	TRUE	3
Day3	col3_4	Ec10	Empty	AZI8/AZI8	0	TRUE	3
Day3	col3_5	Ec10	Empty	AZI8/AZI8	0	TRUE	3
Day3	col3_6	Ec10	Empty	AZI8/AZI8	0	TRUE	3
Day3	col3_7	Ec10	Empty	AZI8/AZI8	0	TRUE	3
Day3	col3_8	Ec10	Empty	AZI8/AZI8	0	TRUE	3
Day3	col1_1	Ec10	pOXA-48	AZI8/AZI8	0	TRUE	3
Day3	col1_2	Ec10	pOXA-48	AZI8/AZI8	0	TRUE	3
Day3	col1_3	Ec10	pOXA-48	AZI8/AZI8	0	TRUE	3
Day3	col1_4	Ec10	pOXA-48	AZI8/AZI8	0	TRUE	3
Day3	col1_5	Ec10	pOXA-48	AZI8/AZI8	0	TRUE	3
Day3	col1_6	Ec10	pOXA-48	AZI8/AZI8	0	TRUE	3
Day3	col1_7	Ec10	pOXA-48	AZI8/AZI8	0	TRUE	3
Day3	col1_8	Ec10	pOXA-48	AZI8/AZI8	0	TRUE	3
Day3	col2_1	Ec10	pOXA-48	AZI8/AZI8	0	TRUE	3
Day3	col2_2	Ec10	pOXA-48	AZI8/AZI8	0	TRUE	3
Day3	col2_3	Ec10	pOXA-48	AZI8/AZI8	0	TRUE	3
Day3	col2_4	Ec10	pOXA-48	AZI8/AZI8	0	TRUE	3
Day3	col2_5	Ec10	pOXA-48	AZI8/AZI8	0	TRUE	3
Day3	col2_6	Ec10	pOXA-48	AZI8/AZI8	0	TRUE	3
Day3	col2_7	Ec10	pOXA-48	AZI8/AZI8	0	TRUE	3
Day3	col2_8	Ec10	pOXA-48	AZI8/AZI8	0	TRUE	3
Day3	col3_1	Ec10	pOXA-48	AZI8/AZI8	0	TRUE	3
Day3	col3_2	Ec10	pOXA-48	AZI8/AZI8	0	TRUE	3
Day3	col3_3	Ec10	pOXA-48	AZI8/AZI8	0	TRUE	3
Day3	col3_4	Ec10	pOXA-48	AZI8/AZI8	0	TRUE	3
Day3	col3_5	Ec10	pOXA-48	AZI8/AZI8	0	TRUE	3
Day3	col3_6	Ec10	pOXA-48	AZI8/AZI8	0	TRUE	3
Day3	col3_7	Ec10	pOXA-48	AZI8/AZI8	0	TRUE	3
Day3	col3_8	Ec10	pOXA-48	AZI8/AZI8	0	TRUE	3
Day2	col1_2	Ec10	pOXA-48	COL4/COL4	0.046	TRUE	2
Day2	col1_4	Ec10	pOXA-48	COL4/COL4	0.046	TRUE	2
Day2	col1_5	Ec10	pOXA-48	COL4/COL4	0.046	TRUE	2
Day2	col1_6	Ec10	pOXA-48	COL4/COL4	0.046	TRUE	2
Day2	col2_1	Ec10	pOXA-48	COL4/COL4	0.046	TRUE	2
Day2	col2_4	Ec10	pOXA-48	COL4/COL4	0.046	TRUE	2
Day2	col2_5	Ec10	pOXA-48	COL4/COL4	0.046	TRUE	2
Day2	col3_4	Ec10	pOXA-48	COL4/COL4	0.046	TRUE	2
Day2	col3_5	Ec10	pOXA-48	COL4/COL4	0.046	TRUE	2
Day2	col3_8	Ec10	pOXA-48	COL4/COL4	0.046	TRUE	2
Day2	col1_2	Ec10	pOXA-48	COL4/AZI8	0.046	TRUE	2
Day2	col1_4	Ec10	pOXA-48	COL4/AZI8	0.046	TRUE	2
Day2	col1_5	Ec10	pOXA-48	COL4/AZI8	0.046	TRUE	2
Day2	col1_6	Ec10	pOXA-48	COL4/AZI8	0.046	TRUE	2
Day2	col2_1	Ec10	pOXA-48	COL4/AZI8	0.046	TRUE	2
Day2	col2_4	Ec10	pOXA-48	COL4/AZI8	0.046	TRUE	2
Day2	col2_5	Ec10	pOXA-48	COL4/AZI8	0.046	TRUE	2
Day2	col3_4	Ec10	pOXA-48	COL4/AZI8	0.046	TRUE	2
Day2	col3_5	Ec10	pOXA-48	COL4/AZI8	0.046	TRUE	2
Day2	col3_8	Ec10	pOXA-48	COL4/AZI8	0.046	TRUE	2
Day2	col1_4	Ec18	pOXA-48	COL4/COL4	0.046	TRUE	2
Day2	col2_3	Ec18	pOXA-48	COL4/COL4	0.046	TRUE	2
Day2	col2_4	Ec18	pOXA-48	COL4/COL4	0.046	TRUE	2
Day2	col3_4	Ec18	pOXA-48	COL4/COL4	0.046	TRUE	2
Day2	col3_5	Ec18	pOXA-48	COL4/COL4	0.046	TRUE	2
Day2	col1_4	Ec18	pOXA-48	COL4/AZI8	0.046	TRUE	2
Day2	col2_3	Ec18	pOXA-48	COL4/AZI8	0.046	TRUE	2
Day2	col2_4	Ec18	pOXA-48	COL4/AZI8	0.046	TRUE	2
Day2	col3_4	Ec18	pOXA-48	COL4/AZI8	0.046	TRUE	2
Day2	col3_5	Ec18	pOXA-48	COL4/AZI8	0.046	TRUE	2
Day2	col1_4	Ec21	pOXA-48	COL4/AZI8	0.046	TRUE	2
Day2	col1_4	Ec21	pOXA-48	COL4/COL4	0.046	TRUE	2
Day3	col1_6	Ec18	pOXA-48	COL4/COL4	0.046	TRUE	3
Day3	6_1	MG1655	Empty	AZI8/COL4	0.047	TRUE	3
Day2	col1_3	Ec10	pOXA-48	COL4/COL4	0.047	TRUE	2
Day2	col1_8	Ec10	pOXA-48	COL4/COL4	0.047	TRUE	2
Day2	col2_2	Ec10	pOXA-48	COL4/COL4	0.047	TRUE	2
Day2	col2_3	Ec10	pOXA-48	COL4/COL4	0.047	TRUE	2
Day2	col2_6	Ec10	pOXA-48	COL4/COL4	0.047	TRUE	2
Day2	col2_8	Ec10	pOXA-48	COL4/COL4	0.047	TRUE	2
Day2	col3_1	Ec10	pOXA-48	COL4/COL4	0.047	TRUE	2
Day2	col3_6	Ec10	pOXA-48	COL4/COL4	0.047	TRUE	2
Day2	col1_3	Ec10	pOXA-48	COL4/AZI8	0.047	TRUE	2
Day2	col1_8	Ec10	pOXA-48	COL4/AZI8	0.047	TRUE	2
Day2	col2_2	Ec10	pOXA-48	COL4/AZI8	0.047	TRUE	2
Day2	col2_3	Ec10	pOXA-48	COL4/AZI8	0.047	TRUE	2
Day2	col2_6	Ec10	pOXA-48	COL4/AZI8	0.047	TRUE	2
Day2	col2_8	Ec10	pOXA-48	COL4/AZI8	0.047	TRUE	2
Day2	col3_1	Ec10	pOXA-48	COL4/AZI8	0.047	TRUE	2
Day2	col3_6	Ec10	pOXA-48	COL4/AZI8	0.047	TRUE	2
Day2	col2_4	Ec18	Empty	COL4/COL4	0.047	TRUE	2
Day2	col1_5	Ec18	pOXA-48	COL4/COL4	0.047	TRUE	2
Day2	col2_4	Ec18	Empty	COL4/AZI8	0.047	TRUE	2
Day2	col1_5	Ec18	pOXA-48	COL4/AZI8	0.047	TRUE	2
Day2	col2_4	Ec21	pOXA-48	COL4/AZI8	0.047	TRUE	2
Day2	col3_1	Ec25	pOXA-48	COL4/AZI8	0.047	TRUE	2
Day2	col2_4	Ec21	pOXA-48	COL4/COL4	0.047	TRUE	2
Day2	col3_1	Ec25	pOXA-48	COL4/COL4	0.047	TRUE	2
Day3	col2_5	Ec18	pOXA-48	COL4/COL4	0.047	TRUE	3
Day3	col2_4	Ec25	Empty	AZI8/COL4	0.047	TRUE	3
Day3	col2_2	Ec25	Empty	COL4/COL4	0.047	TRUE	3
Day3	1_1	MG1655	Empty	AZI8/COL4	0.048	TRUE	3
Day3	3_1	MG1655	Empty	AZI8/COL4	0.048	TRUE	3
Day3	5_1	MG1655	Empty	AZI8/COL4	0.048	TRUE	3
Day3	3_8	MG1655	Empty	COL4/COL4	0.048	TRUE	3
Day3	4_8	MG1655	Empty	COL4/COL4	0.048	TRUE	3
Day3	6_8	MG1655	Empty	COL4/COL4	0.048	TRUE	3
Day3	6_8	MG1655	pOXA-48	COL4/COL4	0.048	TRUE	3
Day2	col1_1	Ec10	pOXA-48	COL4/COL4	0.048	TRUE	2
Day2	col1_7	Ec10	pOXA-48	COL4/COL4	0.048	TRUE	2
Day2	col1_1	Ec10	pOXA-48	COL4/AZI8	0.048	TRUE	2
Day2	col1_7	Ec10	pOXA-48	COL4/AZI8	0.048	TRUE	2
Day2	col1_4	Ec18	Empty	COL4/COL4	0.048	TRUE	2
Day2	col3_2	Ec18	pOXA-48	COL4/COL4	0.048	TRUE	2
Day2	col3_3	Ec18	pOXA-48	COL4/COL4	0.048	TRUE	2
Day2	col1_4	Ec18	Empty	COL4/AZI8	0.048	TRUE	2
Day2	col3_2	Ec18	pOXA-48	COL4/AZI8	0.048	TRUE	2
Day2	col3_3	Ec18	pOXA-48	COL4/AZI8	0.048	TRUE	2
Day3	col1_4	Ec10	Empty	COL4/COL4	0.048	TRUE	3
Day3	col1_5	Ec10	Empty	COL4/COL4	0.048	TRUE	3
Day3	col1_6	Ec10	Empty	COL4/COL4	0.048	TRUE	3
Day3	col2_5	Ec10	Empty	COL4/COL4	0.048	TRUE	3
Day3	col2_6	Ec10	Empty	COL4/COL4	0.048	TRUE	3
Day3	col2_7	Ec10	Empty	COL4/COL4	0.048	TRUE	3
Day3	col3_1	Ec10	Empty	COL4/COL4	0.048	TRUE	3
Day3	col3_2	Ec10	Empty	COL4/COL4	0.048	TRUE	3
Day3	col3_3	Ec10	Empty	COL4/COL4	0.048	TRUE	3
Day3	col3_4	Ec10	Empty	COL4/COL4	0.048	TRUE	3
Day3	col3_6	Ec10	Empty	COL4/COL4	0.048	TRUE	3
Day3	col3_7	Ec10	Empty	COL4/COL4	0.048	TRUE	3
Day3	col2_7	Ec18	Empty	COL4/COL4	0.048	TRUE	3
Day3	col3_4	Ec18	Empty	COL4/COL4	0.048	TRUE	3
Day3	col3_6	Ec18	Empty	COL4/COL4	0.048	TRUE	3
Day3	col1_3	Ec18	pOXA-48	COL4/COL4	0.048	TRUE	3
Day3	col1_5	Ec18	pOXA-48	COL4/COL4	0.048	TRUE	3
Day3	col2_1	Ec18	pOXA-48	COL4/COL4	0.048	TRUE	3
Day3	col2_2	Ec18	pOXA-48	COL4/COL4	0.048	TRUE	3
Day3	col2_7	Ec18	pOXA-48	COL4/COL4	0.048	TRUE	3
Day3	col3_2	Ec18	pOXA-48	COL4/COL4	0.048	TRUE	3
Day3	col3_3	Ec18	pOXA-48	COL4/COL4	0.048	TRUE	3
Day3	col3_5	Ec18	pOXA-48	COL4/COL4	0.048	TRUE	3
Day3	col3_8	Ec18	pOXA-48	COL4/COL4	0.048	TRUE	3
Day3	col1_5	Ec18	Empty	AZI8/COL4	0.048	TRUE	3
Day3	col2_1	Ec18	Empty	AZI8/COL4	0.048	TRUE	3
Day3	col2_4	Ec18	Empty	AZI8/COL4	0.048	TRUE	3
Day3	col3_3	Ec18	Empty	AZI8/COL4	0.048	TRUE	3
Day3	col3_4	Ec18	Empty	AZI8/COL4	0.048	TRUE	3
Day3	col3_6	Ec18	Empty	AZI8/COL4	0.048	TRUE	3
Day3	col3_7	Ec18	Empty	AZI8/COL4	0.048	TRUE	3
Day3	col3_8	Ec18	Empty	AZI8/COL4	0.048	TRUE	3
Day3	col1_5	Ec18	pOXA-48	AZI8/COL4	0.048	TRUE	3
Day3	col2_6	Ec18	pOXA-48	AZI8/COL4	0.048	TRUE	3
Day3	col3_1	Ec18	pOXA-48	AZI8/COL4	0.048	TRUE	3
Day3	col3_2	Ec18	pOXA-48	AZI8/COL4	0.048	TRUE	3
Day3	col3_3	Ec18	pOXA-48	AZI8/COL4	0.048	TRUE	3
Day3	col3_4	Ec18	pOXA-48	AZI8/COL4	0.048	TRUE	3
Day3	col3_6	Ec18	pOXA-48	AZI8/COL4	0.048	TRUE	3
Day3	col1_3	Ec21	Empty	AZI8/COL4	0.048	TRUE	3
Day3	col2_1	Ec21	Empty	AZI8/COL4	0.048	TRUE	3
Day3	col2_3	Ec21	Empty	AZI8/COL4	0.048	TRUE	3
Day3	col2_4	Ec21	Empty	AZI8/COL4	0.048	TRUE	3
Day3	col2_5	Ec21	Empty	AZI8/COL4	0.048	TRUE	3
Day3	col2_6	Ec21	Empty	AZI8/COL4	0.048	TRUE	3
Day3	col2_8	Ec21	Empty	AZI8/COL4	0.048	TRUE	3
Day3	col3_2	Ec21	Empty	AZI8/COL4	0.048	TRUE	3
Day3	col3_3	Ec21	Empty	AZI8/COL4	0.048	TRUE	3
Day3	col3_4	Ec21	Empty	AZI8/COL4	0.048	TRUE	3
Day3	col3_5	Ec21	Empty	AZI8/COL4	0.048	TRUE	3
Day3	col3_6	Ec21	Empty	AZI8/COL4	0.048	TRUE	3
Day3	col1_3	Ec21	pOXA-48	AZI8/COL4	0.048	TRUE	3
Day3	col1_4	Ec21	pOXA-48	AZI8/COL4	0.048	TRUE	3
Day3	col1_5	Ec21	pOXA-48	AZI8/COL4	0.048	TRUE	3
Day3	col1_6	Ec21	pOXA-48	AZI8/COL4	0.048	TRUE	3
Day3	col2_1	Ec21	pOXA-48	AZI8/COL4	0.048	TRUE	3
Day3	col2_2	Ec21	pOXA-48	AZI8/COL4	0.048	TRUE	3
Day3	col2_3	Ec21	pOXA-48	AZI8/COL4	0.048	TRUE	3
Day3	col2_6	Ec21	pOXA-48	AZI8/COL4	0.048	TRUE	3
Day3	col3_1	Ec21	pOXA-48	AZI8/COL4	0.048	TRUE	3
Day3	col3_3	Ec21	pOXA-48	AZI8/COL4	0.048	TRUE	3
Day3	col3_4	Ec21	pOXA-48	AZI8/COL4	0.048	TRUE	3
Day3	col3_5	Ec21	pOXA-48	AZI8/COL4	0.048	TRUE	3
Day3	col3_6	Ec21	pOXA-48	AZI8/COL4	0.048	TRUE	3
Day3	col3_8	Ec21	pOXA-48	AZI8/COL4	0.048	TRUE	3
Day3	col1_1	Ec25	Empty	AZI8/COL4	0.048	TRUE	3
Day3	col1_2	Ec25	Empty	AZI8/COL4	0.048	TRUE	3
Day3	col1_3	Ec25	Empty	AZI8/COL4	0.048	TRUE	3
Day3	col1_4	Ec25	Empty	AZI8/COL4	0.048	TRUE	3
Day3	col1_5	Ec25	Empty	AZI8/COL4	0.048	TRUE	3
Day3	col1_6	Ec25	Empty	AZI8/COL4	0.048	TRUE	3
Day3	col1_8	Ec25	Empty	AZI8/COL4	0.048	TRUE	3
Day3	col2_1	Ec25	Empty	AZI8/COL4	0.048	TRUE	3
Day3	col2_2	Ec25	Empty	AZI8/COL4	0.048	TRUE	3
Day3	col2_3	Ec25	Empty	AZI8/COL4	0.048	TRUE	3
Day3	col2_5	Ec25	Empty	AZI8/COL4	0.048	TRUE	3
Day3	col2_6	Ec25	Empty	AZI8/COL4	0.048	TRUE	3
Day3	col2_8	Ec25	Empty	AZI8/COL4	0.048	TRUE	3
Day3	col3_4	Ec25	Empty	AZI8/COL4	0.048	TRUE	3
Day3	col3_5	Ec25	Empty	AZI8/COL4	0.048	TRUE	3
Day3	col1_1	Ec25	pOXA-48	AZI8/COL4	0.048	TRUE	3
Day3	col1_5	Ec25	pOXA-48	AZI8/COL4	0.048	TRUE	3
Day3	col1_6	Ec25	pOXA-48	AZI8/COL4	0.048	TRUE	3
Day3	col1_8	Ec25	pOXA-48	AZI8/COL4	0.048	TRUE	3
Day3	col2_2	Ec25	pOXA-48	AZI8/COL4	0.048	TRUE	3
Day3	col2_7	Ec25	pOXA-48	AZI8/COL4	0.048	TRUE	3
Day3	col3_3	Ec25	pOXA-48	AZI8/COL4	0.048	TRUE	3
Day3	col3_5	Ec21	Empty	COL4/COL4	0.048	TRUE	3
Day3	col2_8	Ec21	pOXA-48	COL4/COL4	0.048	TRUE	3
Day3	col3_2	Ec21	pOXA-48	COL4/COL4	0.048	TRUE	3
Day3	col3_6	Ec21	pOXA-48	COL4/COL4	0.048	TRUE	3
Day3	col1_5	Ec25	Empty	COL4/COL4	0.048	TRUE	3
Day3	col1_6	Ec25	Empty	COL4/COL4	0.048	TRUE	3
Day3	col2_5	Ec25	Empty	COL4/COL4	0.048	TRUE	3
Day3	col3_2	Ec25	Empty	COL4/COL4	0.048	TRUE	3
Day3	col3_3	Ec25	Empty	COL4/COL4	0.048	TRUE	3
Day3	col3_5	Ec25	Empty	COL4/COL4	0.048	TRUE	3
Day3	col1_1	Ec25	pOXA-48	COL4/COL4	0.048	TRUE	3
Day3	col1_4	Ec25	pOXA-48	COL4/COL4	0.048	TRUE	3
Day3	col2_8	Ec25	pOXA-48	COL4/COL4	0.048	TRUE	3
Day3	col3_7	Ec25	pOXA-48	COL4/COL4	0.048	TRUE	3
Day3	col3_8	Ec25	pOXA-48	COL4/COL4	0.048	TRUE	3
Day3	4_1	MG1655	Empty	AZI8/COL4	0.049	TRUE	3
Day3	3_1	MG1655	pOXA-48	AZI8/COL4	0.049	TRUE	3
Day3	2_8	MG1655	Empty	COL4/COL4	0.049	TRUE	3
Day3	5_8	MG1655	Empty	COL4/COL4	0.049	TRUE	3
Day2	col3_2	Ec10	pOXA-48	COL4/COL4	0.049	TRUE	2
Day2	col3_7	Ec10	pOXA-48	COL4/COL4	0.049	TRUE	2
Day2	col3_2	Ec10	pOXA-48	COL4/AZI8	0.049	TRUE	2
Day2	col3_7	Ec10	pOXA-48	COL4/AZI8	0.049	TRUE	2
Day2	col3_8	Ec25	pOXA-48	COL4/AZI8	0.049	TRUE	2
Day2	col3_8	Ec25	pOXA-48	COL4/COL4	0.049	TRUE	2
Day3	col1_7	Ec10	Empty	COL4/COL4	0.049	TRUE	3
Day3	col1_8	Ec10	Empty	COL4/COL4	0.049	TRUE	3
Day3	col2_1	Ec10	Empty	COL4/COL4	0.049	TRUE	3
Day3	col2_2	Ec10	Empty	COL4/COL4	0.049	TRUE	3
Day3	col2_3	Ec10	Empty	COL4/COL4	0.049	TRUE	3
Day3	col2_8	Ec10	Empty	COL4/COL4	0.049	TRUE	3
Day3	col1_2	Ec18	Empty	COL4/COL4	0.049	TRUE	3
Day3	col1_5	Ec18	Empty	COL4/COL4	0.049	TRUE	3
Day3	col1_6	Ec18	Empty	COL4/COL4	0.049	TRUE	3
Day3	col1_7	Ec18	Empty	COL4/COL4	0.049	TRUE	3
Day3	col2_8	Ec18	Empty	COL4/COL4	0.049	TRUE	3
Day3	col3_5	Ec18	Empty	COL4/COL4	0.049	TRUE	3
Day3	col1_1	Ec18	pOXA-48	COL4/COL4	0.049	TRUE	3
Day3	col1_2	Ec18	pOXA-48	COL4/COL4	0.049	TRUE	3
Day3	col1_7	Ec18	pOXA-48	COL4/COL4	0.049	TRUE	3
Day3	col2_4	Ec18	pOXA-48	COL4/COL4	0.049	TRUE	3
Day3	col3_1	Ec18	pOXA-48	COL4/COL4	0.049	TRUE	3
Day3	col3_4	Ec18	pOXA-48	COL4/COL4	0.049	TRUE	3
Day3	col3_7	Ec18	pOXA-48	COL4/COL4	0.049	TRUE	3
Day3	col1_6	Ec18	Empty	AZI8/COL4	0.049	TRUE	3
Day3	col1_8	Ec18	Empty	AZI8/COL4	0.049	TRUE	3
Day3	col2_3	Ec18	Empty	AZI8/COL4	0.049	TRUE	3
Day3	col2_5	Ec18	Empty	AZI8/COL4	0.049	TRUE	3
Day3	col2_8	Ec18	Empty	AZI8/COL4	0.049	TRUE	3
Day3	col3_2	Ec18	Empty	AZI8/COL4	0.049	TRUE	3
Day3	col1_4	Ec18	pOXA-48	AZI8/COL4	0.049	TRUE	3
Day3	col2_2	Ec18	pOXA-48	AZI8/COL4	0.049	TRUE	3
Day3	col2_5	Ec18	pOXA-48	AZI8/COL4	0.049	TRUE	3
Day3	col2_7	Ec18	pOXA-48	AZI8/COL4	0.049	TRUE	3
Day3	col2_8	Ec18	pOXA-48	AZI8/COL4	0.049	TRUE	3
Day3	col3_5	Ec18	pOXA-48	AZI8/COL4	0.049	TRUE	3
Day3	col3_7	Ec18	pOXA-48	AZI8/COL4	0.049	TRUE	3
Day3	col3_4	Ec18	pOXA-48	COL4/AZI8	0.049	TRUE	3
Day3	col1_1	Ec21	Empty	AZI8/COL4	0.049	TRUE	3
Day3	col1_4	Ec21	Empty	AZI8/COL4	0.049	TRUE	3
Day3	col1_5	Ec21	Empty	AZI8/COL4	0.049	TRUE	3
Day3	col1_6	Ec21	Empty	AZI8/COL4	0.049	TRUE	3
Day3	col1_8	Ec21	Empty	AZI8/COL4	0.049	TRUE	3
Day3	col2_2	Ec21	Empty	AZI8/COL4	0.049	TRUE	3
Day3	col2_7	Ec21	Empty	AZI8/COL4	0.049	TRUE	3
Day3	col3_1	Ec21	Empty	AZI8/COL4	0.049	TRUE	3
Day3	col3_7	Ec21	Empty	AZI8/COL4	0.049	TRUE	3
Day3	col3_8	Ec21	Empty	AZI8/COL4	0.049	TRUE	3
Day3	col1_1	Ec21	pOXA-48	AZI8/COL4	0.049	TRUE	3
Day3	col1_2	Ec21	pOXA-48	AZI8/COL4	0.049	TRUE	3
Day3	col1_8	Ec21	pOXA-48	AZI8/COL4	0.049	TRUE	3
Day3	col2_4	Ec21	pOXA-48	AZI8/COL4	0.049	TRUE	3
Day3	col2_5	Ec21	pOXA-48	AZI8/COL4	0.049	TRUE	3
Day3	col2_7	Ec21	pOXA-48	AZI8/COL4	0.049	TRUE	3
Day3	col2_8	Ec21	pOXA-48	AZI8/COL4	0.049	TRUE	3
Day3	col3_2	Ec21	pOXA-48	AZI8/COL4	0.049	TRUE	3
Day3	col3_7	Ec21	pOXA-48	AZI8/COL4	0.049	TRUE	3
Day3	col1_7	Ec25	Empty	AZI8/COL4	0.049	TRUE	3
Day3	col2_7	Ec25	Empty	AZI8/COL4	0.049	TRUE	3
Day3	col3_2	Ec25	Empty	AZI8/COL4	0.049	TRUE	3
Day3	col3_6	Ec25	Empty	AZI8/COL4	0.049	TRUE	3
Day3	col3_7	Ec25	Empty	AZI8/COL4	0.049	TRUE	3
Day3	col1_2	Ec25	pOXA-48	AZI8/COL4	0.049	TRUE	3
Day3	col1_4	Ec25	pOXA-48	AZI8/COL4	0.049	TRUE	3
Day3	col1_7	Ec25	pOXA-48	AZI8/COL4	0.049	TRUE	3
Day3	col2_3	Ec25	pOXA-48	AZI8/COL4	0.049	TRUE	3
Day3	col2_4	Ec25	pOXA-48	AZI8/COL4	0.049	TRUE	3
Day3	col2_5	Ec25	pOXA-48	AZI8/COL4	0.049	TRUE	3
Day3	col2_6	Ec25	pOXA-48	AZI8/COL4	0.049	TRUE	3
Day3	col2_8	Ec25	pOXA-48	AZI8/COL4	0.049	TRUE	3
Day3	col3_2	Ec25	pOXA-48	AZI8/COL4	0.049	TRUE	3
Day3	col3_4	Ec25	pOXA-48	AZI8/COL4	0.049	TRUE	3
Day3	col3_7	Ec25	pOXA-48	AZI8/COL4	0.049	TRUE	3
Day3	col1_4	Ec21	pOXA-48	COL4/AZI8	0.049	TRUE	3
Day3	col2_6	Ec25	pOXA-48	COL4/AZI8	0.049	TRUE	3
Day3	col1_2	Ec21	Empty	COL4/COL4	0.049	TRUE	3
Day3	col1_5	Ec21	Empty	COL4/COL4	0.049	TRUE	3
Day3	col1_8	Ec21	Empty	COL4/COL4	0.049	TRUE	3
Day3	col2_1	Ec21	Empty	COL4/COL4	0.049	TRUE	3
Day3	col2_3	Ec21	Empty	COL4/COL4	0.049	TRUE	3
Day3	col2_5	Ec21	Empty	COL4/COL4	0.049	TRUE	3
Day3	col2_6	Ec21	Empty	COL4/COL4	0.049	TRUE	3
Day3	col3_3	Ec21	Empty	COL4/COL4	0.049	TRUE	3
Day3	col3_7	Ec21	Empty	COL4/COL4	0.049	TRUE	3
Day3	col1_2	Ec21	pOXA-48	COL4/COL4	0.049	TRUE	3
Day3	col1_5	Ec21	pOXA-48	COL4/COL4	0.049	TRUE	3
Day3	col1_8	Ec21	pOXA-48	COL4/COL4	0.049	TRUE	3
Day3	col2_1	Ec21	pOXA-48	COL4/COL4	0.049	TRUE	3
Day3	col2_2	Ec21	pOXA-48	COL4/COL4	0.049	TRUE	3
Day3	col2_4	Ec21	pOXA-48	COL4/COL4	0.049	TRUE	3
Day3	col2_5	Ec21	pOXA-48	COL4/COL4	0.049	TRUE	3
Day3	col2_6	Ec21	pOXA-48	COL4/COL4	0.049	TRUE	3
Day3	col2_7	Ec21	pOXA-48	COL4/COL4	0.049	TRUE	3
Day3	col3_1	Ec21	pOXA-48	COL4/COL4	0.049	TRUE	3
Day3	col3_5	Ec21	pOXA-48	COL4/COL4	0.049	TRUE	3
Day3	col3_7	Ec21	pOXA-48	COL4/COL4	0.049	TRUE	3
Day3	col1_1	Ec25	Empty	COL4/COL4	0.049	TRUE	3
Day3	col1_2	Ec25	Empty	COL4/COL4	0.049	TRUE	3
Day3	col1_3	Ec25	Empty	COL4/COL4	0.049	TRUE	3
Day3	col1_4	Ec25	Empty	COL4/COL4	0.049	TRUE	3
Day3	col2_1	Ec25	Empty	COL4/COL4	0.049	TRUE	3
Day3	col3_4	Ec25	Empty	COL4/COL4	0.049	TRUE	3
Day3	col1_5	Ec25	pOXA-48	COL4/COL4	0.049	TRUE	3
Day3	col1_6	Ec25	pOXA-48	COL4/COL4	0.049	TRUE	3
Day3	col1_7	Ec25	pOXA-48	COL4/COL4	0.049	TRUE	3
Day3	col2_1	Ec25	pOXA-48	COL4/COL4	0.049	TRUE	3
Day3	col2_2	Ec25	pOXA-48	COL4/COL4	0.049	TRUE	3
Day3	col2_4	Ec25	pOXA-48	COL4/COL4	0.049	TRUE	3
Day3	col2_6	Ec25	pOXA-48	COL4/COL4	0.049	TRUE	3
Day3	col3_4	Ec25	pOXA-48	COL4/COL4	0.049	TRUE	3
Day2	1_4	MG1655	pOXA-48	COL4/COL4	0.05	TRUE	2
Day2	5_2	MG1655	pOXA-48	COL4/COL4	0.05	TRUE	2
Day2	1_4	MG1655	pOXA-48	COL4/AZI8	0.05	TRUE	2
Day2	5_2	MG1655	pOXA-48	COL4/AZI8	0.05	TRUE	2
Day3	5_3	MG1655	Empty	AZI8/COL4	0.05	TRUE	3
Day3	5_7	MG1655	Empty	COL4/COL4	0.05	TRUE	3
Day3	6_7	MG1655	Empty	COL4/COL4	0.05	TRUE	3
Day3	col1_3	Ec10	Empty	COL4/COL4	0.05	TRUE	3
Day3	col1_1	Ec18	Empty	COL4/COL4	0.05	TRUE	3
Day3	col1_4	Ec18	Empty	COL4/COL4	0.05	TRUE	3
Day3	col3_8	Ec18	Empty	COL4/COL4	0.05	TRUE	3
Day3	col2_8	Ec18	pOXA-48	COL4/COL4	0.05	TRUE	3
Day3	col3_6	Ec18	pOXA-48	COL4/COL4	0.05	TRUE	3
Day3	col1_1	Ec18	Empty	AZI8/COL4	0.05	TRUE	3
Day3	col1_2	Ec18	Empty	AZI8/COL4	0.05	TRUE	3
Day3	col1_3	Ec18	Empty	AZI8/COL4	0.05	TRUE	3
Day3	col1_1	Ec18	pOXA-48	AZI8/COL4	0.05	TRUE	3
Day3	col1_7	Ec18	pOXA-48	AZI8/COL4	0.05	TRUE	3
Day3	col2_3	Ec18	pOXA-48	AZI8/COL4	0.05	TRUE	3
Day3	col2_4	Ec18	pOXA-48	COL4/AZI8	0.05	TRUE	3
Day3	col1_2	Ec21	Empty	AZI8/COL4	0.05	TRUE	3
Day3	col1_7	Ec21	Empty	AZI8/COL4	0.05	TRUE	3
Day3	col1_7	Ec21	pOXA-48	AZI8/COL4	0.05	TRUE	3
Day3	col3_1	Ec25	Empty	AZI8/COL4	0.05	TRUE	3
Day3	col3_3	Ec25	Empty	AZI8/COL4	0.05	TRUE	3
Day3	col3_8	Ec25	Empty	AZI8/COL4	0.05	TRUE	3
Day3	col1_3	Ec25	pOXA-48	AZI8/COL4	0.05	TRUE	3
Day3	col3_5	Ec25	pOXA-48	AZI8/COL4	0.05	TRUE	3
Day3	col3_6	Ec25	pOXA-48	AZI8/COL4	0.05	TRUE	3
Day3	col3_8	Ec25	pOXA-48	AZI8/COL4	0.05	TRUE	3
Day3	col3_1	Ec25	pOXA-48	COL4/AZI8	0.05	TRUE	3
Day3	col3_8	Ec25	pOXA-48	COL4/AZI8	0.05	TRUE	3
Day3	col1_6	Ec21	Empty	COL4/COL4	0.05	TRUE	3
Day3	col1_7	Ec21	Empty	COL4/COL4	0.05	TRUE	3
Day3	col2_2	Ec21	Empty	COL4/COL4	0.05	TRUE	3
Day3	col2_7	Ec21	Empty	COL4/COL4	0.05	TRUE	3
Day3	col3_2	Ec21	Empty	COL4/COL4	0.05	TRUE	3
Day3	col3_6	Ec21	Empty	COL4/COL4	0.05	TRUE	3
Day3	col1_4	Ec21	pOXA-48	COL4/COL4	0.05	TRUE	3
Day3	col2_3	Ec21	pOXA-48	COL4/COL4	0.05	TRUE	3
Day3	col1_7	Ec25	Empty	COL4/COL4	0.05	TRUE	3
Day3	col1_8	Ec25	Empty	COL4/COL4	0.05	TRUE	3
Day3	col2_3	Ec25	Empty	COL4/COL4	0.05	TRUE	3
Day3	col2_4	Ec25	Empty	COL4/COL4	0.05	TRUE	3
Day3	col2_6	Ec25	Empty	COL4/COL4	0.05	TRUE	3
Day3	col2_7	Ec25	Empty	COL4/COL4	0.05	TRUE	3
Day3	col2_8	Ec25	Empty	COL4/COL4	0.05	TRUE	3
Day3	col3_1	Ec25	Empty	COL4/COL4	0.05	TRUE	3
Day3	col3_6	Ec25	Empty	COL4/COL4	0.05	TRUE	3
Day3	col3_7	Ec25	Empty	COL4/COL4	0.05	TRUE	3
Day3	col2_3	Ec25	pOXA-48	COL4/COL4	0.05	TRUE	3
Day3	col2_7	Ec25	pOXA-48	COL4/COL4	0.05	TRUE	3
Day3	col3_5	Ec25	pOXA-48	COL4/COL4	0.05	TRUE	3
Day3	col3_6	Ec25	pOXA-48	COL4/COL4	0.05	TRUE	3
Day2	1_1	MG1655	Empty	COL4/COL4	0.051	TRUE	2
Day2	2_1	MG1655	Empty	COL4/COL4	0.051	TRUE	2
Day2	2_5	MG1655	Empty	COL4/COL4	0.051	TRUE	2
Day2	3_5	MG1655	Empty	COL4/COL4	0.051	TRUE	2
Day2	5_1	MG1655	Empty	COL4/COL4	0.051	TRUE	2
Day2	1_1	MG1655	pOXA-48	COL4/COL4	0.051	TRUE	2
Day2	1_6	MG1655	pOXA-48	COL4/COL4	0.051	TRUE	2
Day2	2_2	MG1655	pOXA-48	COL4/COL4	0.051	TRUE	2
Day2	2_4	MG1655	pOXA-48	COL4/COL4	0.051	TRUE	2
Day2	3_1	MG1655	pOXA-48	COL4/COL4	0.051	TRUE	2
Day2	3_3	MG1655	pOXA-48	COL4/COL4	0.051	TRUE	2
Day2	3_4	MG1655	pOXA-48	COL4/COL4	0.051	TRUE	2
Day2	4_1	MG1655	pOXA-48	COL4/COL4	0.051	TRUE	2
Day2	4_2	MG1655	pOXA-48	COL4/COL4	0.051	TRUE	2
Day2	5_1	MG1655	pOXA-48	COL4/COL4	0.051	TRUE	2
Day2	1_1	MG1655	Empty	COL4/AZI8	0.051	TRUE	2
Day2	2_1	MG1655	Empty	COL4/AZI8	0.051	TRUE	2
Day2	2_5	MG1655	Empty	COL4/AZI8	0.051	TRUE	2
Day2	3_5	MG1655	Empty	COL4/AZI8	0.051	TRUE	2
Day2	5_1	MG1655	Empty	COL4/AZI8	0.051	TRUE	2
Day2	1_1	MG1655	pOXA-48	COL4/AZI8	0.051	TRUE	2
Day2	1_6	MG1655	pOXA-48	COL4/AZI8	0.051	TRUE	2
Day2	2_2	MG1655	pOXA-48	COL4/AZI8	0.051	TRUE	2
Day2	2_4	MG1655	pOXA-48	COL4/AZI8	0.051	TRUE	2
Day2	3_1	MG1655	pOXA-48	COL4/AZI8	0.051	TRUE	2
Day2	3_3	MG1655	pOXA-48	COL4/AZI8	0.051	TRUE	2
Day2	3_4	MG1655	pOXA-48	COL4/AZI8	0.051	TRUE	2
Day2	4_1	MG1655	pOXA-48	COL4/AZI8	0.051	TRUE	2
Day2	4_2	MG1655	pOXA-48	COL4/AZI8	0.051	TRUE	2
Day2	5_1	MG1655	pOXA-48	COL4/AZI8	0.051	TRUE	2
Day3	4_3	MG1655	Empty	AZI8/COL4	0.051	TRUE	3
Day3	col1_1	Ec10	Empty	COL4/COL4	0.051	TRUE	3
Day3	col2_4	Ec10	Empty	COL4/COL4	0.051	TRUE	3
Day3	col2_3	Ec18	Empty	COL4/COL4	0.051	TRUE	3
Day3	col3_3	Ec18	Empty	COL4/COL4	0.051	TRUE	3
Day3	col3_7	Ec18	Empty	COL4/COL4	0.051	TRUE	3
Day3	col1_4	Ec18	pOXA-48	COL4/COL4	0.051	TRUE	3
Day3	col2_2	Ec18	Empty	AZI8/COL4	0.051	TRUE	3
Day3	col2_7	Ec18	Empty	AZI8/COL4	0.051	TRUE	3
Day3	col1_3	Ec18	pOXA-48	AZI8/COL4	0.051	TRUE	3
Day3	col2_4	Ec18	pOXA-48	AZI8/COL4	0.051	TRUE	3
Day3	col3_8	Ec18	pOXA-48	AZI8/COL4	0.051	TRUE	3
Day3	col3_3	Ec18	pOXA-48	COL4/AZI8	0.051	TRUE	3
Day3	col1_3	Ec21	Empty	COL4/COL4	0.051	TRUE	3
Day3	col1_4	Ec21	Empty	COL4/COL4	0.051	TRUE	3
Day3	col2_8	Ec21	Empty	COL4/COL4	0.051	TRUE	3
Day3	col3_1	Ec21	Empty	COL4/COL4	0.051	TRUE	3
Day3	col3_4	Ec21	Empty	COL4/COL4	0.051	TRUE	3
Day3	col1_3	Ec21	pOXA-48	COL4/COL4	0.051	TRUE	3
Day3	col1_6	Ec21	pOXA-48	COL4/COL4	0.051	TRUE	3
Day3	col3_8	Ec25	Empty	COL4/COL4	0.051	TRUE	3
Day3	col1_2	Ec25	pOXA-48	COL4/COL4	0.051	TRUE	3
Day3	col3_2	Ec25	pOXA-48	COL4/COL4	0.051	TRUE	3
Day2	1_2	MG1655	Empty	COL4/COL4	0.052	TRUE	2
Day2	2_2	MG1655	Empty	COL4/COL4	0.052	TRUE	2
Day2	2_3	MG1655	Empty	COL4/COL4	0.052	TRUE	2
Day2	3_2	MG1655	Empty	COL4/COL4	0.052	TRUE	2
Day2	3_3	MG1655	Empty	COL4/COL4	0.052	TRUE	2
Day2	4_1	MG1655	Empty	COL4/COL4	0.052	TRUE	2
Day2	4_2	MG1655	Empty	COL4/COL4	0.052	TRUE	2
Day2	4_3	MG1655	Empty	COL4/COL4	0.052	TRUE	2
Day2	4_5	MG1655	Empty	COL4/COL4	0.052	TRUE	2
Day2	5_2	MG1655	Empty	COL4/COL4	0.052	TRUE	2
Day2	5_3	MG1655	Empty	COL4/COL4	0.052	TRUE	2
Day2	5_5	MG1655	Empty	COL4/COL4	0.052	TRUE	2
Day2	6_2	MG1655	Empty	COL4/COL4	0.052	TRUE	2
Day2	6_3	MG1655	Empty	COL4/COL4	0.052	TRUE	2
Day2	6_4	MG1655	Empty	COL4/COL4	0.052	TRUE	2
Day2	6_5	MG1655	Empty	COL4/COL4	0.052	TRUE	2
Day2	1_3	MG1655	pOXA-48	COL4/COL4	0.052	TRUE	2
Day2	1_5	MG1655	pOXA-48	COL4/COL4	0.052	TRUE	2
Day2	1_8	MG1655	pOXA-48	COL4/COL4	0.052	TRUE	2
Day2	2_5	MG1655	pOXA-48	COL4/COL4	0.052	TRUE	2
Day2	3_2	MG1655	pOXA-48	COL4/COL4	0.052	TRUE	2
Day2	4_4	MG1655	pOXA-48	COL4/COL4	0.052	TRUE	2
Day2	5_3	MG1655	pOXA-48	COL4/COL4	0.052	TRUE	2
Day2	5_4	MG1655	pOXA-48	COL4/COL4	0.052	TRUE	2
Day2	6_2	MG1655	pOXA-48	COL4/COL4	0.052	TRUE	2
Day2	6_3	MG1655	pOXA-48	COL4/COL4	0.052	TRUE	2
Day2	6_7	MG1655	pOXA-48	COL4/COL4	0.052	TRUE	2
Day2	1_2	MG1655	Empty	COL4/AZI8	0.052	TRUE	2
Day2	2_2	MG1655	Empty	COL4/AZI8	0.052	TRUE	2
Day2	2_3	MG1655	Empty	COL4/AZI8	0.052	TRUE	2
Day2	3_2	MG1655	Empty	COL4/AZI8	0.052	TRUE	2
Day2	3_3	MG1655	Empty	COL4/AZI8	0.052	TRUE	2
Day2	4_1	MG1655	Empty	COL4/AZI8	0.052	TRUE	2
Day2	4_2	MG1655	Empty	COL4/AZI8	0.052	TRUE	2
Day2	4_3	MG1655	Empty	COL4/AZI8	0.052	TRUE	2
Day2	4_5	MG1655	Empty	COL4/AZI8	0.052	TRUE	2
Day2	5_2	MG1655	Empty	COL4/AZI8	0.052	TRUE	2
Day2	5_3	MG1655	Empty	COL4/AZI8	0.052	TRUE	2
Day2	5_5	MG1655	Empty	COL4/AZI8	0.052	TRUE	2
Day2	6_2	MG1655	Empty	COL4/AZI8	0.052	TRUE	2
Day2	6_3	MG1655	Empty	COL4/AZI8	0.052	TRUE	2
Day2	6_4	MG1655	Empty	COL4/AZI8	0.052	TRUE	2
Day2	6_5	MG1655	Empty	COL4/AZI8	0.052	TRUE	2
Day2	1_3	MG1655	pOXA-48	COL4/AZI8	0.052	TRUE	2
Day2	1_5	MG1655	pOXA-48	COL4/AZI8	0.052	TRUE	2
Day2	1_8	MG1655	pOXA-48	COL4/AZI8	0.052	TRUE	2
Day2	2_5	MG1655	pOXA-48	COL4/AZI8	0.052	TRUE	2
Day2	3_2	MG1655	pOXA-48	COL4/AZI8	0.052	TRUE	2
Day2	4_4	MG1655	pOXA-48	COL4/AZI8	0.052	TRUE	2
Day2	5_3	MG1655	pOXA-48	COL4/AZI8	0.052	TRUE	2
Day2	5_4	MG1655	pOXA-48	COL4/AZI8	0.052	TRUE	2
Day2	6_2	MG1655	pOXA-48	COL4/AZI8	0.052	TRUE	2
Day2	6_3	MG1655	pOXA-48	COL4/AZI8	0.052	TRUE	2
Day2	6_7	MG1655	pOXA-48	COL4/AZI8	0.052	TRUE	2
Day3	3_3	MG1655	Empty	AZI8/COL4	0.052	TRUE	3
Day3	6_2	MG1655	Empty	AZI8/COL4	0.052	TRUE	3
Day3	col1_3	Ec18	Empty	COL4/COL4	0.052	TRUE	3
Day3	col3_2	Ec18	Empty	COL4/COL4	0.052	TRUE	3
Day3	col1_7	Ec18	Empty	AZI8/COL4	0.052	TRUE	3
Day3	col1_2	Ec18	pOXA-48	AZI8/COL4	0.052	TRUE	3
Day3	col1_6	Ec18	pOXA-48	AZI8/COL4	0.052	TRUE	3
Day3	col1_1	Ec21	Empty	COL4/COL4	0.052	TRUE	3
Day3	col2_4	Ec21	Empty	COL4/COL4	0.052	TRUE	3
Day3	col3_8	Ec21	Empty	COL4/COL4	0.052	TRUE	3
Day3	col1_7	Ec21	pOXA-48	COL4/COL4	0.052	TRUE	3
Day3	col3_1	Ec25	pOXA-48	COL4/COL4	0.052	TRUE	3
Day2	1_4	MG1655	Empty	COL4/COL4	0.053	TRUE	2
Day2	1_5	MG1655	Empty	COL4/COL4	0.053	TRUE	2
Day2	2_4	MG1655	Empty	COL4/COL4	0.053	TRUE	2
Day2	3_4	MG1655	Empty	COL4/COL4	0.053	TRUE	2
Day2	3_6	MG1655	Empty	COL4/COL4	0.053	TRUE	2
Day2	3_7	MG1655	Empty	COL4/COL4	0.053	TRUE	2
Day2	4_4	MG1655	Empty	COL4/COL4	0.053	TRUE	2
Day2	5_6	MG1655	Empty	COL4/COL4	0.053	TRUE	2
Day2	2_8	MG1655	pOXA-48	COL4/COL4	0.053	TRUE	2
Day2	4_5	MG1655	pOXA-48	COL4/COL4	0.053	TRUE	2
Day2	6_1	MG1655	pOXA-48	COL4/COL4	0.053	TRUE	2
Day2	6_6	MG1655	pOXA-48	COL4/COL4	0.053	TRUE	2
Day2	1_4	MG1655	Empty	COL4/AZI8	0.053	TRUE	2
Day2	1_5	MG1655	Empty	COL4/AZI8	0.053	TRUE	2
Day2	2_4	MG1655	Empty	COL4/AZI8	0.053	TRUE	2
Day2	3_4	MG1655	Empty	COL4/AZI8	0.053	TRUE	2
Day2	3_6	MG1655	Empty	COL4/AZI8	0.053	TRUE	2
Day2	3_7	MG1655	Empty	COL4/AZI8	0.053	TRUE	2
Day2	4_4	MG1655	Empty	COL4/AZI8	0.053	TRUE	2
Day2	5_6	MG1655	Empty	COL4/AZI8	0.053	TRUE	2
Day2	2_8	MG1655	pOXA-48	COL4/AZI8	0.053	TRUE	2
Day2	4_5	MG1655	pOXA-48	COL4/AZI8	0.053	TRUE	2
Day2	6_1	MG1655	pOXA-48	COL4/AZI8	0.053	TRUE	2
Day2	6_6	MG1655	pOXA-48	COL4/AZI8	0.053	TRUE	2
Day3	col3_5	Ec10	Empty	COL4/COL4	0.053	TRUE	3
Day3	col2_4	Ec18	Empty	COL4/COL4	0.053	TRUE	3
Day3	col1_8	Ec18	pOXA-48	COL4/COL4	0.053	TRUE	3
Day3	col3_5	Ec18	pOXA-48	COL4/AZI8	0.053	TRUE	3
Day3	col3_8	Ec21	pOXA-48	COL4/COL4	0.053	TRUE	3
Day3	col1_3	Ec25	pOXA-48	COL4/COL4	0.053	TRUE	3
Day3	col2_5	Ec25	pOXA-48	COL4/COL4	0.053	TRUE	3
Day2	1_2	MG1655	pOXA-48	COL4/COL4	0.054	TRUE	2
Day2	2_1	MG1655	pOXA-48	COL4/COL4	0.054	TRUE	2
Day2	2_3	MG1655	pOXA-48	COL4/COL4	0.054	TRUE	2
Day2	3_7	MG1655	pOXA-48	COL4/COL4	0.054	TRUE	2
Day2	4_8	MG1655	pOXA-48	COL4/COL4	0.054	TRUE	2
Day2	5_8	MG1655	pOXA-48	COL4/COL4	0.054	TRUE	2
Day2	1_2	MG1655	pOXA-48	COL4/AZI8	0.054	TRUE	2
Day2	2_1	MG1655	pOXA-48	COL4/AZI8	0.054	TRUE	2
Day2	2_3	MG1655	pOXA-48	COL4/AZI8	0.054	TRUE	2
Day2	3_7	MG1655	pOXA-48	COL4/AZI8	0.054	TRUE	2
Day2	4_8	MG1655	pOXA-48	COL4/AZI8	0.054	TRUE	2
Day2	5_8	MG1655	pOXA-48	COL4/AZI8	0.054	TRUE	2
Day3	col2_1	Ec25	pOXA-48	AZI8/COL4	0.054	TRUE	3
Day3	col1_1	Ec21	pOXA-48	COL4/COL4	0.054	TRUE	3
Day2	5_4	MG1655	Empty	COL4/COL4	0.055	TRUE	2
Day2	2_7	MG1655	pOXA-48	COL4/COL4	0.055	TRUE	2
Day2	4_3	MG1655	pOXA-48	COL4/COL4	0.055	TRUE	2
Day2	5_6	MG1655	pOXA-48	COL4/COL4	0.055	TRUE	2
Day2	5_4	MG1655	Empty	COL4/AZI8	0.055	TRUE	2
Day2	2_7	MG1655	pOXA-48	COL4/AZI8	0.055	TRUE	2
Day2	4_3	MG1655	pOXA-48	COL4/AZI8	0.055	TRUE	2
Day2	5_6	MG1655	pOXA-48	COL4/AZI8	0.055	TRUE	2
Day3	col1_8	Ec18	Empty	COL4/COL4	0.055	TRUE	3
Day3	col1_4	Ec18	Empty	AZI8/COL4	0.055	TRUE	3
Day3	col2_6	Ec18	Empty	AZI8/COL4	0.055	TRUE	3
Day3	col3_1	Ec18	Empty	AZI8/COL4	0.055	TRUE	3
Day2	2_6	MG1655	Empty	COL4/COL4	0.056	TRUE	2
Day2	2_6	MG1655	Empty	COL4/AZI8	0.056	TRUE	2
Day3	5_2	MG1655	Empty	AZI8/COL4	0.056	TRUE	3
Day3	6_3	MG1655	Empty	AZI8/COL4	0.056	TRUE	3
Day2	col2_7	Ec10	pOXA-48	COL4/COL4	0.056	TRUE	2
Day2	col2_7	Ec10	pOXA-48	COL4/AZI8	0.056	TRUE	2
Day3	col3_8	Ec10	Empty	COL4/COL4	0.056	TRUE	3
Day3	col2_3	Ec18	pOXA-48	COL4/COL4	0.056	TRUE	3
Day3	col2_6	Ec18	pOXA-48	COL4/COL4	0.056	TRUE	3
Day3	col1_8	Ec18	pOXA-48	AZI8/COL4	0.056	TRUE	3
Day3	col3_1	Ec25	pOXA-48	AZI8/COL4	0.056	TRUE	3
Day3	col1_8	Ec25	pOXA-48	COL4/COL4	0.056	TRUE	3
Day3	col3_3	Ec25	pOXA-48	COL4/COL4	0.056	TRUE	3
Day2	4_7	MG1655	Empty	COL4/COL4	0.057	TRUE	2
Day2	4_7	MG1655	Empty	COL4/AZI8	0.057	TRUE	2
Day3	2_1	MG1655	Empty	AZI8/COL4	0.057	TRUE	3
Day3	col2_5	Ec18	Empty	COL4/COL4	0.057	TRUE	3
Day3	col3_2	Ec18	pOXA-48	COL4/AZI8	0.057	TRUE	3
Day2	1_7	MG1655	pOXA-48	COL4/COL4	0.058	TRUE	2
Day2	1_7	MG1655	pOXA-48	COL4/AZI8	0.058	TRUE	2
Day3	6_6	MG1655	Empty	COL4/COL4	0.058	TRUE	3
Day3	6_7	MG1655	Empty	COL4/AZI8	0.058	TRUE	3
Day2	4_7	MG1655	pOXA-48	COL4/COL4	0.059	TRUE	2
Day2	4_7	MG1655	pOXA-48	COL4/AZI8	0.059	TRUE	2
Day2	col2_6	Ec25	pOXA-48	COL4/AZI8	0.059	TRUE	2
Day2	col2_6	Ec25	pOXA-48	COL4/COL4	0.059	TRUE	2
Day3	6_6	MG1655	Empty	COL4/AZI8	0.06	TRUE	3
Day2	2_7	MG1655	Empty	COL4/COL4	0.061	TRUE	2
Day2	4_6	MG1655	Empty	COL4/COL4	0.061	TRUE	2
Day2	2_7	MG1655	Empty	COL4/AZI8	0.061	TRUE	2
Day2	4_6	MG1655	Empty	COL4/AZI8	0.061	TRUE	2
Day3	6_4	MG1655	pOXA-48	COL4/COL4	0.061	TRUE	3
Day3	col2_2	Ec18	Empty	COL4/COL4	0.062	TRUE	3
Day3	3_2	MG1655	Empty	AZI8/COL4	0.063	TRUE	3
Day3	3_5	MG1655	pOXA-48	COL4/COL4	0.063	TRUE	3
Day3	col1_7	Ec10	Empty	COL4/AZI8	0.063	TRUE	3
Day3	col2_1	Ec18	pOXA-48	AZI8/COL4	0.063	TRUE	3
Day3	1_6	MG1655	Empty	COL4/COL4	0.064	TRUE	3
Day3	col1_4	Ec10	Empty	COL4/AZI8	0.065	TRUE	3
Day3	col2_6	Ec10	Empty	COL4/AZI8	0.065	TRUE	3
Day3	1_3	MG1655	Empty	AZI8/COL4	0.066	TRUE	3
Day3	col3_2	Ec10	Empty	COL4/AZI8	0.066	TRUE	3
Day3	col3_7	Ec10	Empty	COL4/AZI8	0.066	TRUE	3
Day3	2_2	MG1655	Empty	AZI8/COL4	0.067	TRUE	3
Day3	col1_8	Ec10	Empty	COL4/AZI8	0.067	TRUE	3
Day3	col2_7	Ec10	Empty	COL4/AZI8	0.067	TRUE	3
Day3	col3_4	Ec10	Empty	COL4/AZI8	0.067	TRUE	3
Day3	col1_2	Ec10	Empty	COL4/AZI8	0.068	TRUE	3
Day3	col2_2	Ec10	Empty	COL4/AZI8	0.068	TRUE	3
Day3	col2_5	Ec10	Empty	COL4/AZI8	0.068	TRUE	3
Day3	col3_3	Ec10	Empty	COL4/AZI8	0.068	TRUE	3
Day3	col3_6	Ec10	Empty	COL4/AZI8	0.068	TRUE	3
Day2	3_6	MG1655	pOXA-48	COL4/COL4	0.069	TRUE	2
Day2	3_6	MG1655	pOXA-48	COL4/AZI8	0.069	TRUE	2
Day3	col1_5	Ec10	Empty	COL4/AZI8	0.069	TRUE	3
Day3	col1_6	Ec10	Empty	COL4/AZI8	0.069	TRUE	3
Day3	col2_4	Ec10	Empty	COL4/AZI8	0.069	TRUE	3
Day3	col3_5	Ec10	Empty	COL4/AZI8	0.069	TRUE	3
Day3	1_2	MG1655	Empty	AZI8/COL4	0.07	TRUE	3
Day3	4_2	MG1655	Empty	AZI8/COL4	0.07	TRUE	3
Day3	col2_8	Ec10	Empty	COL4/AZI8	0.07	TRUE	3
Day3	col3_8	Ec10	Empty	COL4/AZI8	0.07	TRUE	3
Day3	col1_3	Ec10	Empty	COL4/AZI8	0.071	TRUE	3
Day3	col2_1	Ec10	Empty	COL4/AZI8	0.072	TRUE	3
Day3	6_5	MG1655	pOXA-48	COL4/COL4	0.073	TRUE	3
Day3	col3_1	Ec10	Empty	COL4/AZI8	0.074	TRUE	3
Day3	col3_5	Ec18	Empty	AZI8/COL4	0.075	TRUE	3
Day2	4_6	MG1655	pOXA-48	COL4/COL4	0.079	TRUE	2
Day2	4_6	MG1655	pOXA-48	COL4/AZI8	0.079	TRUE	2
Day2	3_8	MG1655	pOXA-48	COL4/COL4	0.084	TRUE	2
Day2	3_8	MG1655	pOXA-48	COL4/AZI8	0.084	TRUE	2
Day3	col2_3	Ec10	Empty	COL4/AZI8	0.087	TRUE	3
Day2	5_7	MG1655	pOXA-48	COL4/COL4	0.094	TRUE	2
Day2	5_7	MG1655	pOXA-48	COL4/AZI8	0.094	TRUE	2
Day3	3_5	MG1655	pOXA-48	COL4/AZI8	0.097	TRUE	3
Day3	1_4	MG1655	Empty	AZI8/COL4	0.105	TRUE	3
Day2	col1_3	Ec18	pOXA-48	COL4/COL4	0.111	TRUE	2
Day2	col1_3	Ec18	pOXA-48	COL4/AZI8	0.111	TRUE	2
Day3	col3_4	Ec21	pOXA-48	COL4/AZI8	0.116	TRUE	3
Day2	1_6	MG1655	pOXA-48	AZI8/AZI8	0.118	TRUE	2
Day2	1_6	MG1655	pOXA-48	AZI8/COL4	0.118	TRUE	2
Day2	2_6	MG1655	pOXA-48	AZI8/AZI8	0.12	TRUE	2
Day2	2_6	MG1655	pOXA-48	AZI8/COL4	0.12	TRUE	2
Day2	1_7	MG1655	pOXA-48	AZI8/AZI8	0.121	TRUE	2
Day2	1_7	MG1655	pOXA-48	AZI8/COL4	0.121	TRUE	2
Day2	1_5	MG1655	pOXA-48	AZI8/AZI8	0.123	TRUE	2
Day2	1_5	MG1655	pOXA-48	AZI8/COL4	0.123	TRUE	2
Day2	col3_3	Ec10	pOXA-48	COL4/COL4	0.123	TRUE	2
Day2	col3_3	Ec10	pOXA-48	COL4/AZI8	0.123	TRUE	2
Day2	4_7	MG1655	pOXA-48	AZI8/AZI8	0.127	TRUE	2
Day2	4_7	MG1655	pOXA-48	AZI8/COL4	0.127	TRUE	2
Day2	2_7	MG1655	pOXA-48	AZI8/AZI8	0.128	TRUE	2
Day2	3_6	MG1655	pOXA-48	AZI8/AZI8	0.128	TRUE	2
Day2	2_7	MG1655	pOXA-48	AZI8/COL4	0.128	TRUE	2
Day2	3_6	MG1655	pOXA-48	AZI8/COL4	0.128	TRUE	2
Day2	3_7	MG1655	pOXA-48	AZI8/AZI8	0.129	TRUE	2
Day2	3_7	MG1655	pOXA-48	AZI8/COL4	0.129	TRUE	2
Day2	1_4	MG1655	pOXA-48	AZI8/AZI8	0.13	TRUE	2
Day2	5_7	MG1655	pOXA-48	AZI8/AZI8	0.13	TRUE	2
Day2	1_4	MG1655	pOXA-48	AZI8/COL4	0.13	TRUE	2
Day2	5_7	MG1655	pOXA-48	AZI8/COL4	0.13	TRUE	2
Day2	2_7	MG1655	Empty	AZI8/AZI8	0.132	TRUE	2
Day2	2_7	MG1655	Empty	AZI8/COL4	0.132	TRUE	2
Day2	3_7	MG1655	Empty	AZI8/AZI8	0.133	TRUE	2
Day2	4_7	MG1655	Empty	AZI8/AZI8	0.133	TRUE	2
Day2	3_7	MG1655	Empty	AZI8/COL4	0.133	TRUE	2
Day2	4_7	MG1655	Empty	AZI8/COL4	0.133	TRUE	2
Day2	3_4	MG1655	pOXA-48	AZI8/AZI8	0.134	TRUE	2
Day2	3_4	MG1655	pOXA-48	AZI8/COL4	0.134	TRUE	2
Day2	3_1	MG1655	Empty	COL4/COL4	0.136	TRUE	2
Day2	3_1	MG1655	Empty	COL4/AZI8	0.136	TRUE	2
Day3	col1_1	Ec10	Empty	COL4/AZI8	0.137	TRUE	3
Day2	1_8	MG1655	pOXA-48	AZI8/AZI8	0.139	TRUE	2
Day2	1_8	MG1655	pOXA-48	AZI8/COL4	0.139	TRUE	2
Day2	2_5	MG1655	pOXA-48	AZI8/AZI8	0.14	TRUE	2
Day2	2_5	MG1655	pOXA-48	AZI8/COL4	0.14	TRUE	2
Day2	1_3	MG1655	Empty	COL4/COL4	0.14	TRUE	2
Day2	1_3	MG1655	Empty	COL4/AZI8	0.14	TRUE	2
Day2	5_6	MG1655	pOXA-48	AZI8/AZI8	0.141	TRUE	2
Day2	5_6	MG1655	pOXA-48	AZI8/COL4	0.141	TRUE	2
Day2	4_8	MG1655	Empty	AZI8/AZI8	0.142	TRUE	2
Day2	4_6	MG1655	pOXA-48	AZI8/AZI8	0.142	TRUE	2
Day2	4_8	MG1655	Empty	AZI8/COL4	0.142	TRUE	2
Day2	4_6	MG1655	pOXA-48	AZI8/COL4	0.142	TRUE	2
Day2	4_6	MG1655	Empty	AZI8/AZI8	0.143	TRUE	2
Day2	4_6	MG1655	Empty	AZI8/COL4	0.143	TRUE	2
Day2	2_8	MG1655	pOXA-48	AZI8/AZI8	0.144	TRUE	2
Day2	5_4	MG1655	pOXA-48	AZI8/AZI8	0.144	TRUE	2
Day2	2_8	MG1655	pOXA-48	AZI8/COL4	0.144	TRUE	2
Day2	5_4	MG1655	pOXA-48	AZI8/COL4	0.144	TRUE	2
Day2	3_8	MG1655	pOXA-48	AZI8/AZI8	0.145	TRUE	2
Day2	3_8	MG1655	pOXA-48	AZI8/COL4	0.145	TRUE	2
Day2	2_4	MG1655	pOXA-48	AZI8/AZI8	0.146	TRUE	2
Day2	2_4	MG1655	pOXA-48	AZI8/COL4	0.146	TRUE	2
Day3	6_1	MG1655	Empty	COL4/COL4	0.146	TRUE	3
Day2	3_5	MG1655	pOXA-48	AZI8/AZI8	0.148	TRUE	2
Day2	3_5	MG1655	pOXA-48	AZI8/COL4	0.148	TRUE	2
Day3	col3_8	Ec21	pOXA-48	COL4/AZI8	0.148	TRUE	3
Day2	1_8	MG1655	Empty	AZI8/AZI8	0.149	TRUE	2
Day2	2_8	MG1655	Empty	AZI8/AZI8	0.149	TRUE	2
Day2	6_7	MG1655	pOXA-48	AZI8/AZI8	0.149	TRUE	2
Day2	6_8	MG1655	pOXA-48	AZI8/AZI8	0.149	TRUE	2
Day2	1_8	MG1655	Empty	AZI8/COL4	0.149	TRUE	2
Day2	2_8	MG1655	Empty	AZI8/COL4	0.149	TRUE	2
Day2	6_7	MG1655	pOXA-48	AZI8/COL4	0.149	TRUE	2
Day2	6_8	MG1655	pOXA-48	AZI8/COL4	0.149	TRUE	2
Day2	6_8	MG1655	Empty	AZI8/AZI8	0.15	TRUE	2
Day2	6_8	MG1655	Empty	AZI8/COL4	0.15	TRUE	2
Day2	5_6	MG1655	Empty	AZI8/AZI8	0.151	TRUE	2
Day2	1_3	MG1655	pOXA-48	AZI8/AZI8	0.151	TRUE	2
Day2	4_4	MG1655	pOXA-48	AZI8/AZI8	0.151	TRUE	2
Day2	5_6	MG1655	Empty	AZI8/COL4	0.151	TRUE	2
Day2	1_3	MG1655	pOXA-48	AZI8/COL4	0.151	TRUE	2
Day2	4_4	MG1655	pOXA-48	AZI8/COL4	0.151	TRUE	2
Day2	5_8	MG1655	Empty	AZI8/AZI8	0.152	TRUE	2
Day2	5_8	MG1655	pOXA-48	AZI8/AZI8	0.152	TRUE	2
Day2	5_8	MG1655	Empty	AZI8/COL4	0.152	TRUE	2
Day2	5_8	MG1655	pOXA-48	AZI8/COL4	0.152	TRUE	2
Day2	3_8	MG1655	Empty	AZI8/AZI8	0.153	TRUE	2
Day2	5_7	MG1655	Empty	AZI8/AZI8	0.153	TRUE	2
Day2	3_8	MG1655	Empty	AZI8/COL4	0.153	TRUE	2
Day2	5_7	MG1655	Empty	AZI8/COL4	0.153	TRUE	2
Day2	4_5	MG1655	Empty	AZI8/AZI8	0.154	TRUE	2
Day2	5_5	MG1655	Empty	AZI8/AZI8	0.154	TRUE	2
Day2	4_8	MG1655	pOXA-48	AZI8/AZI8	0.154	TRUE	2
Day2	4_5	MG1655	Empty	AZI8/COL4	0.154	TRUE	2
Day2	5_5	MG1655	Empty	AZI8/COL4	0.154	TRUE	2
Day2	4_8	MG1655	pOXA-48	AZI8/COL4	0.154	TRUE	2
Day2	col3_1	Ec18	pOXA-48	COL4/COL4	0.155	TRUE	2
Day2	col3_1	Ec18	pOXA-48	COL4/AZI8	0.155	TRUE	2
Day2	3_6	MG1655	Empty	AZI8/AZI8	0.156	TRUE	2
Day2	6_6	MG1655	Empty	AZI8/AZI8	0.156	TRUE	2
Day2	6_7	MG1655	Empty	AZI8/AZI8	0.156	TRUE	2
Day2	3_6	MG1655	Empty	AZI8/COL4	0.156	TRUE	2
Day2	6_6	MG1655	Empty	AZI8/COL4	0.156	TRUE	2
Day2	6_7	MG1655	Empty	AZI8/COL4	0.156	TRUE	2
Day2	2_6	MG1655	Empty	AZI8/AZI8	0.161	TRUE	2
Day2	3_3	MG1655	pOXA-48	AZI8/AZI8	0.161	TRUE	2
Day2	4_5	MG1655	pOXA-48	AZI8/AZI8	0.161	TRUE	2
Day2	5_2	MG1655	pOXA-48	AZI8/AZI8	0.161	TRUE	2
Day2	2_6	MG1655	Empty	AZI8/COL4	0.161	TRUE	2
Day2	3_3	MG1655	pOXA-48	AZI8/COL4	0.161	TRUE	2
Day2	4_5	MG1655	pOXA-48	AZI8/COL4	0.161	TRUE	2
Day2	5_2	MG1655	pOXA-48	AZI8/COL4	0.161	TRUE	2
Day2	5_5	MG1655	pOXA-48	AZI8/AZI8	0.162	TRUE	2
Day2	5_5	MG1655	pOXA-48	AZI8/COL4	0.162	TRUE	2
Day2	1_2	MG1655	pOXA-48	AZI8/AZI8	0.164	TRUE	2
Day2	1_2	MG1655	pOXA-48	AZI8/COL4	0.164	TRUE	2
Day2	1_7	MG1655	Empty	COL4/COL4	0.164	TRUE	2
Day2	1_7	MG1655	Empty	COL4/AZI8	0.164	TRUE	2
Day3	5_2	MG1655	Empty	AZI8/AZI8	0.166	TRUE	3
Day3	6_2	MG1655	Empty	AZI8/AZI8	0.166	TRUE	3
Day2	2_5	MG1655	Empty	AZI8/AZI8	0.167	TRUE	2
Day2	6_4	MG1655	pOXA-48	AZI8/AZI8	0.167	TRUE	2
Day2	2_5	MG1655	Empty	AZI8/COL4	0.167	TRUE	2
Day2	6_4	MG1655	pOXA-48	AZI8/COL4	0.167	TRUE	2
Day2	col1_7	Ec18	pOXA-48	AZI8/AZI8	0.168	TRUE	2
Day2	col2_7	Ec18	pOXA-48	AZI8/AZI8	0.168	TRUE	2
Day2	col1_7	Ec18	pOXA-48	AZI8/COL4	0.168	TRUE	2
Day2	col2_7	Ec18	pOXA-48	AZI8/COL4	0.168	TRUE	2
Day2	2_3	MG1655	pOXA-48	AZI8/AZI8	0.169	TRUE	2
Day2	3_2	MG1655	pOXA-48	AZI8/AZI8	0.169	TRUE	2
Day2	2_3	MG1655	pOXA-48	AZI8/COL4	0.169	TRUE	2
Day2	3_2	MG1655	pOXA-48	AZI8/COL4	0.169	TRUE	2
Day2	2_6	MG1655	pOXA-48	COL4/COL4	0.169	TRUE	2
Day2	2_6	MG1655	pOXA-48	COL4/AZI8	0.169	TRUE	2
Day2	1_7	MG1655	Empty	AZI8/AZI8	0.17	TRUE	2
Day2	1_7	MG1655	Empty	AZI8/COL4	0.17	TRUE	2
Day2	5_3	MG1655	pOXA-48	AZI8/AZI8	0.171	TRUE	2
Day2	5_3	MG1655	pOXA-48	AZI8/COL4	0.171	TRUE	2
Day2	4_3	MG1655	pOXA-48	AZI8/AZI8	0.172	TRUE	2
Day2	4_3	MG1655	pOXA-48	AZI8/COL4	0.172	TRUE	2
Day2	3_5	MG1655	Empty	AZI8/AZI8	0.173	TRUE	2
Day2	6_6	MG1655	pOXA-48	AZI8/AZI8	0.173	TRUE	2
Day2	3_5	MG1655	Empty	AZI8/COL4	0.173	TRUE	2
Day2	6_6	MG1655	pOXA-48	AZI8/COL4	0.173	TRUE	2
Day2	col1_3	Ec18	pOXA-48	AZI8/AZI8	0.173	TRUE	2
Day2	col1_3	Ec18	pOXA-48	AZI8/COL4	0.173	TRUE	2
Day2	5_1	MG1655	pOXA-48	AZI8/AZI8	0.174	TRUE	2
Day2	5_1	MG1655	pOXA-48	AZI8/COL4	0.174	TRUE	2
Day3	col1_2	Ec10	Empty	COL4/COL4	0.174	TRUE	3
Day2	4_2	MG1655	pOXA-48	AZI8/AZI8	0.175	TRUE	2
Day2	4_2	MG1655	pOXA-48	AZI8/COL4	0.175	TRUE	2
Day2	col1_6	Ec18	pOXA-48	AZI8/AZI8	0.175	TRUE	2
Day2	col1_6	Ec18	pOXA-48	AZI8/COL4	0.175	TRUE	2
Day2	1_6	MG1655	Empty	AZI8/AZI8	0.176	TRUE	2
Day2	6_5	MG1655	Empty	AZI8/AZI8	0.176	TRUE	2
Day2	1_6	MG1655	Empty	AZI8/COL4	0.176	TRUE	2
Day2	6_5	MG1655	Empty	AZI8/COL4	0.176	TRUE	2
Day2	2_2	MG1655	pOXA-48	AZI8/AZI8	0.178	TRUE	2
Day2	2_2	MG1655	pOXA-48	AZI8/COL4	0.178	TRUE	2
Day3	5_7	MG1655	Empty	COL4/AZI8	0.178	TRUE	3
Day3	6_4	MG1655	pOXA-48	COL4/AZI8	0.178	TRUE	3
Day2	6_2	MG1655	pOXA-48	AZI8/AZI8	0.179	TRUE	2
Day2	6_2	MG1655	pOXA-48	AZI8/COL4	0.179	TRUE	2
Day2	col1_7	Ec21	pOXA-48	AZI8/AZI8	0.18	TRUE	2
Day2	col1_7	Ec21	pOXA-48	AZI8/COL4	0.18	TRUE	2
Day2	col1_2	Ec18	pOXA-48	AZI8/AZI8	0.181	TRUE	2
Day2	col1_2	Ec18	pOXA-48	AZI8/COL4	0.181	TRUE	2
Day3	col2_2	Ec21	pOXA-48	COL4/AZI8	0.181	TRUE	3
Day2	6_4	MG1655	Empty	AZI8/AZI8	0.182	TRUE	2
Day2	4_1	MG1655	pOXA-48	AZI8/AZI8	0.182	TRUE	2
Day2	6_3	MG1655	pOXA-48	AZI8/AZI8	0.182	TRUE	2
Day2	6_4	MG1655	Empty	AZI8/COL4	0.182	TRUE	2
Day2	4_1	MG1655	pOXA-48	AZI8/COL4	0.182	TRUE	2
Day2	6_3	MG1655	pOXA-48	AZI8/COL4	0.182	TRUE	2
Day3	col3_2	Ec21	pOXA-48	COL4/AZI8	0.182	TRUE	3
Day2	2_4	MG1655	Empty	AZI8/AZI8	0.184	TRUE	2
Day2	1_1	MG1655	pOXA-48	AZI8/AZI8	0.184	TRUE	2
Day2	6_5	MG1655	pOXA-48	AZI8/AZI8	0.184	TRUE	2
Day2	2_4	MG1655	Empty	AZI8/COL4	0.184	TRUE	2
Day2	1_1	MG1655	pOXA-48	AZI8/COL4	0.184	TRUE	2
Day2	6_5	MG1655	pOXA-48	AZI8/COL4	0.184	TRUE	2
Day2	col2_2	Ec18	pOXA-48	AZI8/AZI8	0.184	TRUE	2
Day2	col2_2	Ec18	pOXA-48	AZI8/COL4	0.184	TRUE	2
Day2	col1_7	Ec18	Empty	AZI8/AZI8	0.187	TRUE	2
Day2	col1_7	Ec18	Empty	AZI8/COL4	0.187	TRUE	2
Day2	6_1	MG1655	pOXA-48	AZI8/AZI8	0.188	TRUE	2
Day2	6_1	MG1655	pOXA-48	AZI8/COL4	0.188	TRUE	2
Day2	col1_5	Ec18	pOXA-48	AZI8/AZI8	0.188	TRUE	2
Day2	col2_3	Ec18	pOXA-48	AZI8/AZI8	0.188	TRUE	2
Day2	col3_4	Ec18	pOXA-48	AZI8/AZI8	0.188	TRUE	2
Day2	col1_5	Ec18	pOXA-48	AZI8/COL4	0.188	TRUE	2
Day2	col2_3	Ec18	pOXA-48	AZI8/COL4	0.188	TRUE	2
Day2	col3_4	Ec18	pOXA-48	AZI8/COL4	0.188	TRUE	2
Day2	col3_7	Ec18	pOXA-48	AZI8/AZI8	0.189	TRUE	2
Day2	col3_7	Ec18	pOXA-48	AZI8/COL4	0.189	TRUE	2
Day2	col1_8	Ec18	pOXA-48	AZI8/AZI8	0.19	TRUE	2
Day2	col3_3	Ec18	pOXA-48	AZI8/AZI8	0.19	TRUE	2
Day2	col1_8	Ec18	pOXA-48	AZI8/COL4	0.19	TRUE	2
Day2	col3_3	Ec18	pOXA-48	AZI8/COL4	0.19	TRUE	2
Day2	col3_5	Ec18	pOXA-48	AZI8/AZI8	0.191	TRUE	2
Day2	col3_5	Ec18	pOXA-48	AZI8/COL4	0.191	TRUE	2
Day2	4_4	MG1655	Empty	AZI8/AZI8	0.192	TRUE	2
Day2	5_4	MG1655	Empty	AZI8/AZI8	0.192	TRUE	2
Day2	4_4	MG1655	Empty	AZI8/COL4	0.192	TRUE	2
Day2	5_4	MG1655	Empty	AZI8/COL4	0.192	TRUE	2
Day2	1_5	MG1655	Empty	AZI8/AZI8	0.193	TRUE	2
Day2	3_4	MG1655	Empty	AZI8/AZI8	0.193	TRUE	2
Day2	1_5	MG1655	Empty	AZI8/COL4	0.193	TRUE	2
Day2	3_4	MG1655	Empty	AZI8/COL4	0.193	TRUE	2
Day3	3_2	MG1655	Empty	AZI8/AZI8	0.193	TRUE	3
Day3	3_1	MG1655	Empty	AZI8/AZI8	0.194	TRUE	3
Day2	col2_1	Ec18	pOXA-48	AZI8/AZI8	0.194	TRUE	2
Day2	col3_6	Ec18	pOXA-48	AZI8/AZI8	0.194	TRUE	2
Day2	col2_1	Ec18	pOXA-48	AZI8/COL4	0.194	TRUE	2
Day2	col3_6	Ec18	pOXA-48	AZI8/COL4	0.194	TRUE	2
Day2	col2_6	Ec21	pOXA-48	AZI8/AZI8	0.196	TRUE	2
Day2	col2_6	Ec21	pOXA-48	AZI8/COL4	0.196	TRUE	2
Day2	2_1	MG1655	pOXA-48	AZI8/AZI8	0.197	TRUE	2
Day2	2_1	MG1655	pOXA-48	AZI8/COL4	0.197	TRUE	2
Day2	col2_6	Ec18	pOXA-48	AZI8/AZI8	0.197	TRUE	2
Day2	col3_2	Ec18	pOXA-48	AZI8/AZI8	0.197	TRUE	2
Day2	col2_6	Ec18	pOXA-48	AZI8/COL4	0.197	TRUE	2
Day2	col3_2	Ec18	pOXA-48	AZI8/COL4	0.197	TRUE	2
Day3	3_3	MG1655	Empty	AZI8/AZI8	0.198	TRUE	3
Day3	5_3	MG1655	Empty	AZI8/AZI8	0.198	TRUE	3
Day2	col2_4	Ec18	pOXA-48	AZI8/AZI8	0.198	TRUE	2
Day2	col2_4	Ec18	pOXA-48	AZI8/COL4	0.198	TRUE	2
Day2	2_3	MG1655	Empty	AZI8/AZI8	0.199	TRUE	2
Day2	2_3	MG1655	Empty	AZI8/COL4	0.199	TRUE	2
Day2	col1_1	Ec18	pOXA-48	AZI8/AZI8	0.199	TRUE	2
Day2	col1_1	Ec18	pOXA-48	AZI8/COL4	0.199	TRUE	2
Day2	col1_1	Ec21	Empty	AZI8/AZI8	0.199	TRUE	2
Day2	col1_5	Ec21	pOXA-48	AZI8/AZI8	0.199	TRUE	2
Day2	col1_1	Ec21	Empty	AZI8/COL4	0.199	TRUE	2
Day2	col1_5	Ec21	pOXA-48	AZI8/COL4	0.199	TRUE	2
Day2	5_5	MG1655	pOXA-48	COL4/COL4	0.2	TRUE	2
Day2	5_5	MG1655	pOXA-48	COL4/AZI8	0.2	TRUE	2
Day3	6_8	MG1655	Empty	COL4/AZI8	0.201	FALSE	3
Day3	col1_6	Ec21	Empty	COL4/AZI8	0.201	FALSE	3
Day3	col1_2	Ec21	Empty	COL4/AZI8	0.202	FALSE	3
Day3	col1_8	Ec21	pOXA-48	COL4/AZI8	0.202	FALSE	3
Day3	6_5	MG1655	pOXA-48	COL4/AZI8	0.203	FALSE	3
Day3	col1_3	Ec21	Empty	COL4/AZI8	0.203	FALSE	3
Day2	3_1	MG1655	pOXA-48	AZI8/AZI8	0.204	FALSE	2
Day2	3_1	MG1655	pOXA-48	AZI8/COL4	0.204	FALSE	2
Day2	6_7	MG1655	Empty	COL4/COL4	0.204	FALSE	2
Day2	6_7	MG1655	Empty	COL4/AZI8	0.204	FALSE	2
Day3	6_8	MG1655	pOXA-48	COL4/AZI8	0.204	FALSE	3
Day2	col1_2	Ec18	pOXA-48	COL4/COL4	0.204	FALSE	2
Day2	col3_3	Ec18	Empty	AZI8/AZI8	0.204	FALSE	2
Day2	col3_3	Ec18	Empty	AZI8/COL4	0.204	FALSE	2
Day2	col1_2	Ec18	pOXA-48	COL4/AZI8	0.204	FALSE	2
Day2	col3_5	Ec21	pOXA-48	AZI8/AZI8	0.204	FALSE	2
Day2	col3_5	Ec21	pOXA-48	AZI8/COL4	0.204	FALSE	2
Day3	4_8	MG1655	Empty	COL4/AZI8	0.205	FALSE	3
Day2	col2_5	Ec21	pOXA-48	AZI8/AZI8	0.205	FALSE	2
Day2	col2_5	Ec21	pOXA-48	AZI8/COL4	0.205	FALSE	2
Day2	6_3	MG1655	Empty	AZI8/AZI8	0.206	FALSE	2
Day2	6_3	MG1655	Empty	AZI8/COL4	0.206	FALSE	2
Day2	col1_4	Ec18	pOXA-48	AZI8/AZI8	0.206	FALSE	2
Day2	col1_4	Ec18	pOXA-48	AZI8/COL4	0.206	FALSE	2
Day2	3_3	MG1655	Empty	AZI8/AZI8	0.207	FALSE	2
Day2	3_3	MG1655	Empty	AZI8/COL4	0.207	FALSE	2
Day3	3_1	MG1655	pOXA-48	AZI8/AZI8	0.207	FALSE	3
Day3	1_6	MG1655	Empty	COL4/AZI8	0.207	FALSE	3
Day2	col1_6	Ec21	pOXA-48	AZI8/AZI8	0.207	FALSE	2
Day2	col1_6	Ec21	pOXA-48	AZI8/COL4	0.207	FALSE	2
Day3	col1_4	Ec21	Empty	COL4/AZI8	0.207	FALSE	3
Day2	col2_5	Ec18	pOXA-48	COL4/COL4	0.208	FALSE	2
Day2	col3_5	Ec18	Empty	AZI8/AZI8	0.208	FALSE	2
Day2	col3_5	Ec18	Empty	AZI8/COL4	0.208	FALSE	2
Day2	col2_5	Ec18	pOXA-48	COL4/AZI8	0.208	FALSE	2
Day2	col3_1	Ec21	pOXA-48	AZI8/AZI8	0.208	FALSE	2
Day2	col3_1	Ec21	pOXA-48	AZI8/COL4	0.208	FALSE	2
Day2	5_3	MG1655	Empty	AZI8/AZI8	0.209	FALSE	2
Day2	5_3	MG1655	Empty	AZI8/COL4	0.209	FALSE	2
Day2	col1_8	Ec18	Empty	AZI8/AZI8	0.209	FALSE	2
Day2	col2_8	Ec18	pOXA-48	AZI8/AZI8	0.209	FALSE	2
Day2	col1_8	Ec18	Empty	AZI8/COL4	0.209	FALSE	2
Day2	col2_8	Ec18	pOXA-48	AZI8/COL4	0.209	FALSE	2
Day2	col1_3	Ec21	Empty	AZI8/AZI8	0.21	FALSE	2
Day2	col1_3	Ec21	Empty	AZI8/COL4	0.21	FALSE	2
Day3	2_1	MG1655	Empty	AZI8/AZI8	0.211	FALSE	3
Day2	col2_5	Ec18	pOXA-48	AZI8/AZI8	0.212	FALSE	2
Day2	col2_5	Ec18	pOXA-48	AZI8/COL4	0.212	FALSE	2
Day3	col2_2	Ec21	Empty	COL4/AZI8	0.212	FALSE	3
Day2	6_2	MG1655	Empty	AZI8/AZI8	0.213	FALSE	2
Day2	6_2	MG1655	Empty	AZI8/COL4	0.213	FALSE	2
Day2	1_6	MG1655	Empty	COL4/COL4	0.214	FALSE	2
Day2	1_6	MG1655	Empty	COL4/AZI8	0.214	FALSE	2
Day3	3_8	MG1655	Empty	COL4/AZI8	0.214	FALSE	3
Day3	col2_8	Ec21	pOXA-48	COL4/AZI8	0.214	FALSE	3
Day2	col3_8	Ec21	Empty	AZI8/AZI8	0.216	FALSE	2
Day2	col2_8	Ec21	pOXA-48	AZI8/AZI8	0.216	FALSE	2
Day2	col3_8	Ec21	Empty	AZI8/COL4	0.216	FALSE	2
Day2	col2_8	Ec21	pOXA-48	AZI8/COL4	0.216	FALSE	2
Day3	col1_2	Ec21	pOXA-48	COL4/AZI8	0.216	FALSE	3
Day3	col3_3	Ec21	pOXA-48	COL4/AZI8	0.216	FALSE	3
Day2	2_2	MG1655	Empty	AZI8/AZI8	0.218	FALSE	2
Day2	4_2	MG1655	Empty	AZI8/AZI8	0.218	FALSE	2
Day2	2_2	MG1655	Empty	AZI8/COL4	0.218	FALSE	2
Day2	4_2	MG1655	Empty	AZI8/COL4	0.218	FALSE	2
Day3	col1_1	Ec21	pOXA-48	COL4/AZI8	0.218	FALSE	3
Day2	col1_6	Ec21	Empty	AZI8/AZI8	0.219	FALSE	2
Day2	col1_6	Ec21	Empty	AZI8/COL4	0.219	FALSE	2
Day2	6_8	MG1655	pOXA-48	COL4/COL4	0.22	FALSE	2
Day2	6_8	MG1655	pOXA-48	COL4/AZI8	0.22	FALSE	2
Day3	1_8	MG1655	Empty	COL4/AZI8	0.22	FALSE	3
Day2	col1_4	Ec21	Empty	AZI8/AZI8	0.22	FALSE	2
Day2	col3_7	Ec21	pOXA-48	AZI8/AZI8	0.22	FALSE	2
Day2	col1_4	Ec21	Empty	AZI8/COL4	0.22	FALSE	2
Day2	col3_7	Ec21	pOXA-48	AZI8/COL4	0.22	FALSE	2
Day3	col1_5	Ec21	Empty	COL4/AZI8	0.22	FALSE	3
Day3	col1_5	Ec21	pOXA-48	COL4/AZI8	0.22	FALSE	3
Day3	5_8	MG1655	Empty	COL4/AZI8	0.221	FALSE	3
Day2	col1_1	Ec21	pOXA-48	AZI8/AZI8	0.221	FALSE	2
Day2	col3_6	Ec21	pOXA-48	AZI8/AZI8	0.221	FALSE	2
Day2	col1_1	Ec21	pOXA-48	AZI8/COL4	0.221	FALSE	2
Day2	col3_6	Ec21	pOXA-48	AZI8/COL4	0.221	FALSE	2
Day2	4_3	MG1655	Empty	AZI8/AZI8	0.222	FALSE	2
Day2	4_3	MG1655	Empty	AZI8/COL4	0.222	FALSE	2
Day3	4_3	MG1655	Empty	AZI8/AZI8	0.223	FALSE	3
Day2	col1_8	Ec21	pOXA-48	AZI8/AZI8	0.223	FALSE	2
Day2	col1_8	Ec21	pOXA-48	AZI8/COL4	0.223	FALSE	2
Day2	col2_7	Ec21	Empty	AZI8/AZI8	0.225	FALSE	2
Day2	col2_1	Ec21	pOXA-48	AZI8/AZI8	0.225	FALSE	2
Day2	col2_7	Ec21	Empty	AZI8/COL4	0.225	FALSE	2
Day2	col2_1	Ec21	pOXA-48	AZI8/COL4	0.225	FALSE	2
Day2	col1_3	Ec21	pOXA-48	AZI8/AZI8	0.226	FALSE	2
Day2	col1_3	Ec21	pOXA-48	AZI8/COL4	0.226	FALSE	2
Day2	col1_5	Ec18	Empty	AZI8/AZI8	0.227	FALSE	2
Day2	col3_6	Ec18	Empty	AZI8/AZI8	0.227	FALSE	2
Day2	col1_5	Ec18	Empty	AZI8/COL4	0.227	FALSE	2
Day2	col3_6	Ec18	Empty	AZI8/COL4	0.227	FALSE	2
Day3	col1_7	Ec21	pOXA-48	COL4/AZI8	0.227	FALSE	3
Day2	col1_3	Ec18	Empty	AZI8/AZI8	0.228	FALSE	2
Day2	col2_6	Ec18	Empty	AZI8/AZI8	0.228	FALSE	2
Day2	col1_3	Ec18	Empty	AZI8/COL4	0.228	FALSE	2
Day2	col2_6	Ec18	Empty	AZI8/COL4	0.228	FALSE	2
Day2	3_2	MG1655	Empty	AZI8/AZI8	0.229	FALSE	2
Day2	5_2	MG1655	Empty	AZI8/AZI8	0.229	FALSE	2
Day2	3_2	MG1655	Empty	AZI8/COL4	0.229	FALSE	2
Day2	5_2	MG1655	Empty	AZI8/COL4	0.229	FALSE	2
Day3	col2_3	Ec21	pOXA-48	COL4/AZI8	0.229	FALSE	3
Day2	4_1	MG1655	Empty	AZI8/AZI8	0.23	FALSE	2
Day2	4_1	MG1655	Empty	AZI8/COL4	0.23	FALSE	2
Day2	col3_4	Ec18	Empty	AZI8/AZI8	0.23	FALSE	2
Day2	col3_1	Ec18	pOXA-48	AZI8/AZI8	0.23	FALSE	2
Day2	col3_4	Ec18	Empty	AZI8/COL4	0.23	FALSE	2
Day2	col3_1	Ec18	pOXA-48	AZI8/COL4	0.23	FALSE	2
Day3	2_8	MG1655	Empty	COL4/AZI8	0.231	FALSE	3
Day2	col2_2	Ec18	pOXA-48	COL4/COL4	0.231	FALSE	2
Day2	col2_2	Ec18	pOXA-48	COL4/AZI8	0.231	FALSE	2
Day3	2_2	MG1655	Empty	AZI8/AZI8	0.233	FALSE	3
Day2	col1_7	Ec21	Empty	AZI8/AZI8	0.233	FALSE	2
Day2	col1_7	Ec21	Empty	AZI8/COL4	0.233	FALSE	2
Day2	col2_1	Ec21	Empty	AZI8/AZI8	0.235	FALSE	2
Day2	col2_1	Ec21	Empty	AZI8/COL4	0.235	FALSE	2
Day2	col3_8	Ec18	pOXA-48	AZI8/AZI8	0.236	FALSE	2
Day2	col3_8	Ec18	pOXA-48	AZI8/COL4	0.236	FALSE	2
Day2	col3_3	Ec21	pOXA-48	AZI8/AZI8	0.237	FALSE	2
Day2	col3_3	Ec21	pOXA-48	AZI8/COL4	0.237	FALSE	2
Day3	col2_5	Ec21	pOXA-48	COL4/AZI8	0.237	FALSE	3
Day3	6_1	MG1655	Empty	COL4/AZI8	0.238	FALSE	3
Day2	col1_7	Ec21	pOXA-48	COL4/AZI8	0.238	FALSE	2
Day2	col1_7	Ec21	pOXA-48	COL4/COL4	0.238	FALSE	2
Day3	col3_5	Ec21	pOXA-48	COL4/AZI8	0.238	FALSE	3
Day2	col3_2	Ec21	pOXA-48	AZI8/AZI8	0.239	FALSE	2
Day2	col3_2	Ec21	pOXA-48	AZI8/COL4	0.239	FALSE	2
Day3	col1_7	Ec21	Empty	COL4/AZI8	0.239	FALSE	3
Day2	col2_8	Ec18	Empty	AZI8/AZI8	0.24	FALSE	2
Day2	col2_8	Ec18	Empty	AZI8/COL4	0.24	FALSE	2
Day2	col2_2	Ec21	pOXA-48	AZI8/AZI8	0.24	FALSE	2
Day2	col2_2	Ec21	pOXA-48	AZI8/COL4	0.24	FALSE	2
Day3	col3_2	Ec21	Empty	COL4/AZI8	0.24	FALSE	3
Day2	1_4	MG1655	Empty	AZI8/AZI8	0.241	FALSE	2
Day2	1_4	MG1655	Empty	AZI8/COL4	0.241	FALSE	2
Day3	1_2	MG1655	Empty	AZI8/AZI8	0.241	FALSE	3
Day2	col3_7	Ec18	Empty	AZI8/AZI8	0.241	FALSE	2
Day2	col3_8	Ec18	Empty	AZI8/AZI8	0.241	FALSE	2
Day2	col3_7	Ec18	Empty	AZI8/COL4	0.241	FALSE	2
Day2	col3_8	Ec18	Empty	AZI8/COL4	0.241	FALSE	2
Day2	col3_1	Ec21	Empty	AZI8/AZI8	0.241	FALSE	2
Day2	col3_1	Ec21	Empty	AZI8/COL4	0.241	FALSE	2
Day2	3_8	MG1655	Empty	COL4/COL4	0.242	FALSE	2
Day2	3_8	MG1655	Empty	COL4/AZI8	0.242	FALSE	2
Day2	col2_5	Ec18	Empty	AZI8/AZI8	0.242	FALSE	2
Day2	col2_5	Ec18	Empty	AZI8/COL4	0.242	FALSE	2
Day2	col3_8	Ec21	pOXA-48	AZI8/AZI8	0.242	FALSE	2
Day2	col3_8	Ec21	pOXA-48	AZI8/COL4	0.242	FALSE	2
Day3	col1_1	Ec21	Empty	COL4/AZI8	0.242	FALSE	3
Day3	col3_1	Ec21	pOXA-48	COL4/AZI8	0.242	FALSE	3
Day2	1_3	MG1655	Empty	AZI8/AZI8	0.243	FALSE	2
Day2	1_3	MG1655	Empty	AZI8/COL4	0.243	FALSE	2
Day3	6_3	MG1655	Empty	AZI8/AZI8	0.243	FALSE	3
Day2	col2_3	Ec18	Empty	AZI8/AZI8	0.243	FALSE	2
Day2	col2_3	Ec18	Empty	AZI8/COL4	0.243	FALSE	2
Day2	1_1	MG1655	Empty	AZI8/AZI8	0.245	FALSE	2
Day2	1_1	MG1655	Empty	AZI8/COL4	0.245	FALSE	2
Day2	col1_1	Ec18	pOXA-48	COL4/COL4	0.245	FALSE	2
Day2	col1_1	Ec18	pOXA-48	COL4/AZI8	0.245	FALSE	2
Day2	6_1	MG1655	Empty	AZI8/AZI8	0.246	FALSE	2
Day2	6_1	MG1655	Empty	AZI8/COL4	0.246	FALSE	2
Day3	6_1	MG1655	Empty	AZI8/AZI8	0.246	FALSE	3
Day2	col2_2	Ec21	Empty	AZI8/AZI8	0.246	FALSE	2
Day2	col2_4	Ec21	pOXA-48	AZI8/AZI8	0.246	FALSE	2
Day2	col2_2	Ec21	Empty	AZI8/COL4	0.246	FALSE	2
Day2	col2_4	Ec21	pOXA-48	AZI8/COL4	0.246	FALSE	2
Day3	col1_8	Ec21	Empty	COL4/AZI8	0.246	FALSE	3
Day2	col3_7	Ec21	Empty	AZI8/AZI8	0.247	FALSE	2
Day2	col3_7	Ec21	Empty	AZI8/COL4	0.247	FALSE	2
Day2	col3_5	Ec21	Empty	AZI8/AZI8	0.248	FALSE	2
Day2	col3_5	Ec21	Empty	AZI8/COL4	0.248	FALSE	2
Day2	2_1	MG1655	Empty	AZI8/AZI8	0.249	FALSE	2
Day2	2_1	MG1655	Empty	AZI8/COL4	0.249	FALSE	2
Day2	3_1	MG1655	Empty	AZI8/AZI8	0.251	FALSE	2
Day2	3_1	MG1655	Empty	AZI8/COL4	0.251	FALSE	2
Day2	col2_7	Ec21	pOXA-48	AZI8/AZI8	0.251	FALSE	2
Day2	col2_7	Ec21	pOXA-48	AZI8/COL4	0.251	FALSE	2
Day3	col2_1	Ec21	pOXA-48	COL4/AZI8	0.252	FALSE	3
Day2	col3_1	Ec18	Empty	AZI8/AZI8	0.253	FALSE	2
Day2	col3_1	Ec18	Empty	AZI8/COL4	0.253	FALSE	2
Day2	1_2	MG1655	Empty	AZI8/AZI8	0.254	FALSE	2
Day2	1_2	MG1655	Empty	AZI8/COL4	0.254	FALSE	2
Day2	col3_3	Ec21	Empty	AZI8/AZI8	0.254	FALSE	2
Day2	col3_3	Ec21	Empty	AZI8/COL4	0.254	FALSE	2
Day2	col1_1	Ec18	Empty	AZI8/AZI8	0.255	FALSE	2
Day2	col1_1	Ec18	Empty	AZI8/COL4	0.255	FALSE	2
Day2	col3_2	Ec21	Empty	AZI8/AZI8	0.255	FALSE	2
Day2	col1_4	Ec21	pOXA-48	AZI8/AZI8	0.255	FALSE	2
Day2	col3_2	Ec21	Empty	AZI8/COL4	0.255	FALSE	2
Day2	col1_4	Ec21	pOXA-48	AZI8/COL4	0.255	FALSE	2
Day2	5_1	MG1655	Empty	AZI8/AZI8	0.256	FALSE	2
Day2	5_1	MG1655	Empty	AZI8/COL4	0.256	FALSE	2
Day2	col1_6	Ec18	Empty	AZI8/AZI8	0.256	FALSE	2
Day2	col1_6	Ec18	Empty	AZI8/COL4	0.256	FALSE	2
Day2	6_6	MG1655	Empty	COL4/COL4	0.257	FALSE	2
Day2	6_6	MG1655	Empty	COL4/AZI8	0.257	FALSE	2
Day3	4_2	MG1655	Empty	AZI8/AZI8	0.257	FALSE	3
Day2	col1_2	Ec21	Empty	AZI8/AZI8	0.258	FALSE	2
Day2	col2_3	Ec21	pOXA-48	AZI8/AZI8	0.258	FALSE	2
Day2	col1_2	Ec21	Empty	AZI8/COL4	0.258	FALSE	2
Day2	col2_3	Ec21	pOXA-48	AZI8/COL4	0.258	FALSE	2
Day3	col1_3	Ec21	pOXA-48	COL4/AZI8	0.259	FALSE	3
Day3	col3_1	Ec21	Empty	COL4/AZI8	0.26	FALSE	3
Day2	col2_1	Ec18	Empty	AZI8/AZI8	0.261	FALSE	2
Day2	col2_1	Ec18	Empty	AZI8/COL4	0.261	FALSE	2
Day3	col2_1	Ec21	Empty	COL4/AZI8	0.261	FALSE	3
Day3	col2_3	Ec21	Empty	COL4/AZI8	0.262	FALSE	3
Day2	col1_4	Ec18	Empty	AZI8/AZI8	0.263	FALSE	2
Day2	col2_7	Ec18	Empty	AZI8/AZI8	0.263	FALSE	2
Day2	col1_4	Ec18	Empty	AZI8/COL4	0.263	FALSE	2
Day2	col2_7	Ec18	Empty	AZI8/COL4	0.263	FALSE	2
Day2	col1_8	Ec21	pOXA-48	COL4/AZI8	0.263	FALSE	2
Day2	col1_8	Ec21	pOXA-48	COL4/COL4	0.263	FALSE	2
Day3	col1_7	Ec18	pOXA-48	COL4/AZI8	0.263	FALSE	3
Day2	col2_8	Ec21	Empty	AZI8/AZI8	0.264	FALSE	2
Day2	col2_8	Ec21	Empty	AZI8/COL4	0.264	FALSE	2
Day2	col2_4	Ec18	Empty	AZI8/AZI8	0.265	FALSE	2
Day2	col2_4	Ec18	Empty	AZI8/COL4	0.265	FALSE	2
Day2	col1_2	Ec21	pOXA-48	AZI8/AZI8	0.265	FALSE	2
Day2	col1_2	Ec21	pOXA-48	AZI8/COL4	0.265	FALSE	2
Day2	col1_5	Ec21	Empty	AZI8/AZI8	0.266	FALSE	2
Day2	col1_5	Ec21	Empty	AZI8/COL4	0.266	FALSE	2
Day3	col3_3	Ec21	Empty	AZI8/AZI8	0.266	FALSE	3
Day3	col2_4	Ec21	Empty	COL4/AZI8	0.266	FALSE	3
Day3	1_3	MG1655	Empty	AZI8/AZI8	0.267	FALSE	3
Day2	col1_8	Ec21	Empty	AZI8/AZI8	0.267	FALSE	2
Day2	col3_6	Ec21	Empty	AZI8/AZI8	0.267	FALSE	2
Day2	col1_8	Ec21	Empty	AZI8/COL4	0.267	FALSE	2
Day2	col3_6	Ec21	Empty	AZI8/COL4	0.267	FALSE	2
Day2	col2_1	Ec18	pOXA-48	COL4/COL4	0.268	FALSE	2
Day2	col2_1	Ec18	pOXA-48	COL4/AZI8	0.268	FALSE	2
Day3	col2_8	Ec21	Empty	COL4/AZI8	0.268	FALSE	3
Day3	col1_8	Ec21	pOXA-48	AZI8/AZI8	0.269	FALSE	3
Day3	col2_7	Ec21	pOXA-48	COL4/AZI8	0.271	FALSE	3
Day3	col2_8	Ec18	pOXA-48	COL4/AZI8	0.272	FALSE	3
Day2	col3_2	Ec18	Empty	AZI8/AZI8	0.274	FALSE	2
Day2	col3_2	Ec18	Empty	AZI8/COL4	0.274	FALSE	2
Day3	col3_2	Ec21	Empty	AZI8/AZI8	0.274	FALSE	3
Day3	col2_5	Ec21	Empty	COL4/AZI8	0.274	FALSE	3
Day2	col2_4	Ec21	Empty	AZI8/AZI8	0.275	FALSE	2
Day2	col2_4	Ec21	Empty	AZI8/COL4	0.275	FALSE	2
Day3	col1_2	Ec21	Empty	AZI8/AZI8	0.275	FALSE	3
Day2	col2_3	Ec21	Empty	AZI8/AZI8	0.276	FALSE	2
Day2	col2_5	Ec21	Empty	AZI8/AZI8	0.276	FALSE	2
Day2	col3_4	Ec21	pOXA-48	AZI8/AZI8	0.276	FALSE	2
Day2	col2_3	Ec21	Empty	AZI8/COL4	0.276	FALSE	2
Day2	col2_5	Ec21	Empty	AZI8/COL4	0.276	FALSE	2
Day2	col3_4	Ec21	pOXA-48	AZI8/COL4	0.276	FALSE	2
Day3	col3_5	Ec21	Empty	AZI8/AZI8	0.277	FALSE	3
Day3	col2_7	Ec21	Empty	COL4/AZI8	0.278	FALSE	3
Day2	2_8	MG1655	Empty	COL4/COL4	0.279	FALSE	2
Day2	2_8	MG1655	Empty	COL4/AZI8	0.279	FALSE	2
Day3	col2_5	Ec21	Empty	AZI8/AZI8	0.279	FALSE	3
Day3	col3_8	Ec21	Empty	COL4/AZI8	0.279	FALSE	3
Day3	1_1	MG1655	Empty	AZI8/AZI8	0.28	FALSE	3
Day3	col1_7	Ec21	Empty	AZI8/AZI8	0.28	FALSE	3
Day3	col3_6	Ec21	pOXA-48	COL4/AZI8	0.28	FALSE	3
Day2	col2_2	Ec18	Empty	AZI8/AZI8	0.281	FALSE	2
Day2	col2_2	Ec18	Empty	AZI8/COL4	0.281	FALSE	2
Day3	col3_6	Ec21	Empty	AZI8/AZI8	0.282	FALSE	3
Day3	col2_6	Ec18	pOXA-48	COL4/AZI8	0.286	FALSE	3
Day3	4_1	MG1655	Empty	AZI8/AZI8	0.288	FALSE	3
Day2	col3_3	Ec21	pOXA-48	COL4/AZI8	0.288	FALSE	2
Day2	col3_3	Ec21	pOXA-48	COL4/COL4	0.288	FALSE	2
Day3	col2_7	Ec18	pOXA-48	COL4/AZI8	0.288	FALSE	3
Day2	col3_4	Ec21	Empty	AZI8/AZI8	0.291	FALSE	2
Day2	col3_4	Ec21	Empty	AZI8/COL4	0.291	FALSE	2
Day3	col2_2	Ec21	Empty	AZI8/AZI8	0.291	FALSE	3
Day3	col3_7	Ec21	Empty	AZI8/AZI8	0.292	FALSE	3
Day3	col1_6	Ec18	pOXA-48	COL4/AZI8	0.293	FALSE	3
Day3	col2_5	Ec18	pOXA-48	COL4/AZI8	0.293	FALSE	3
Day3	col1_4	Ec21	Empty	AZI8/AZI8	0.293	FALSE	3
Day3	col2_1	Ec21	Empty	AZI8/AZI8	0.294	FALSE	3
Day3	col3_1	Ec21	Empty	AZI8/AZI8	0.294	FALSE	3
Day2	col2_6	Ec21	Empty	AZI8/AZI8	0.295	FALSE	2
Day2	col2_6	Ec21	Empty	AZI8/COL4	0.295	FALSE	2
Day2	col3_7	Ec21	pOXA-48	COL4/AZI8	0.295	FALSE	2
Day2	col3_7	Ec21	pOXA-48	COL4/COL4	0.295	FALSE	2
Day3	col1_6	Ec21	Empty	AZI8/AZI8	0.295	FALSE	3
Day3	col3_4	Ec21	Empty	COL4/AZI8	0.295	FALSE	3
Day3	col1_6	Ec21	pOXA-48	COL4/AZI8	0.296	FALSE	3
Day3	col1_8	Ec18	pOXA-48	COL4/AZI8	0.297	FALSE	3
Day3	col3_3	Ec21	Empty	COL4/AZI8	0.298	FALSE	3
Day3	col1_2	Ec18	pOXA-48	COL4/AZI8	0.299	FALSE	3
Day3	col3_5	Ec21	Empty	COL4/AZI8	0.3	FALSE	3
Day3	col2_3	Ec21	Empty	AZI8/AZI8	0.301	FALSE	3
Day3	col3_7	Ec21	pOXA-48	COL4/AZI8	0.301	FALSE	3
Day2	col1_2	Ec18	Empty	AZI8/AZI8	0.303	FALSE	2
Day2	col1_2	Ec18	Empty	AZI8/COL4	0.303	FALSE	2
Day3	col2_6	Ec21	Empty	COL4/AZI8	0.305	FALSE	3
Day2	col3_7	Ec18	pOXA-48	COL4/COL4	0.306	FALSE	2
Day2	col3_7	Ec18	pOXA-48	COL4/AZI8	0.306	FALSE	2
Day3	col1_1	Ec18	pOXA-48	COL4/AZI8	0.306	FALSE	3
Day3	col1_8	Ec21	Empty	AZI8/AZI8	0.306	FALSE	3
Day3	col2_1	Ec18	pOXA-48	COL4/AZI8	0.307	FALSE	3
Day3	1_4	MG1655	Empty	AZI8/AZI8	0.308	FALSE	3
Day3	col3_7	Ec18	pOXA-48	COL4/AZI8	0.308	FALSE	3
Day3	5_1	MG1655	Empty	AZI8/AZI8	0.309	FALSE	3
Day3	col3_8	Ec21	Empty	AZI8/AZI8	0.309	FALSE	3
Day3	col2_4	Ec21	Empty	AZI8/AZI8	0.31	FALSE	3
Day3	col3_8	Ec18	pOXA-48	COL4/AZI8	0.311	FALSE	3
Day3	col2_6	Ec21	Empty	AZI8/AZI8	0.311	FALSE	3
Day2	col1_5	Ec21	pOXA-48	COL4/AZI8	0.312	FALSE	2
Day2	col1_5	Ec21	pOXA-48	COL4/COL4	0.312	FALSE	2
Day3	col2_6	Ec21	pOXA-48	COL4/AZI8	0.312	FALSE	3
Day2	6_1	MG1655	Empty	COL4/COL4	0.314	FALSE	2
Day2	6_1	MG1655	Empty	COL4/AZI8	0.314	FALSE	2
Day2	col2_6	Ec18	pOXA-48	COL4/COL4	0.315	FALSE	2
Day2	col2_6	Ec18	pOXA-48	COL4/AZI8	0.315	FALSE	2
Day2	col3_8	Ec21	Empty	COL4/AZI8	0.316	FALSE	2
Day2	col2_6	Ec21	pOXA-48	COL4/AZI8	0.316	FALSE	2
Day2	col3_8	Ec21	Empty	COL4/COL4	0.316	FALSE	2
Day2	col2_6	Ec21	pOXA-48	COL4/COL4	0.316	FALSE	2
Day2	col1_2	Ec21	pOXA-48	COL4/AZI8	0.32	FALSE	2
Day2	col1_2	Ec21	pOXA-48	COL4/COL4	0.32	FALSE	2
Day3	col2_8	Ec21	Empty	AZI8/AZI8	0.32	FALSE	3
Day2	col2_7	Ec21	pOXA-48	COL4/AZI8	0.321	FALSE	2
Day2	col2_7	Ec21	pOXA-48	COL4/COL4	0.321	FALSE	2
Day3	col3_6	Ec18	pOXA-48	COL4/AZI8	0.321	FALSE	3
Day2	col1_6	Ec18	pOXA-48	COL4/COL4	0.323	FALSE	2
Day2	col1_6	Ec18	pOXA-48	COL4/AZI8	0.323	FALSE	2
Day2	col2_7	Ec18	pOXA-48	COL4/COL4	0.324	FALSE	2
Day2	col2_7	Ec18	pOXA-48	COL4/AZI8	0.324	FALSE	2
Day3	col1_3	Ec21	Empty	AZI8/AZI8	0.324	FALSE	3
Day2	3_5	MG1655	pOXA-48	COL4/COL4	0.325	FALSE	2
Day2	3_5	MG1655	pOXA-48	COL4/AZI8	0.325	FALSE	2
Day2	col1_7	Ec18	pOXA-48	COL4/COL4	0.325	FALSE	2
Day2	col1_7	Ec18	pOXA-48	COL4/AZI8	0.325	FALSE	2
Day3	col3_6	Ec21	Empty	COL4/AZI8	0.325	FALSE	3
Day2	col2_8	Ec21	pOXA-48	COL4/AZI8	0.328	FALSE	2
Day2	col2_8	Ec21	pOXA-48	COL4/COL4	0.328	FALSE	2
Day3	col2_7	Ec21	Empty	AZI8/AZI8	0.328	FALSE	3
Day2	5_7	MG1655	Empty	COL4/COL4	0.33	FALSE	2
Day2	5_7	MG1655	Empty	COL4/AZI8	0.33	FALSE	2
Day3	col3_7	Ec21	Empty	COL4/AZI8	0.33	FALSE	3
Day2	col1_3	Ec21	pOXA-48	COL4/AZI8	0.331	FALSE	2
Day2	col1_3	Ec21	pOXA-48	COL4/COL4	0.331	FALSE	2
Day3	col1_5	Ec21	Empty	AZI8/AZI8	0.332	FALSE	3
Day2	col2_4	Ec25	pOXA-48	COL4/AZI8	0.336	FALSE	2
Day2	col2_4	Ec25	pOXA-48	COL4/COL4	0.336	FALSE	2
Day2	col3_6	Ec21	pOXA-48	COL4/AZI8	0.337	FALSE	2
Day2	col3_6	Ec21	pOXA-48	COL4/COL4	0.337	FALSE	2
Day3	col3_8	Ec18	pOXA-48	AZI8/AZI8	0.339	FALSE	3
Day3	col1_1	Ec18	Empty	COL4/AZI8	0.339	FALSE	3
Day3	col2_8	Ec18	pOXA-48	AZI8/AZI8	0.348	FALSE	3
Day3	col3_4	Ec21	Empty	AZI8/AZI8	0.349	FALSE	3
Day2	5_8	MG1655	Empty	COL4/COL4	0.35	FALSE	2
Day2	5_8	MG1655	Empty	COL4/AZI8	0.35	FALSE	2
Day3	col2_5	Ec18	pOXA-48	AZI8/AZI8	0.352	FALSE	3
Day3	col1_4	Ec18	pOXA-48	AZI8/AZI8	0.354	FALSE	3
Day2	col1_7	Ec25	pOXA-48	COL4/AZI8	0.355	FALSE	2
Day2	col1_7	Ec25	pOXA-48	COL4/COL4	0.355	FALSE	2
Day2	col1_6	Ec21	pOXA-48	COL4/AZI8	0.356	FALSE	2
Day2	col1_6	Ec21	pOXA-48	COL4/COL4	0.356	FALSE	2
Day3	col1_5	Ec18	Empty	AZI8/AZI8	0.359	FALSE	3
Day2	col3_5	Ec25	pOXA-48	AZI8/AZI8	0.36	FALSE	2
Day2	col3_5	Ec25	pOXA-48	AZI8/COL4	0.36	FALSE	2
Day3	col1_2	Ec25	pOXA-48	COL4/AZI8	0.36	FALSE	3
Day2	col2_5	Ec21	pOXA-48	COL4/AZI8	0.362	FALSE	2
Day2	col2_5	Ec21	pOXA-48	COL4/COL4	0.362	FALSE	2
Day2	col2_3	Ec21	pOXA-48	COL4/AZI8	0.363	FALSE	2
Day2	col2_3	Ec21	pOXA-48	COL4/COL4	0.363	FALSE	2
Day3	col3_1	Ec18	pOXA-48	AZI8/AZI8	0.363	FALSE	3
Day3	col2_2	Ec18	Empty	COL4/AZI8	0.363	FALSE	3
Day2	1_8	MG1655	Empty	COL4/COL4	0.364	FALSE	2
Day2	1_8	MG1655	Empty	COL4/AZI8	0.364	FALSE	2
Day3	1_8	MG1655	Empty	COL4/COL4	0.366	FALSE	3
Day3	col1_4	Ec18	Empty	AZI8/AZI8	0.366	FALSE	3
Day3	col3_5	Ec18	Empty	AZI8/AZI8	0.366	FALSE	3
Day3	col2_2	Ec18	pOXA-48	COL4/AZI8	0.369	FALSE	3
Day2	col1_8	Ec25	Empty	COL4/AZI8	0.371	FALSE	2
Day2	col2_2	Ec25	pOXA-48	COL4/AZI8	0.371	FALSE	2
Day2	col1_8	Ec25	Empty	COL4/COL4	0.371	FALSE	2
Day2	col2_2	Ec25	pOXA-48	COL4/COL4	0.371	FALSE	2
Day2	col1_8	Ec18	pOXA-48	COL4/COL4	0.372	FALSE	2
Day2	col1_8	Ec18	pOXA-48	COL4/AZI8	0.372	FALSE	2
Day3	col1_3	Ec18	Empty	COL4/AZI8	0.372	FALSE	3
Day3	col1_1	Ec25	pOXA-48	COL4/AZI8	0.372	FALSE	3
Day2	col1_8	Ec25	Empty	AZI8/AZI8	0.373	FALSE	2
Day2	col1_8	Ec25	Empty	AZI8/COL4	0.373	FALSE	2
Day2	col2_7	Ec21	Empty	COL4/AZI8	0.373	FALSE	2
Day2	col2_7	Ec21	Empty	COL4/COL4	0.373	FALSE	2
Day3	col3_4	Ec18	Empty	AZI8/AZI8	0.374	FALSE	3
Day2	col2_7	Ec18	Empty	COL4/COL4	0.375	FALSE	2
Day2	col2_7	Ec18	Empty	COL4/AZI8	0.375	FALSE	2
Day3	col3_4	Ec25	pOXA-48	COL4/AZI8	0.375	FALSE	3
Day2	col1_6	Ec25	pOXA-48	COL4/AZI8	0.376	FALSE	2
Day2	col1_6	Ec25	pOXA-48	COL4/COL4	0.376	FALSE	2
Day3	col2_2	Ec18	Empty	AZI8/AZI8	0.376	FALSE	3
Day2	col3_6	Ec18	Empty	COL4/COL4	0.377	FALSE	2
Day2	col3_6	Ec18	Empty	COL4/AZI8	0.377	FALSE	2
Day2	col3_8	Ec25	Empty	AZI8/AZI8	0.378	FALSE	2
Day2	col3_8	Ec25	Empty	AZI8/COL4	0.378	FALSE	2
Day3	col3_1	Ec18	Empty	COL4/AZI8	0.378	FALSE	3
Day3	col1_1	Ec25	Empty	COL4/AZI8	0.379	FALSE	3
Day2	col1_3	Ec18	Empty	COL4/COL4	0.38	FALSE	2
Day2	col1_3	Ec18	Empty	COL4/AZI8	0.38	FALSE	2
Day2	col3_4	Ec21	pOXA-48	COL4/AZI8	0.381	FALSE	2
Day2	col3_4	Ec21	pOXA-48	COL4/COL4	0.381	FALSE	2
Day3	col3_3	Ec18	Empty	COL4/AZI8	0.381	FALSE	3
Day3	col1_1	Ec18	Empty	AZI8/AZI8	0.382	FALSE	3
Day2	col3_5	Ec18	Empty	COL4/COL4	0.383	FALSE	2
Day2	col3_5	Ec18	Empty	COL4/AZI8	0.383	FALSE	2
Day3	col1_8	Ec18	Empty	AZI8/AZI8	0.383	FALSE	3
Day3	col3_7	Ec18	Empty	AZI8/AZI8	0.383	FALSE	3
Day3	col2_1	Ec18	Empty	COL4/AZI8	0.383	FALSE	3
Day2	col3_6	Ec18	pOXA-48	COL4/COL4	0.384	FALSE	2
Day2	col3_6	Ec18	pOXA-48	COL4/AZI8	0.384	FALSE	2
Day3	col3_6	Ec18	Empty	AZI8/AZI8	0.384	FALSE	3
Day2	col3_2	Ec25	pOXA-48	AZI8/AZI8	0.385	FALSE	2
Day2	col3_2	Ec25	pOXA-48	AZI8/COL4	0.385	FALSE	2
Day2	col3_5	Ec21	pOXA-48	COL4/AZI8	0.386	FALSE	2
Day2	col3_5	Ec21	pOXA-48	COL4/COL4	0.386	FALSE	2
Day3	col2_6	Ec18	Empty	COL4/AZI8	0.386	FALSE	3
Day2	col3_2	Ec25	Empty	COL4/AZI8	0.387	FALSE	2
Day2	col3_2	Ec25	Empty	COL4/COL4	0.387	FALSE	2
Day3	col3_5	Ec18	Empty	COL4/AZI8	0.387	FALSE	3
Day3	col3_2	Ec18	Empty	AZI8/AZI8	0.388	FALSE	3
Day3	col2_3	Ec18	Empty	COL4/AZI8	0.389	FALSE	3
Day2	col3_3	Ec25	pOXA-48	AZI8/AZI8	0.39	FALSE	2
Day2	col3_6	Ec25	pOXA-48	AZI8/AZI8	0.39	FALSE	2
Day2	col3_3	Ec25	pOXA-48	AZI8/COL4	0.39	FALSE	2
Day2	col3_6	Ec25	pOXA-48	AZI8/COL4	0.39	FALSE	2
Day2	col2_1	Ec25	Empty	COL4/AZI8	0.39	FALSE	2
Day2	col2_1	Ec25	Empty	COL4/COL4	0.39	FALSE	2
Day2	col2_2	Ec21	pOXA-48	COL4/AZI8	0.391	FALSE	2
Day2	col2_7	Ec25	pOXA-48	COL4/AZI8	0.391	FALSE	2
Day2	col2_2	Ec21	pOXA-48	COL4/COL4	0.391	FALSE	2
Day2	col2_7	Ec25	pOXA-48	COL4/COL4	0.391	FALSE	2
Day3	col3_8	Ec18	Empty	AZI8/AZI8	0.391	FALSE	3
Day3	col2_5	Ec25	Empty	COL4/AZI8	0.391	FALSE	3
Day2	4_8	MG1655	Empty	COL4/COL4	0.393	FALSE	2
Day2	4_8	MG1655	Empty	COL4/AZI8	0.393	FALSE	2
Day3	col2_6	Ec18	Empty	AZI8/AZI8	0.393	FALSE	3
Day3	col2_1	Ec25	Empty	COL4/AZI8	0.393	FALSE	3
Day3	col2_5	Ec18	Empty	AZI8/AZI8	0.394	FALSE	3
Day3	col1_7	Ec18	Empty	COL4/AZI8	0.394	FALSE	3
Day2	col2_1	Ec21	pOXA-48	COL4/AZI8	0.395	FALSE	2
Day2	col2_1	Ec21	pOXA-48	COL4/COL4	0.395	FALSE	2
Day3	col2_1	Ec25	pOXA-48	COL4/AZI8	0.395	FALSE	3
Day2	col3_8	Ec18	pOXA-48	COL4/COL4	0.396	FALSE	2
Day2	col3_8	Ec18	pOXA-48	COL4/AZI8	0.396	FALSE	2
Day3	col3_4	Ec18	Empty	COL4/AZI8	0.396	FALSE	3
Day2	col2_8	Ec25	Empty	AZI8/AZI8	0.397	FALSE	2
Day2	col2_8	Ec25	Empty	AZI8/COL4	0.397	FALSE	2
Day2	col2_3	Ec25	Empty	COL4/AZI8	0.398	FALSE	2
Day2	col2_3	Ec25	pOXA-48	COL4/AZI8	0.398	FALSE	2
Day2	col2_3	Ec25	Empty	COL4/COL4	0.398	FALSE	2
Day2	col2_3	Ec25	pOXA-48	COL4/COL4	0.398	FALSE	2
Day3	col2_8	Ec18	Empty	AZI8/AZI8	0.399	FALSE	3
Day3	col3_2	Ec25	Empty	COL4/AZI8	0.399	FALSE	3
Day2	col1_8	Ec25	pOXA-48	AZI8/AZI8	0.401	FALSE	2
Day2	col1_8	Ec25	pOXA-48	AZI8/COL4	0.401	FALSE	2
Day3	col1_5	Ec18	Empty	COL4/AZI8	0.401	FALSE	3
Day3	col3_6	Ec18	Empty	COL4/AZI8	0.401	FALSE	3
Day3	col3_5	Ec25	pOXA-48	COL4/AZI8	0.401	FALSE	3
Day2	col1_6	Ec18	Empty	COL4/COL4	0.402	FALSE	2
Day2	col1_6	Ec18	Empty	COL4/AZI8	0.402	FALSE	2
Day2	col3_8	Ec21	pOXA-48	COL4/AZI8	0.402	FALSE	2
Day2	col3_8	Ec21	pOXA-48	COL4/COL4	0.402	FALSE	2
Day3	col2_3	Ec18	Empty	AZI8/AZI8	0.402	FALSE	3
Day3	col2_3	Ec25	Empty	COL4/AZI8	0.402	FALSE	3
Day2	col3_7	Ec25	pOXA-48	AZI8/AZI8	0.403	FALSE	2
Day2	col3_7	Ec25	pOXA-48	AZI8/COL4	0.403	FALSE	2
Day3	col2_4	Ec18	Empty	AZI8/AZI8	0.403	FALSE	3
Day2	col3_2	Ec25	pOXA-48	COL4/AZI8	0.405	FALSE	2
Day2	col3_2	Ec25	pOXA-48	COL4/COL4	0.405	FALSE	2
Day3	col3_2	Ec18	Empty	COL4/AZI8	0.406	FALSE	3
Day3	col3_3	Ec25	pOXA-48	COL4/AZI8	0.407	FALSE	3
Day3	col3_3	Ec18	Empty	AZI8/AZI8	0.408	FALSE	3
Day3	col1_2	Ec18	Empty	AZI8/AZI8	0.409	FALSE	3
Day3	col3_7	Ec25	pOXA-48	COL4/AZI8	0.409	FALSE	3
Day3	col2_1	Ec18	Empty	AZI8/AZI8	0.41	FALSE	3
Day3	col2_5	Ec18	Empty	COL4/AZI8	0.41	FALSE	3
Day3	col3_2	Ec25	pOXA-48	COL4/AZI8	0.41	FALSE	3
Day2	col3_7	Ec18	Empty	COL4/COL4	0.411	FALSE	2
Day2	col3_7	Ec18	Empty	COL4/AZI8	0.411	FALSE	2
Day2	col1_5	Ec25	pOXA-48	COL4/AZI8	0.411	FALSE	2
Day2	col1_5	Ec25	pOXA-48	COL4/COL4	0.411	FALSE	2
Day2	col2_5	Ec18	Empty	COL4/COL4	0.412	FALSE	2
Day2	col2_5	Ec18	Empty	COL4/AZI8	0.412	FALSE	2
Day2	col1_5	Ec18	Empty	COL4/COL4	0.413	FALSE	2
Day2	col1_5	Ec18	Empty	COL4/AZI8	0.413	FALSE	2
Day2	col3_2	Ec21	pOXA-48	COL4/AZI8	0.413	FALSE	2
Day2	col3_2	Ec21	pOXA-48	COL4/COL4	0.413	FALSE	2
Day3	col2_6	Ec18	Empty	COL4/COL4	0.413	FALSE	3
Day3	col1_2	Ec18	Empty	COL4/AZI8	0.413	FALSE	3
Day3	col3_1	Ec25	Empty	COL4/AZI8	0.415	FALSE	3
Day2	col1_2	Ec25	Empty	COL4/AZI8	0.417	FALSE	2
Day2	col1_2	Ec25	Empty	COL4/COL4	0.417	FALSE	2
Day3	col1_2	Ec25	Empty	COL4/AZI8	0.417	FALSE	3
Day2	col3_4	Ec25	pOXA-48	COL4/AZI8	0.419	FALSE	2
Day2	col3_4	Ec25	pOXA-48	COL4/COL4	0.419	FALSE	2
Day3	col3_6	Ec25	pOXA-48	COL4/AZI8	0.419	FALSE	3
Day3	col1_3	Ec18	Empty	AZI8/AZI8	0.421	FALSE	3
Day3	col2_3	Ec25	pOXA-48	COL4/AZI8	0.421	FALSE	3
Day3	col2_5	Ec25	pOXA-48	COL4/AZI8	0.421	FALSE	3
Day2	col2_8	Ec25	Empty	COL4/AZI8	0.422	FALSE	2
Day2	col2_8	Ec25	Empty	COL4/COL4	0.422	FALSE	2
Day3	col2_7	Ec18	Empty	AZI8/AZI8	0.422	FALSE	3
Day2	col1_4	Ec25	Empty	COL4/AZI8	0.423	FALSE	2
Day2	col1_4	Ec25	Empty	COL4/COL4	0.423	FALSE	2
Day3	col1_8	Ec25	pOXA-48	COL4/AZI8	0.423	FALSE	3
Day2	col2_6	Ec18	Empty	COL4/COL4	0.424	FALSE	2
Day2	col2_6	Ec18	Empty	COL4/AZI8	0.424	FALSE	2
Day2	col2_7	Ec25	Empty	COL4/AZI8	0.424	FALSE	2
Day2	col3_3	Ec25	pOXA-48	COL4/AZI8	0.424	FALSE	2
Day2	col2_7	Ec25	Empty	COL4/COL4	0.424	FALSE	2
Day2	col3_3	Ec25	pOXA-48	COL4/COL4	0.424	FALSE	2
Day3	col2_2	Ec25	Empty	COL4/AZI8	0.425	FALSE	3
Day3	col2_2	Ec25	pOXA-48	COL4/AZI8	0.425	FALSE	3
Day3	col3_1	Ec18	Empty	AZI8/AZI8	0.427	FALSE	3
Day3	col1_1	Ec25	pOXA-48	AZI8/AZI8	0.427	FALSE	3
Day3	col2_4	Ec25	pOXA-48	COL4/AZI8	0.428	FALSE	3
Day2	col3_3	Ec10	Empty	COL4/COL4	0.43	FALSE	2
Day2	col3_3	Ec10	Empty	COL4/AZI8	0.43	FALSE	2
Day2	col1_7	Ec18	Empty	COL4/COL4	0.433	FALSE	2
Day2	col1_7	Ec18	Empty	COL4/AZI8	0.433	FALSE	2
Day2	col1_5	Ec25	Empty	COL4/AZI8	0.433	FALSE	2
Day2	col2_5	Ec25	pOXA-48	COL4/AZI8	0.433	FALSE	2
Day2	col1_5	Ec25	Empty	COL4/COL4	0.433	FALSE	2
Day2	col2_5	Ec25	pOXA-48	COL4/COL4	0.433	FALSE	2
Day3	col1_8	Ec18	Empty	COL4/AZI8	0.433	FALSE	3
Day2	col1_1	Ec25	Empty	AZI8/AZI8	0.434	FALSE	2
Day2	col1_1	Ec25	Empty	AZI8/COL4	0.434	FALSE	2
Day2	col1_2	Ec25	pOXA-48	COL4/AZI8	0.436	FALSE	2
Day2	col1_2	Ec25	pOXA-48	COL4/COL4	0.436	FALSE	2
Day3	col3_7	Ec18	Empty	COL4/AZI8	0.437	FALSE	3
Day3	col3_7	Ec25	Empty	COL4/AZI8	0.437	FALSE	3
Day2	col3_7	Ec21	Empty	COL4/AZI8	0.438	FALSE	2
Day2	col3_7	Ec21	Empty	COL4/COL4	0.438	FALSE	2
Day3	col1_6	Ec18	Empty	COL4/AZI8	0.438	FALSE	3
Day2	col1_3	Ec25	Empty	COL4/AZI8	0.439	FALSE	2
Day2	col1_3	Ec25	Empty	COL4/COL4	0.439	FALSE	2
Day2	col2_2	Ec25	Empty	COL4/AZI8	0.44	FALSE	2
Day2	col2_2	Ec25	Empty	COL4/COL4	0.44	FALSE	2
Day3	col2_7	Ec25	Empty	COL4/AZI8	0.44	FALSE	3
Day3	col1_3	Ec25	pOXA-48	COL4/AZI8	0.44	FALSE	3
Day2	col1_7	Ec25	pOXA-48	AZI8/AZI8	0.441	FALSE	2
Day2	col1_7	Ec25	pOXA-48	AZI8/COL4	0.441	FALSE	2
Day2	col1_7	Ec25	Empty	COL4/AZI8	0.441	FALSE	2
Day2	col2_4	Ec25	Empty	COL4/AZI8	0.441	FALSE	2
Day2	col1_7	Ec25	Empty	COL4/COL4	0.441	FALSE	2
Day2	col2_4	Ec25	Empty	COL4/COL4	0.441	FALSE	2
Day3	col2_7	Ec25	pOXA-48	COL4/AZI8	0.441	FALSE	3
Day2	col1_7	Ec21	Empty	COL4/AZI8	0.442	FALSE	2
Day2	col1_7	Ec21	Empty	COL4/COL4	0.442	FALSE	2
Day2	col3_4	Ec25	pOXA-48	AZI8/AZI8	0.443	FALSE	2
Day2	col3_4	Ec25	pOXA-48	AZI8/COL4	0.443	FALSE	2
Day2	col3_3	Ec18	Empty	COL4/COL4	0.444	FALSE	2
Day2	col3_3	Ec18	Empty	COL4/AZI8	0.444	FALSE	2
Day2	col2_5	Ec25	Empty	COL4/AZI8	0.444	FALSE	2
Day2	col2_5	Ec25	Empty	COL4/COL4	0.444	FALSE	2
Day3	col2_8	Ec21	pOXA-48	AZI8/AZI8	0.444	FALSE	3
Day2	col2_3	Ec18	Empty	COL4/COL4	0.445	FALSE	2
Day2	col2_3	Ec18	Empty	COL4/AZI8	0.445	FALSE	2
Day2	col3_1	Ec21	pOXA-48	COL4/AZI8	0.445	FALSE	2
Day2	col3_1	Ec21	pOXA-48	COL4/COL4	0.445	FALSE	2
Day3	col3_8	Ec18	Empty	COL4/AZI8	0.445	FALSE	3
Day3	col3_1	Ec25	Empty	AZI8/AZI8	0.446	FALSE	3
Day2	6_8	MG1655	Empty	COL4/COL4	0.447	FALSE	2
Day2	6_8	MG1655	Empty	COL4/AZI8	0.447	FALSE	2
Day2	col2_5	Ec10	Empty	COL4/COL4	0.447	FALSE	2
Day2	col2_5	Ec10	Empty	COL4/AZI8	0.447	FALSE	2
Day2	col3_2	Ec21	Empty	COL4/AZI8	0.447	FALSE	2
Day2	col1_4	Ec25	pOXA-48	COL4/AZI8	0.447	FALSE	2
Day2	col2_8	Ec25	pOXA-48	COL4/AZI8	0.447	FALSE	2
Day2	col3_6	Ec25	pOXA-48	COL4/AZI8	0.447	FALSE	2
Day2	col3_2	Ec21	Empty	COL4/COL4	0.447	FALSE	2
Day2	col1_4	Ec25	pOXA-48	COL4/COL4	0.447	FALSE	2
Day2	col2_8	Ec25	pOXA-48	COL4/COL4	0.447	FALSE	2
Day2	col3_6	Ec25	pOXA-48	COL4/COL4	0.447	FALSE	2
[truncated: 1,457 more rows]
